# Supplementary material for: Glial dysregulation in the human brain in fragile X-associated tremor/ataxia syndrome
Source: PubMed Central journal article supplement (PMC10265985; doi:10.1073/pnas.2300052120), 2023-05-30
Supplement: pnas.2300052120.sapp.pdf [file pnas.2300052120.sapp.pdf]

## Supporting Information for

Glial dysregulation in human brain in Fragile X-associated tremor/ataxia  
syndrome

Caroline M. Dias, Biju Issac, Liang Sun, Abigail Lukowicz, Maya Talukdar,  
Shyam K. Akula, Michael B. Miller, Katherine Walsh, Shira Rockowitz,  
Christopher A. Walsh

### **This PDF file includes:**

Figures S1 to S12  
Tables S1 to S10  
Supplemental Information Files 1-3  
Supplemental Methods  
Supplemental References

### **Other supporting materials for this manuscript include the following excel files:**

Datasets S1-S20

A

Step 1: Fluorescent nuclear sorting

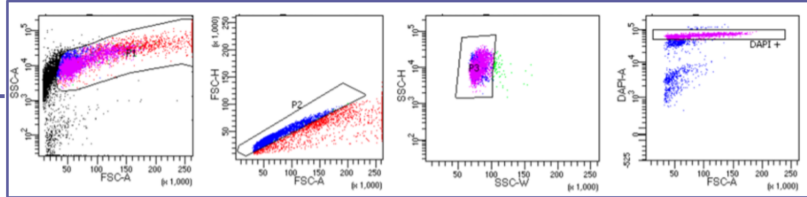

Representative image demonstrating gating strategy in fluorescent nuclear sorting. Filtering out dying nuclei, debris, and doublets followed by selection of DAPI + subset selects for ~5-15% parent population depending on tissue.

Step 2: Bioinformatic filtering

**Library & Sequencing QC**  
High coverage  
50K-100K reads/nuclei

**Seurat**  
High quality nuclei  
UMI>500  
genes>250  
 $\log_{10}(\text{genes}/\text{UMI}) > 0.8$   
mitochondrial ratio < 0.1

B

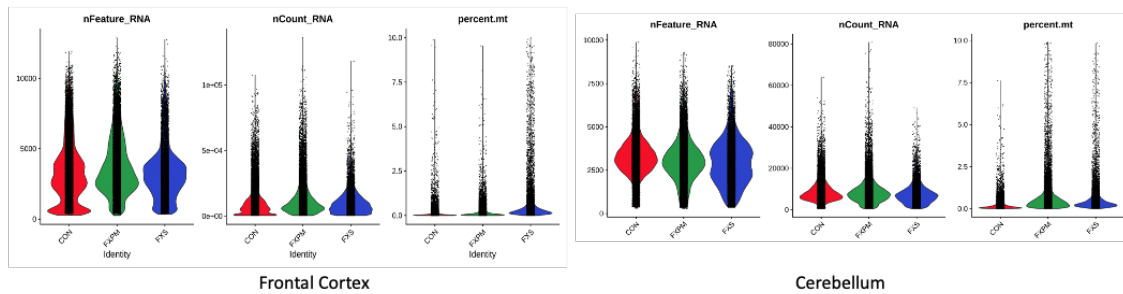

C

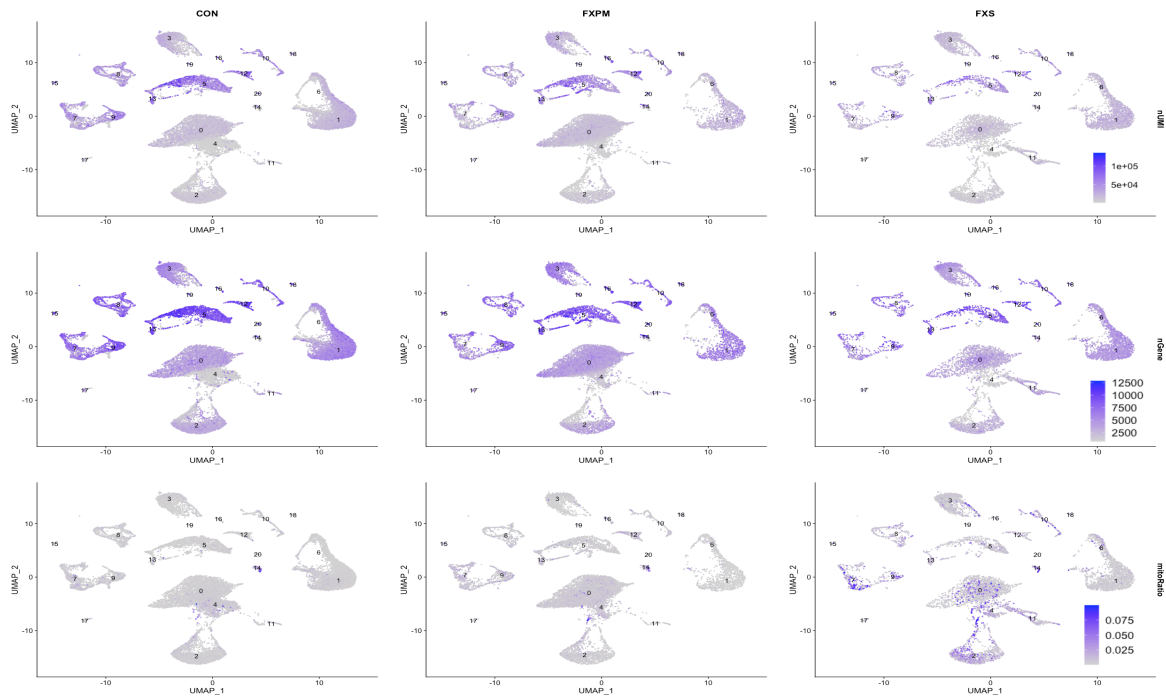

**Figure S1: Experimental and bioinformatic filtering pipeline and quality control metrics. A.** Representative gating strategy to obtain initial nuclei for encapsulation and subsequent bioinformatic processing. **B.** Overall group comparisons of number of genes/nuclei (features), counts/nuclei (UMI) and % mitochondrial gene expression in CON, FXPM, and FXS cases from left to right by region. **C.** UMAP depicting cell-type specific and condition specific differences in metrics in frontal cortex. Top row is number UMI, middle is number of genes, and bottom is mitochondrial gene percentage. (CON, FXPM, FXS from left to right). Clusters are described in Figure 1D.

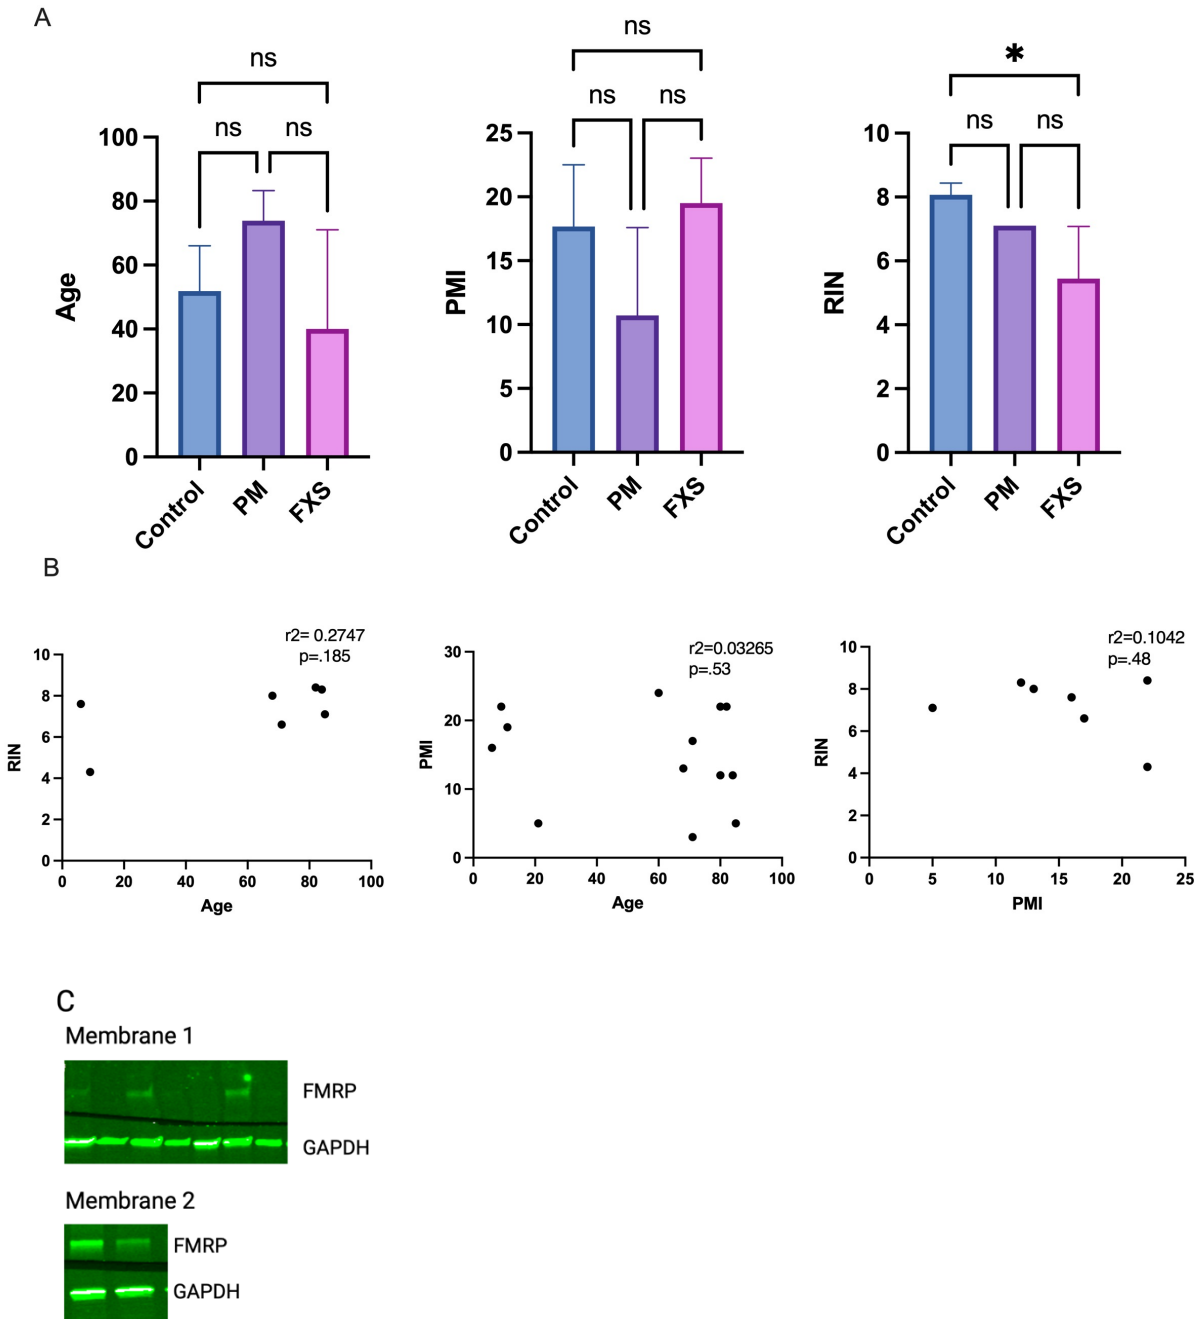

**Figure S2: Demographic and sample information. A.** No significant differences between groups with respect to age and PMI. FXS samples had lower RIN than control but not premutation cases ( $p < .05$ , one-way ANOVA, post-hoc Tukey's test). **B.** No significant correlation between RIN & Age, PMI & Age, or RIN & PMI among samples. **C.** Western blotting of frontal cortex premutation and FXS samples demonstrating variably reduced FMRP in premutation cases and absent FMRP in FXS cases. From left to right: 4664 (PM), 4806 (FXS), 5408 (CON), 5006 (PM), 5319 (FXS), 5657 (CON), 4555 (PM), 5497 (CON), 1793 (CON). Blots cropped for clarity.

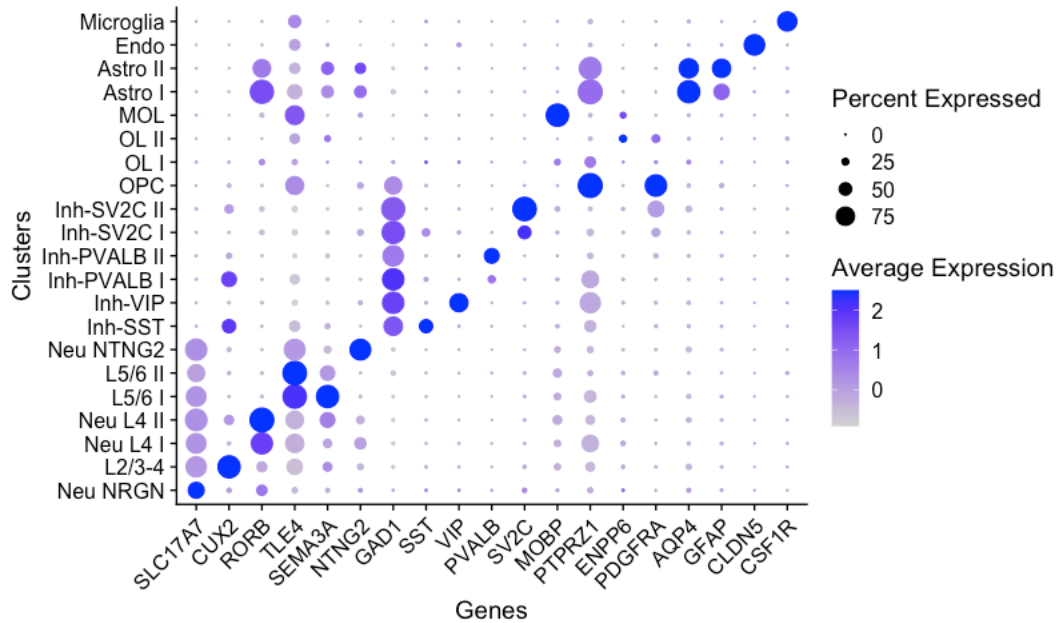

**Figure S3: High resolution frontal cortex cell-type specific markers are concordant with broader classification.** Note layer specific (CUX2, RORB, TLE4, SEMA3A, NTNG2) and inhibitory neuron subcluster specific (SST, VIP, PVALB, SV2C) expression.

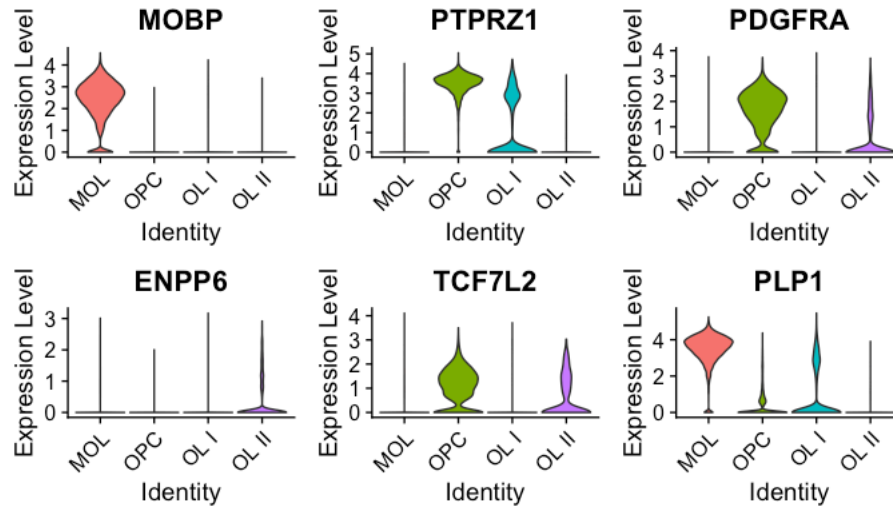

**Figure S4: Frontal cortex oligodendrocyte lineage markers.** Violin plots demonstrating distinct gene expression patterns in oligodendrocyte lineage clusters revealing a spectrum of developmental states.

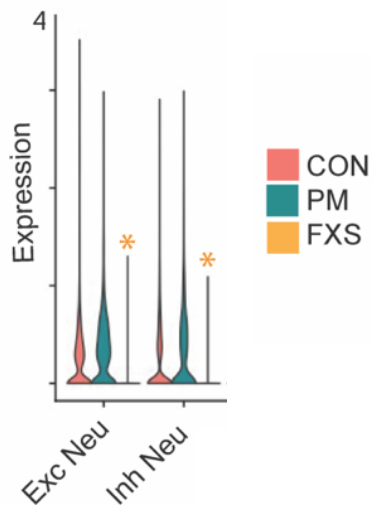

**Figure S5: Pseudobulk analysis of frontal cortex neuronal subpopulations.** This analysis reveals no significant changes in FMR1 mRNA in neurons in PM cases. Note significant downregulation in FXS cases despite the smaller n. Orange \*: reduced FMR1 in FXS vs CON  $p_{adj} < .05$ .

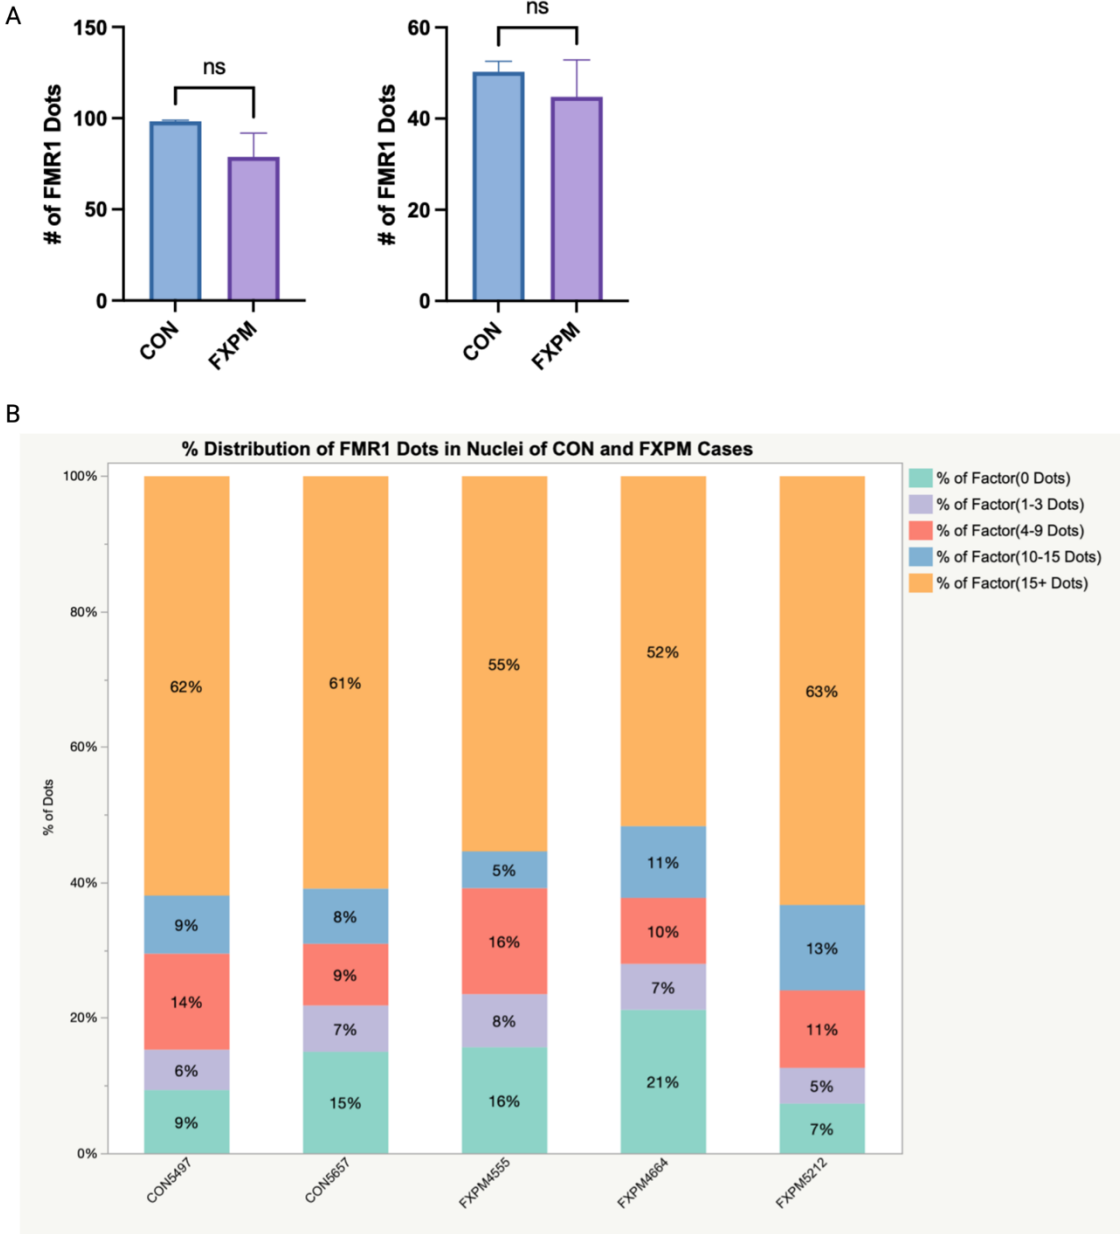

**Figure S6: FMR1 mRNA expression. A.** RNAscope demonstrates no change in FMR1 expression in all cells (left) or nuclei (right). (two-tailed t-test,  $p > .05$ ) **B.** Distribution of FMR1 expression in all nuclei, binned by # of dots/nuclei, and separated by sample.

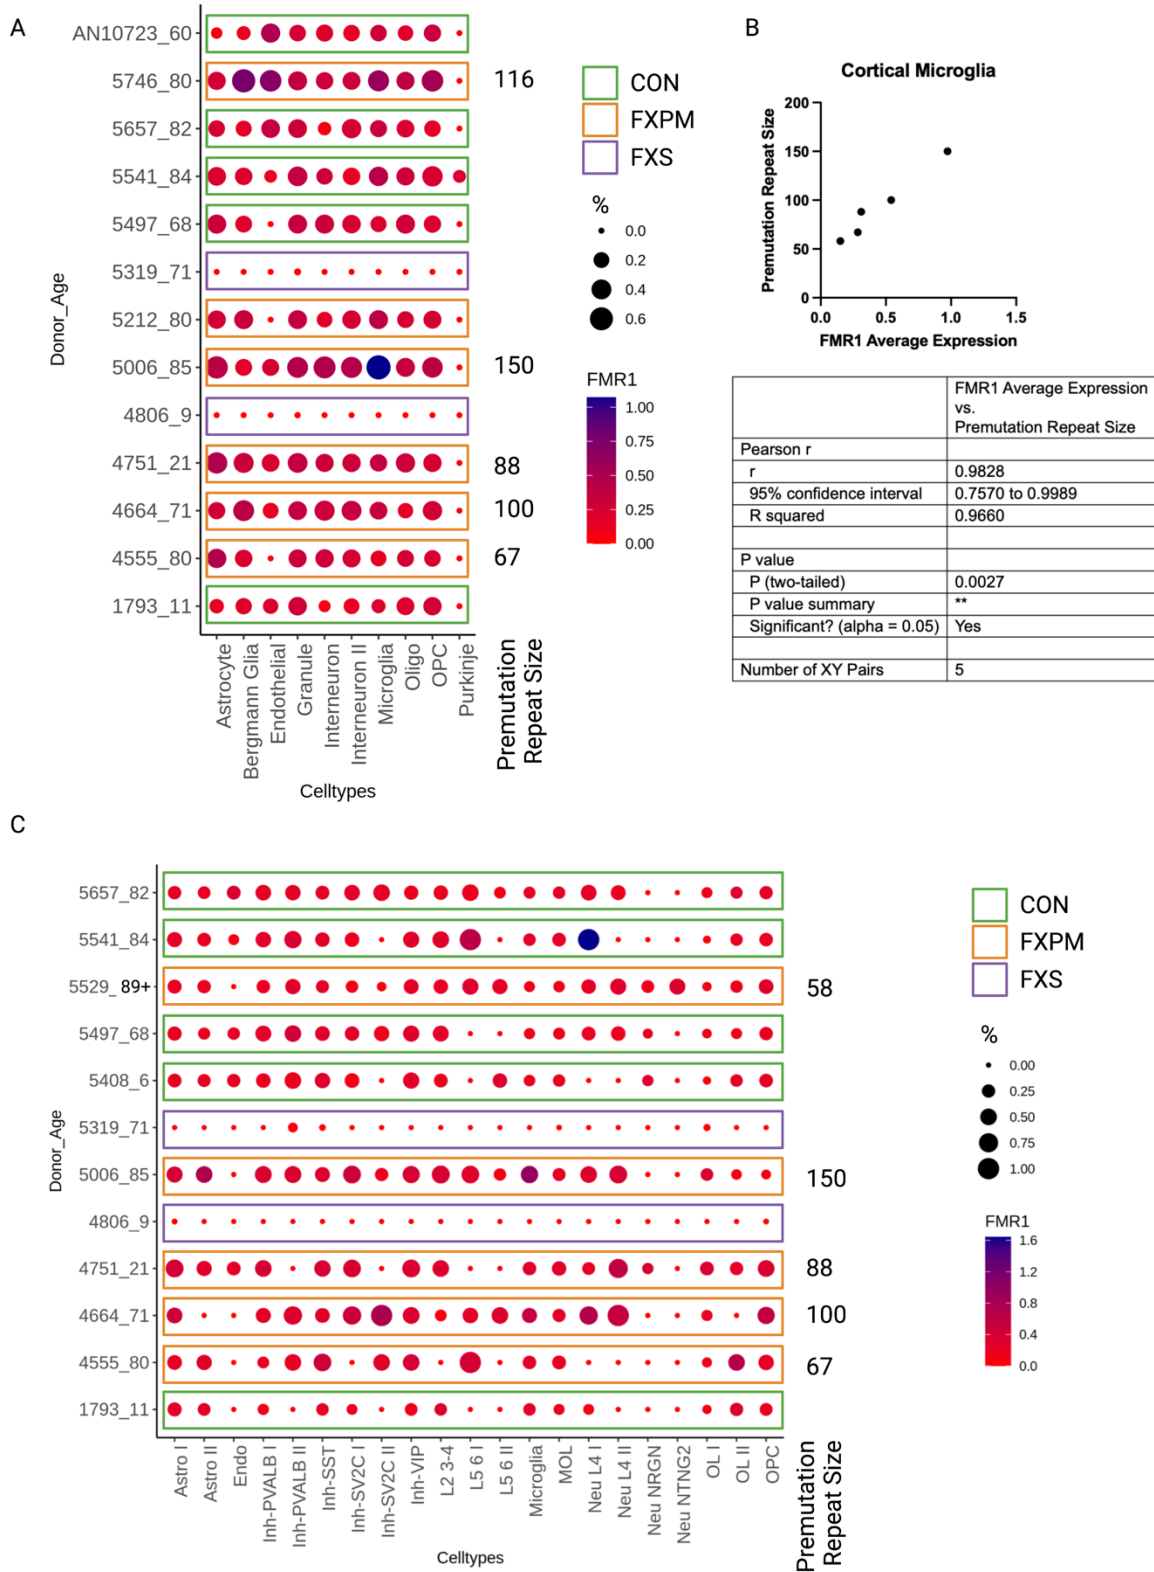

**Figure S7: Heterogeneity in FMR1 expression by donor. A.** snRNA-seq FMR1 expression in cerebellum separated by individual. **B.** There is a significant association between FMR1 expression in cortical microglia and premutation repeat size. **C.** Frontal cortex snRNA-seq FMR1 expression separated by individual. FMR1 heatmap shows average expression.

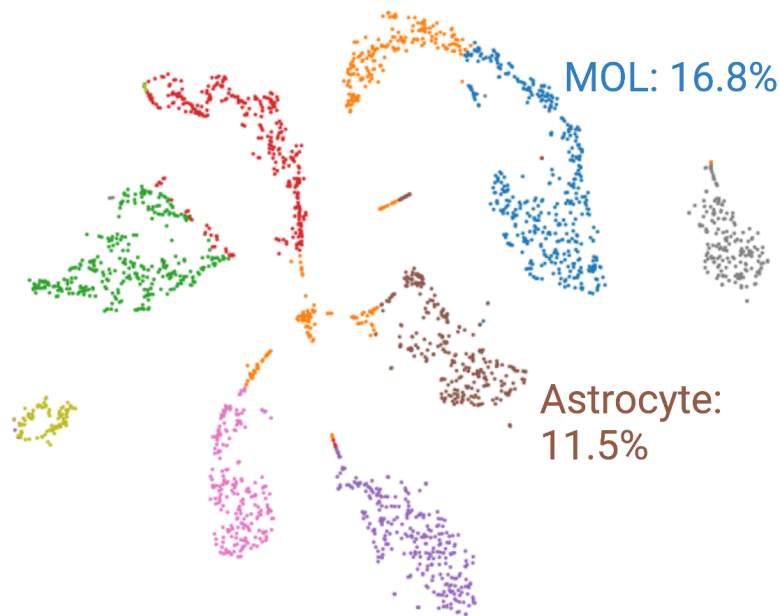

**Figure S8: Lack of glial cluster alterations in premutation BA22.** BA22 of 5746 demonstrates glial percentage comparable to control BA10, rather than premutation BA10 (see Table 2). Default clustering and tSNE plot output from Cell Ranger displayed, cell clusters for mature oligodendrocyte and astrocytes identified with PLP1 and AQP4 markers.



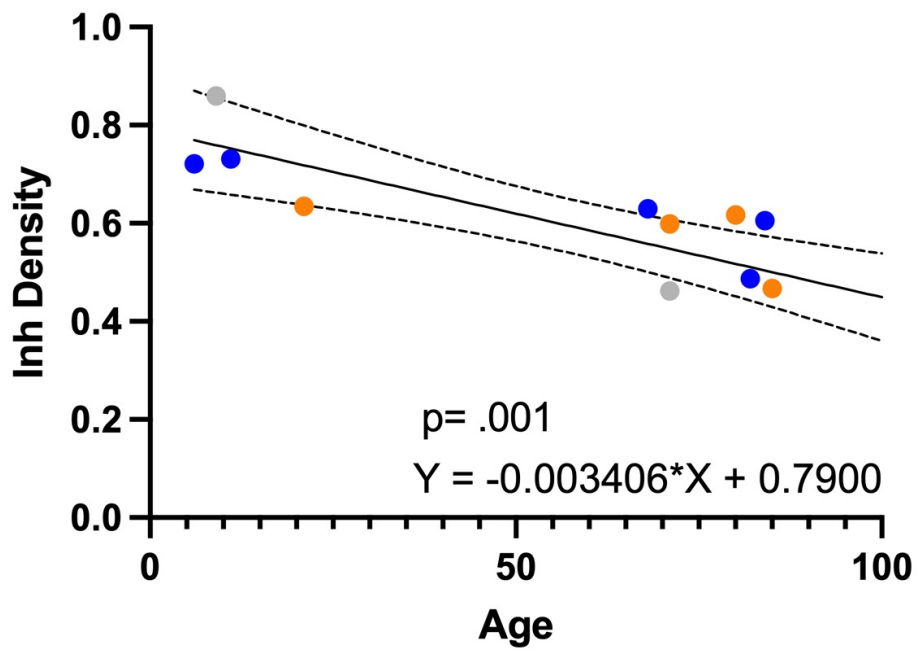

**Figure S9: Association between cortical inhibitory neuronal density (inhibitory/total neuron percentage) and age regardless of Fragile X status. Blue: control, grey: FXS, orange: FXPM.**

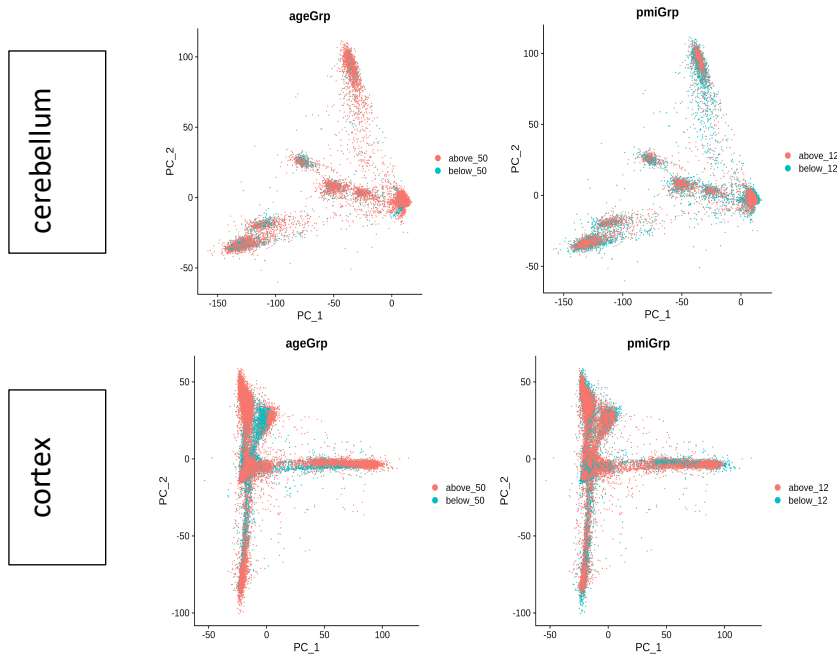

| % Unique DEG in Age | PM vs CON | FXS vs CON | PM vs FXS |
|---------------------|-----------|------------|-----------|
| Granule             | 0         | 0          | 0         |
| Bergmann Glia       | 0         | 0.2%       | 0.1%      |
| Interneuron II      | 0         | 4.3%       | 4.1%      |

| % Unique DEG in PMI | PM vs CON | FXS vs CON | PM vs FXS |
|---------------------|-----------|------------|-----------|
| Granule             | 0         | 0          | 0         |
| Bergmann Glia       | 0.4%      | 0.8%       | 0.3%      |
| Interneuron II      | 0         | 1.7%       | 5.9%      |

| % Overlap in No Variable and Age Lists | PM vs CON | FXS vs CON | PM vs FXS |
|----------------------------------------|-----------|------------|-----------|
| Granule                                | 100%      | 100%       | 98.9%     |
| Bergmann Glia                          | 98.7%     | 61.9%      | 90.2%     |
| Interneuron II                         | 99.7      | 32.1       | 81.1%     |

| % Overlap in No Variable and PMI Lists | PM vs CON | FXS vs CON | PM vs FXS |
|----------------------------------------|-----------|------------|-----------|
| Granule                                | 96.9%     | 91.4%      | 98.9%     |
| Bergmann Glia                          | 62.1%     | 93.1%      | 63.5%     |
| Interneuron II                         | 80.1      | 72.1       | 55%       |

**Figure S10: Analysis of effects of age and PMI on gene expression.** PCA plots demonstrating variability grouped by age (above and below 50 years old) and PMI (above and below 12 hours post-mortem). MAST was used to generate cell-type-specific differential expression lists with age and PMI independently and compared to gene lists without these variables. Inclusion of these variables did not add significant additional information (i.e. new unique DEG). The overlap of the no variable analysis and including age analysis, and no variable and PMI analysis, were largely concordant, except for some FXS comparisons. There was no change in significance of FMR1 (or lack thereof) within any of these gene lists although the precise padj varied.

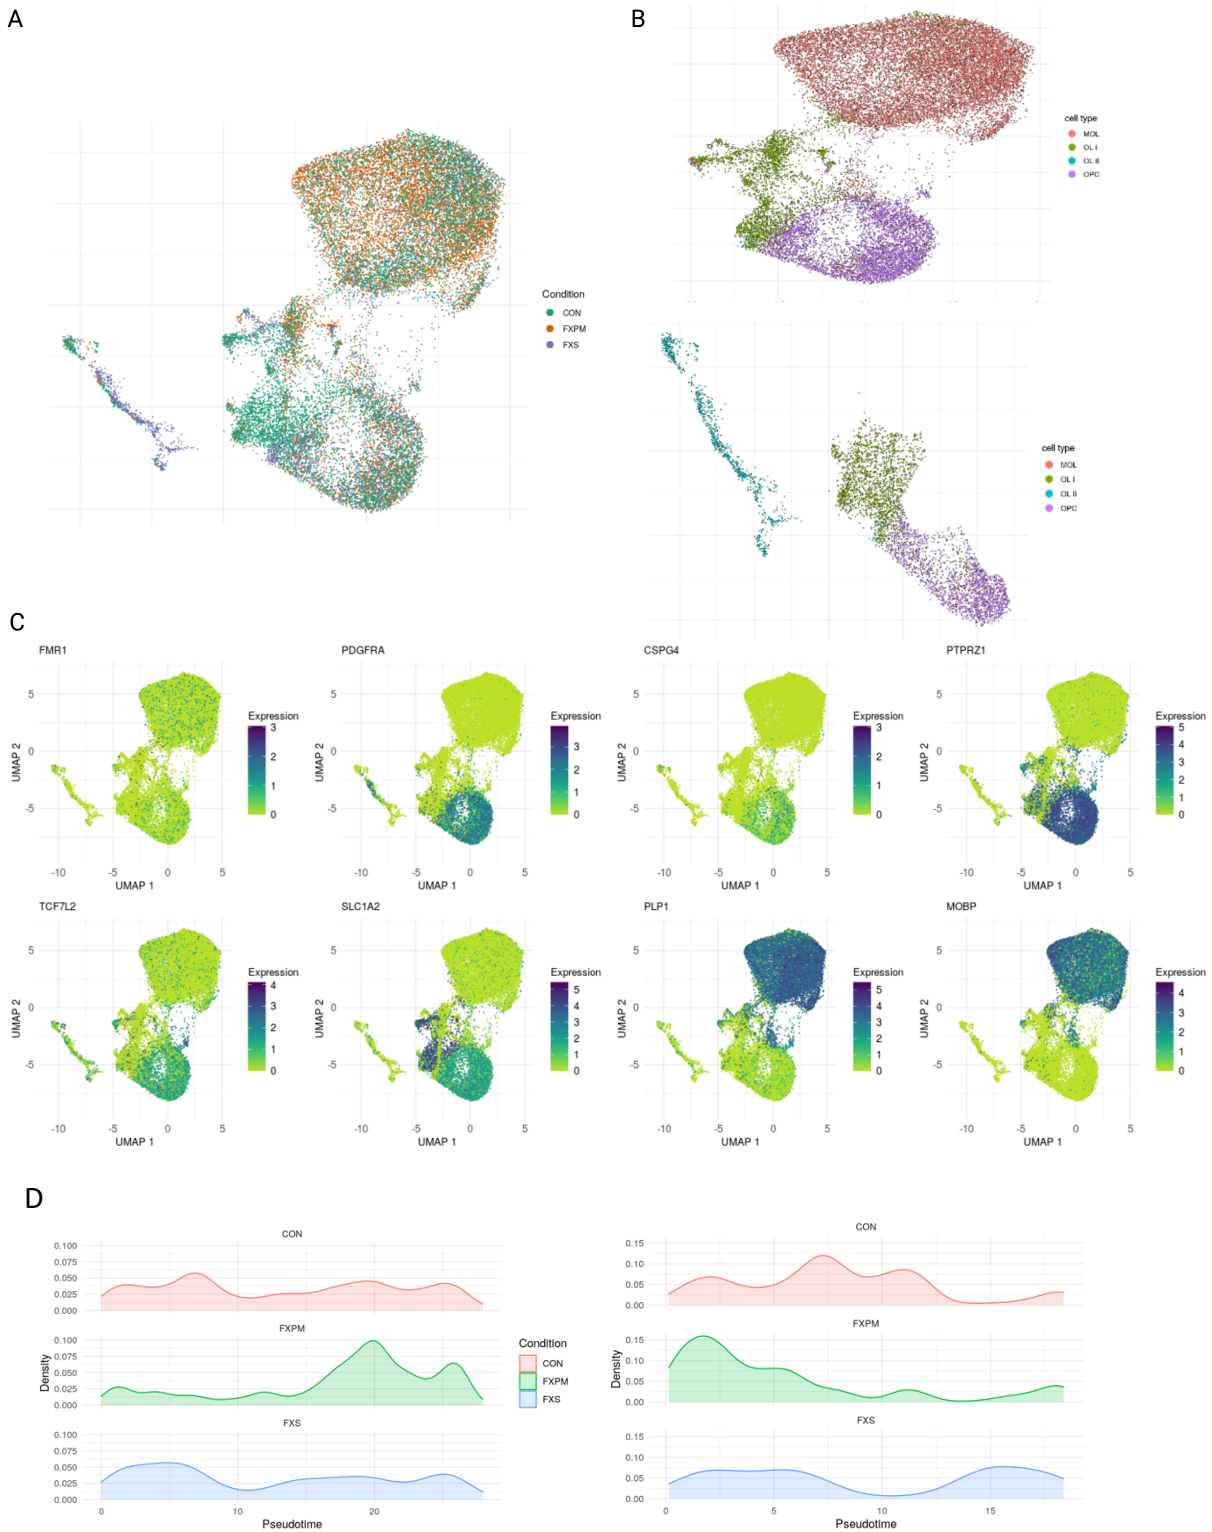

**Figure S11. Pseudotime recluster.** **A.** Reclustering demonstrates breakdown of conditions. **B.** Demonstration of two oligodendrocyte branches identified by reclustering. **C.** Markers of oligodendrocyte maturity and FMR1. **D.** Density plot of cell type distribution in branch 1 (left) and branch 2 (right).

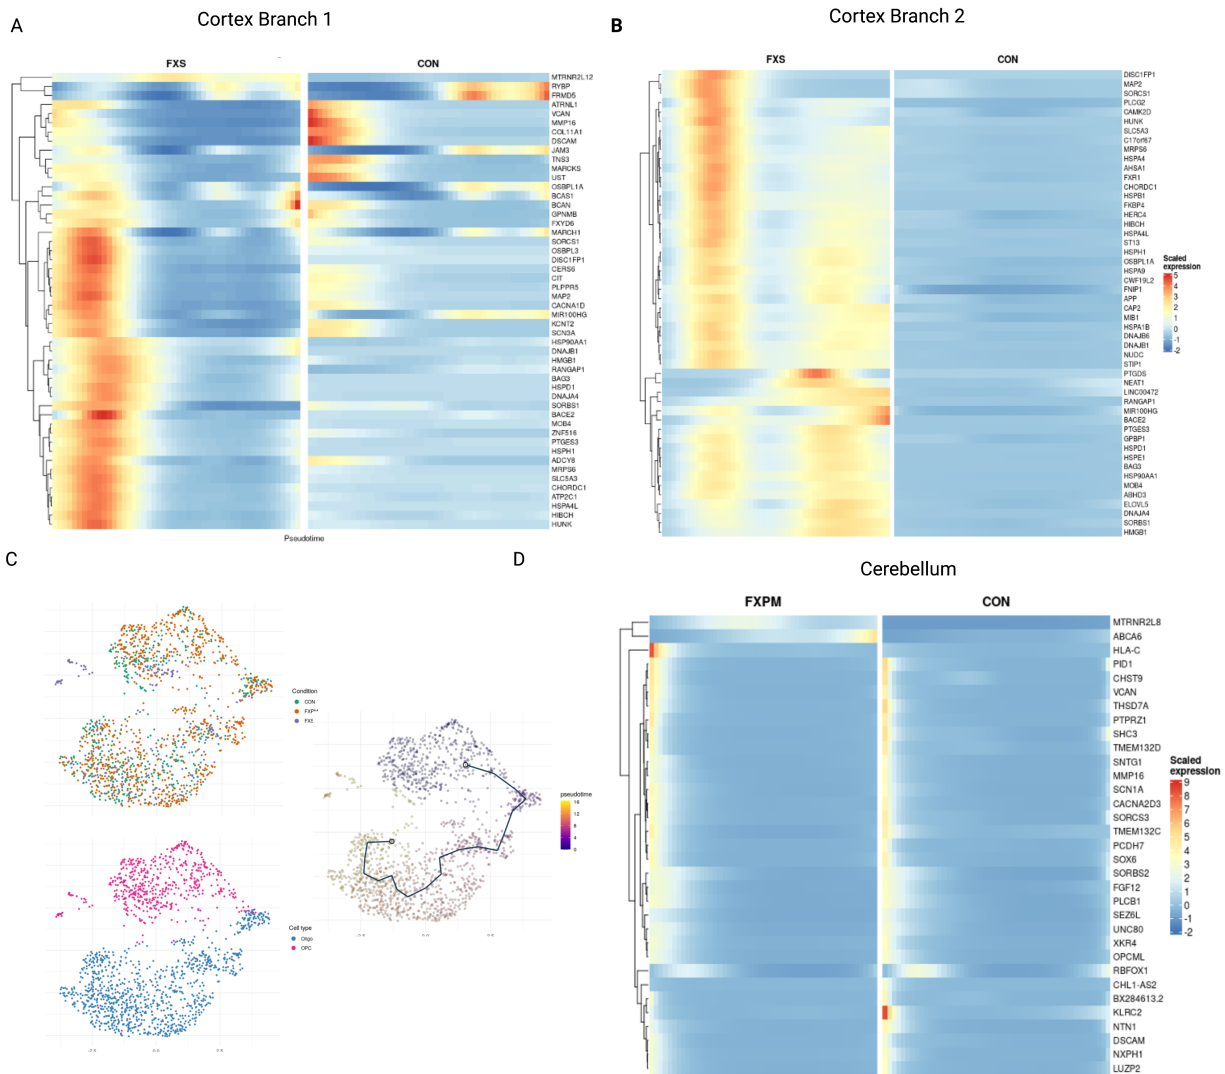

**Figure S12 Differential expression in pseudotime. A.** FXS vs. control comparisons in cortex pseudotime trajectory for branch 1. Heatmap shows top differentially expressed genes (pairwise comparison, Wald statistic). **B.** FXS vs. control comparisons in cortex pseudotime trajectory for branch 2. **C.** Cerebellar pseudotime reclustering broken down by condition (top right) and cell type (bottom right). **D.** Premutation vs. control comparisons in cerebellar pseudotime trajectory. Heatmap shows top differentially expressed genes.

| Cell_Type    | DEG_Count | Upreg_Count | Downreg_Count |
|--------------|-----------|-------------|---------------|
| Astro I      | 1411      | 768         | 643           |
| Astro II     | 1690      | 792         | 898           |
| Endo         | 712       | 351         | 361           |
| Inh-PVALB I  | 296       | 244         | 52            |
| Inh-PVALB II | 13        | 11          | 2             |
| Inh-SST      | 368       | 245         | 123           |
| Inh-SV2C I   | 494       | 350         | 144           |
| Inh-SV2C II  | 2         | 1           | 1             |
| Inh-VIP      | 332       | 261         | 71            |
| L2 3-4       | 165       | 100         | 65            |
| L5 6 I       | 6         | 5           | 1             |
| L5 6 II      | 0         | 0           | 0             |
| Microglia    | 1443      | 699         | 744           |
| MOL          | 590       | 395         | 195           |
| Neu L4 I     | 239       | 209         | 30            |
| Neu L4 II    | 165       | 135         | 30            |
| Neu NRG1     | 1464      | 915         | 549           |
| Neu NTNG2    | 0         | 0           | 0             |
| OL I         | 1565      | 924         | 641           |
| OL II        | 1936      | 931         | 1005          |
| OPC          | 1907      | 894         | 1013          |

**Table S1:** Number of differentially expressed genes in frontal cortex clusters FXS vs control. Abbreviations as in Figure 1

| Cell_Type †  | DEG_Count † | Upreg_Count † | Downreg_Count † |
|--------------|-------------|---------------|-----------------|
| Astro I      | 385         | 223           | 162             |
| Astro II     | 691         | 371           | 320             |
| Endo         | 20          | 20            | 0               |
| Inh-PVALB I  | 280         | 144           | 136             |
| Inh-PVALB II | 173         | 64            | 109             |
| Inh-SST      | 248         | 118           | 130             |
| Inh-SV2C I   | 138         | 59            | 79              |
| Inh-SV2C II  | 116         | 55            | 61              |
| Inh-VIP      | 193         | 74            | 119             |
| L2 3-4       | 293         | 151           | 142             |
| L5 6 I       | 74          | 43            | 31              |
| L5 6 II      | 38          | 27            | 11              |
| Microglia    | 673         | 357           | 316             |
| MOL          | 421         | 179           | 242             |
| Neu L4 I     | 143         | 79            | 64              |
| Neu L4 II    | 142         | 78            | 64              |
| Neu NRG1     | 1540        | 900           | 640             |
| Neu NTNG2    | 278         | 179           | 99              |
| OL I         | 1557        | 930           | 627             |
| OL II        | 16          | 11            | 5               |
| OPC          | 453         | 241           | 212             |

**Table S2:** Number of differentially expressed genes in frontal cortex clusters premutation vs control.

| Cell_Type †  | DEG_Count † | Upreg_Count † | Downreg_Count † |
|--------------|-------------|---------------|-----------------|
| Astro I      | 1518        | 773           | 745             |
| Astro II     | 1986        | 1157          | 829             |
| Endo         | 211         | 123           | 88              |
| Inh-PVALB I  | 673         | 345           | 328             |
| Inh-PVALB II | 74          | 41            | 33              |
| Inh-SST      | 706         | 351           | 355             |
| Inh-SV2C I   | 687         | 323           | 364             |
| Inh-SV2C II  | 8           | 3             | 5               |
| Inh-VIP      | 704         | 274           | 430             |
| L2 3-4       | 518         | 257           | 261             |
| L5 6 I       | 52          | 21            | 31              |
| L5 6 II      | 2           | 0             | 2               |
| Microglia    | 1447        | 770           | 677             |
| MOL          | 1282        | 517           | 765             |
| Neu L4 I     | 447         | 192           | 255             |
| Neu L4 II    | 350         | 167           | 183             |
| Neu NRG1     | 252         | 107           | 145             |
| Neu NTNG2    | 15          | 4             | 11              |
| OL I         | 1987        | 1197          | 790             |
| OL II        | 781         | 362           | 419             |
| OPC          | 1709        | 940           | 769             |

**Table S3:** Number of differentially expressed genes in frontal cortex clusters premutation vs FXS.

| Cell_Type         | DEG_Count | Upreg_Count | Downreg_Count |
|-------------------|-----------|-------------|---------------|
| Astrocyte         | 867       | 408         | 459           |
| Bergmann<br>Glia  | 1176      | 667         | 509           |
| Endothelial       | 1         | 1           | 0             |
| Granule           | 816       | 532         | 284           |
| Interneuron<br>II | 216       | 105         | 111           |
| Interneuron       | 149       | 115         | 34            |
| Microglia         | 11        | 7           | 4             |
| Oligo             | 337       | 221         | 116           |
| OPC               | 202       | 152         | 50            |
| Purkinje          | 0         | 0           | 0             |

**Table S4:** Number of differentially expressed genes in cerebellum clusters FXS vs control.



| Cell_Type      | DEG_Count | Upreg_Count | Downreg_Count |
|----------------|-----------|-------------|---------------|
| Astrocyte      | 209       | 96          | 113           |
| Bergmann Glia  | 226       | 143         | 83            |
| Endothelial    | 3         | 2           | 1             |
| Granule        | 161       | 75          | 86            |
| Interneuron II | 336       | 128         | 208           |
| Interneuron    | 486       | 165         | 321           |
| Microglia      | 125       | 57          | 68            |
| Oligo          | 123       | 73          | 50            |
| OPC            | 38        | 29          | 9             |
| Purkinje       | 1         | 1           | 0             |

**Table S5:** Number of differentially expressed genes in cerebellum clusters premutation vs control.

| Cell_Type         | DEG_Count | Upreg_Count | Downreg_Count |
|-------------------|-----------|-------------|---------------|
| Astrocyte         | 1345      | 787         | 558           |
| Bergmann<br>Glia  | 1267      | 617         | 650           |
| Endothelial       | 1         | 1           | 0             |
| Granule           | 1024      | 425         | 599           |
| Interneuron<br>II | 540       | 172         | 368           |
| Interneuron       | 500       | 240         | 260           |
| Microglia         | 126       | 58          | 68            |
| Oligo             | 371       | 119         | 252           |
| OPC               | 360       | 143         | 217           |
| Purkinje          | 0         | 0           | 0             |

**Table S6:** Number of differentially expressed genes in cerebellum clusters premutation vs FXS.

|                 |                   | <b>Differential expression along the trajectory</b>           | <b>Differential expression between conditions</b> |
|-----------------|-------------------|---------------------------------------------------------------|---------------------------------------------------|
|                 | <b>Comparison</b> | <b>Genes selected (q-value &lt; 0.05, Moran's I &gt; 0.1)</b> | <b>Genes with the p.adj &lt; 0.05</b>             |
| <b>Branch 1</b> | FXPM vs CON       | 1042                                                          | 383                                               |
|                 | FXS vs CON        |                                                               | 436                                               |
|                 | FXPM vs FXS       |                                                               | 695                                               |
| <b>Branch 2</b> | FXPM vs CON       | 1000                                                          | 296                                               |
|                 | FXS vs CON        |                                                               | 741                                               |
|                 | FXPM vs FXS       |                                                               | 597                                               |

**Table S7:** Number of differentially expressed genes in pseudotime analysis.

| motif                                            | Tf_highConf                                                                                            | Tf_LowConf                                                                                                                                                                                       | NES  |
|--------------------------------------------------|--------------------------------------------------------------------------------------------------------|--------------------------------------------------------------------------------------------------------------------------------------------------------------------------------------------------|------|
| transfac_pro_M02771                              | IRF9 (inferredBy_Orthology)                                                                            | IRF5 (inferredBy_MotifSimilarity_n_Orthology)                                                                                                                                                    | 4.95 |
| factorbook_STAT2                                 | STAT1; STAT2 (directAnnotation)                                                                        | IRF1; IRF2; IRF3; IRF4; IRF5; IRF6; IRF7; IRF8; IRF9 (inferredBy_MotifSimilarity)                                                                                                                | 4.72 |
| jaspar_MAD0517.1                                 | STAT2 (directAnnotation)                                                                               | IRF1; IRF2; IRF3; IRF4; IRF5; IRF6; IRF7; IRF8; IRF9; STAT1 (inferredBy_MotifSimilarity)                                                                                                         | 4.19 |
| dbccordb_IRF1_ENC8R000EGK_1_m1                   | IRF1 (directAnnotation)                                                                                | ELF1; ETV6; GABPA; IRF2; IRF3; IRF4; IRF5; IRF6; IRF7; IRF8; IRF9; POLR2A; PRDM1; RELA; STAT1; STAT2; TBL1XR1 (inferredBy_MotifSimilarity) SPIB (inferredBy_MotifSimilarity_n_Orthology)         | 4    |
| cisbp_M6635                                      | STAT2 (directAnnotation)                                                                               | IRF1; IRF2; IRF3; IRF4; IRF5; IRF6; IRF7; IRF8; MTA3; STAT1 (inferredBy_MotifSimilarity)                                                                                                         | 3.94 |
| cisbp_M5572                                      | IRF3 (directAnnotation)                                                                                | IRF1; IRF2; IRF4; IRF5; IRF7; IRF8; IRF9; STAT1; STAT2 (inferredBy_MotifSimilarity)                                                                                                              | 3.93 |
| cisbp_M5580                                      | IRF9 (directAnnotation)                                                                                | IRF2; IRF3; IRF4; IRF5; IRF7; IRF8 (inferredBy_MotifSimilarity)                                                                                                                                  | 3.91 |
| taipale_IRF3_full_NIRRAAGGAACCGAAACTN_repr       | IRF3 (directAnnotation)                                                                                | IRF1; IRF2; IRF4; IRF5; IRF7; IRF8; IRF9; STAT1; STAT2 (inferredBy_MotifSimilarity)                                                                                                              | 3.87 |
| dbccordb_STAT1_ENC8R000FAU_1_m1                  | STAT1 (directAnnotation)                                                                               | EP300; IKZF1; IRF1; IRF2; IRF3; IRF4; IRF5; IRF6; IRF7; IRF8; IRF9; PRDM1; SPI1; STAT2; STAT3; TBL1XR1 (inferredBy_MotifSimilarity)                                                              | 3.82 |
| taipale_IRF9_full_AWCGAACCGAAACY                 | IRF9 (directAnnotation)                                                                                | IRF2; IRF3; IRF4; IRF5; IRF7; IRF8 (inferredBy_MotifSimilarity)                                                                                                                                  | 3.79 |
| hocomoco_IRF1_MOUSE.H11M0.D.A                    | IRF1 (inferredBy_Orthology)                                                                            | BC111A; EP300; IKZF1; IRF2; IRF3; IRF4; IRF5; IRF6; IRF7; IRF8; IRF9; MTA3; PRDM1; SPI1; SPIB; STAT1; STAT2; STAT3; TBL1XR1 (inferredBy_MotifSimilarity)                                         | 3.67 |
| taipale_IRF4_full_NCGAACCGAAACYN_repr            | IRF4 (directAnnotation)                                                                                | IRF2; IRF3; IRF5; IRF7; IRF8; IRF9 (inferredBy_MotifSimilarity)                                                                                                                                  | 3.66 |
| taipale_cyt_meth_IRF8_NYGAASYGAAAYN_FL           | IRF8 (directAnnotation)                                                                                | IRF1; IRF2; IRF3; IRF4; IRF5; IRF7; IRF9                                                                                                                                                         | 3.58 |
| cisbp_M6309                                      | IRF3 (directAnnotation)                                                                                | IRF1; IRF2; IRF4; IRF5; IRF6; IRF7; IRF8; IRF9; STAT1; STAT2 (inferredBy_MotifSimilarity)                                                                                                        | 3.57 |
| cisbp_M6485                                      | IRF3 (directAnnotation)                                                                                | SPI1; SPIB; SPIC (inferredBy_MotifSimilarity)                                                                                                                                                    | 3.56 |
| cisbp_M5579                                      | IRF8 (directAnnotation)                                                                                | IRF2; IRF3; IRF4; IRF5; IRF7; IRF9 (inferredBy_MotifSimilarity)                                                                                                                                  | 3.55 |
| taipale_IRF5_full_NCGAACCGAAACT                  | IRF5 (directAnnotation)                                                                                | IRF2; IRF3; IRF4; IRF5; IRF7; IRF9 (inferredBy_MotifSimilarity)                                                                                                                                  | 3.52 |
| tfimers_M000026                                  | IRF1; MYB (directAnnotation)                                                                           |                                                                                                                                                                                                  | 3.51 |
| neph_UW.Motif.0391                               |                                                                                                        |                                                                                                                                                                                                  | 3.49 |
| hocomoco_IRF2_HUMAN.H11M0.D.A                    | IRF2 (directAnnotation)                                                                                | BC111A; EP300; IKZF1; IRF1; IRF3; IRF4; IRF5; IRF6; IRF7; IRF8; IRF9; MTA3; PRDM1; SPI1; SPIB; STAT1; STAT2; STAT3; TBL1XR1 (inferredBy_MotifSimilarity)                                         | 3.46 |
| cisbp_M6277                                      | HLF (directAnnotation)                                                                                 | ATF2; CEBPB; CEBPD; DBP; NFIL3; TEF (inferredBy_MotifSimilarity) CECPA; CEBPG (inferredBy_MotifSimilarity_n_Orthology)                                                                           | 3.43 |
| taipale_cyt_meth_IRF9_NYGAASYGAAACYN_FL_meth     | IRF9 (directAnnotation)                                                                                | IRF1; IRF2; IRF3; IRF4; IRF5; IRF6; IRF7; IRF8 (inferredBy_MotifSimilarity)                                                                                                                      | 3.41 |
| cisbp_M0315                                      | CEBPB (inferredBy_Orthology)                                                                           | CECPA; CEBPD; CEBPE; CEBPG; EP300; HLF; PFARGC1A (inferredBy_MotifSimilarity) NFIL3 (inferredBy_MotifSimilarity_n_Orthology)                                                                     | 3.41 |
| homer_GAAAGTGAAGT_IRF1                           | IRF1 (directAnnotation)                                                                                | IRF2; IRF3; IRF4; IRF5; IRF7; IRF8; IRF9; PRDM1; RELA; STAT3; TBL1XR1 (inferredBy_MotifSimilarity)                                                                                               | 3.4  |
| cisbp_M1271                                      |                                                                                                        |                                                                                                                                                                                                  | 3.4  |
| taipale_cyt_meth_SPIB_RAWWGMGAAGTN_FL            | SPIB (directAnnotation)                                                                                | BC111A; ELF1; ELF2; ELF4; EP300; IKZF1; IRF4; IRF8; SPI1; SPIC (inferredBy_MotifSimilarity)                                                                                                      | 3.38 |
| cisbp_M5573                                      | IRF4 (directAnnotation)                                                                                | IRF2; IRF3; IRF5; IRF7; IRF8; IRF9 (inferredBy_MotifSimilarity)                                                                                                                                  | 3.38 |
| hocomoco_HLF_HUMAN.H11M0.D.C                     | HLF (directAnnotation)                                                                                 | ATF2; CEBPB; CEBPD; DBP; NFIL3; TEF (inferredBy_MotifSimilarity) CECPA; CEBPG (inferredBy_MotifSimilarity_n_Orthology)                                                                           | 3.35 |
| taipale_cyt_meth_IRF5_NYGAASYGAAACYN_FL          | IRF5 (directAnnotation)                                                                                | IRF1; IRF2; IRF3; IRF4; IRF7; IRF8; IRF9                                                                                                                                                         | 3.31 |
| taipale_HIF_DBD_NRTTACGTAAYN                     | HLF (inferredBy_Orthology)                                                                             | ATF2; CEBPE; DBP; NFIL3; TEF (inferredBy_MotifSimilarity) CECPA (inferredBy_MotifSimilarity_n_Orthology)                                                                                         | 3.3  |
| transfac_pro_M00772                              | IRF1; IRF2; IRF3; IRF4; IRF5; IRF6; IRF7; IRF8 (directAnnotation)                                      | BC111A; EP300; FOXM1; IRF9; MTA3; PRDM1; RELA; SPI1; STAT1; STAT2; TBL1XR1 (inferredBy_MotifSimilarity)                                                                                          | 3.29 |
| dbccordb_STAT1_ENC8R000DZV_1_m4                  | STAT1 (directAnnotation)                                                                               | IRF4; TBL1XR1 (inferredBy_MotifSimilarity)                                                                                                                                                       | 3.28 |
| transfac_pro_M06762                              | ZNF222 (directAnnotation)                                                                              |                                                                                                                                                                                                  | 3.28 |
| taipale_cyt_meth_IRF2_YGAAASYGAAAS_FL            | IRF2 (directAnnotation)                                                                                | IRF1; IRF3; IRF4; IRF5; IRF7; IRF8; IRF9 (inferredBy_MotifSimilarity)                                                                                                                            | 3.28 |
| transfac_pro_M06268                              | ZNF260 (directAnnotation)                                                                              |                                                                                                                                                                                                  | 3.27 |
| taipale_cyt_meth_IRF9_NYGAASYGAAACYN_FL          | IRF9 (directAnnotation)                                                                                | IRF1; IRF2; IRF3; IRF4; IRF5; IRF7; IRF8 (inferredBy_MotifSimilarity)                                                                                                                            | 3.27 |
| taipale_IRF7_DBD_NCGAANYGAAACYN_repr             | IRF7 (directAnnotation)                                                                                | IRF1; IRF2; IRF4; IRF8; IRF9 (inferredBy_MotifSimilarity) PRDM1 (inferredBy_MotifSimilarity_n_Orthology)                                                                                         | 3.26 |
| taipale_cyt_meth_IRF8_NYGAASYGAAASYN_eDBD        | IRF8 (directAnnotation)                                                                                | IRF1; IRF2; IRF3; IRF4; IRF5; IRF7; IRF9 (inferredBy_MotifSimilarity)                                                                                                                            | 3.26 |
| taipale_cyt_meth_IRF3_NSGAANSAGAAASGAAAN_FL_repr | IRF3 (directAnnotation)                                                                                | IRF1; IRF2; IRF4; IRF5; IRF7; IRF8; IRF9; STAT1; STAT2 (inferredBy_MotifSimilarity)                                                                                                              | 3.25 |
| transfac_pro_M05728                              |                                                                                                        | ZNF260 (inferredBy_MotifSimilarity)                                                                                                                                                              | 3.25 |
| dbccordb_POLR2A_ENC8R000ALH_1_m4                 | POLR2A (directAnnotation)                                                                              |                                                                                                                                                                                                  | 3.25 |
| transfac_pro_M00699                              | IRF8 (directAnnotation)                                                                                | IRF1; IRF2; IRF3; IRF4; IRF5; IRF6; IRF7; IRF9 (inferredBy_MotifSimilarity)                                                                                                                      | 3.24 |
| taipale_IRF8_DBD_NCGAACCGAAACY                   | IRF8 (directAnnotation)                                                                                | IRF2; IRF3; IRF4; IRF5; IRF7; IRF9 (inferredBy_MotifSimilarity)                                                                                                                                  | 3.24 |
| taipale_cyt_meth_IRF8_NYGAASYGAAAYN_FL_meth      | IRF8 (directAnnotation)                                                                                | IRF1; IRF2; IRF3; IRF4; IRF5; IRF6; IRF7; IRF9 (inferredBy_MotifSimilarity)                                                                                                                      | 3.22 |
| cisbp_M6024                                      | HLF (inferredBy_Orthology)                                                                             | ATF2; CEBPE; DBP; GMEB2; NFIL3; TEF (inferredBy_MotifSimilarity) CECPA (inferredBy_MotifSimilarity_n_Orthology)                                                                                  | 3.22 |
| transfac_pro_M02855                              | FOXJ3 (inferredBy_Orthology)                                                                           |                                                                                                                                                                                                  | 3.22 |
| hifn1_TFDNEM0000011                              |                                                                                                        |                                                                                                                                                                                                  | 3.22 |
| cisbp_M6308                                      | IRF2 (directAnnotation)                                                                                | IRF1; IRF3; IRF4; IRF5; IRF6; IRF7; IRF8; IRF9; PRDM1; STAT2 (inferredBy_MotifSimilarity)                                                                                                        | 3.21 |
| cisbp_M5578                                      | IRF8 (directAnnotation)                                                                                | IRF2; IRF3; IRF4; IRF5; IRF7; IRF9 (inferredBy_MotifSimilarity)                                                                                                                                  | 3.2  |
| tfimers_M000238                                  | BACH1; BACH2; E2F1; MAF; MAFK; MAFI; MAFG; MAFK; NFY2; NFY1; NFY2L1; NFY2L2; NFY2L3 (directAnnotation) |                                                                                                                                                                                                  | 3.2  |
| idmppm_shn                                       | HIVEP1; HIVEP2; HIVEP3; ZNF831 (inferredBy_Orthology)                                                  |                                                                                                                                                                                                  | 3.19 |
| dbccordb_IRF1_ENC8R000EGU_1_m1                   | IRF1 (directAnnotation)                                                                                | BC111A; EP300; IKZF1; IRF2; IRF3; IRF4; IRF5; IRF6; IRF7; IRF8; IRF9; MTA3; PRDM1; SPI1; STAT1; STAT2; STAT3; TBL1XR1 (inferredBy_MotifSimilarity) SPIB (inferredBy_MotifSimilarity_n_Orthology) | 3.19 |
| tfimers_M000598                                  | NKX2-2; TAF7; TBP (directAnnotation)                                                                   |                                                                                                                                                                                                  | 3.19 |
| dbccordb_IRF1_ENC8R000EGL_1_m1                   | IRF1 (directAnnotation)                                                                                | BC111A; EP300; IKZF1; IRF2; IRF3; IRF4; IRF5; IRF6; IRF7; IRF8; IRF9; MTA3; PRDM1; SPI1; STAT1; STAT2; STAT3; TBL1XR1 (inferredBy_MotifSimilarity) SPIB (inferredBy_MotifSimilarity_n_Orthology) | 3.17 |
| transfac_pro_M07045                              | IRF1 (directAnnotation)                                                                                | IRF2; IRF3; IRF4; IRF5; IRF6; IRF7; IRF8; IRF9; PRDM1; STAT1; STAT2 (inferredBy_MotifSimilarity)                                                                                                 | 3.15 |
| taipale_cyt_meth_IRF4_NYGAASYGAAAYN_FL           | IRF4 (directAnnotation)                                                                                | IRF1; IRF2; IRF3; IRF5; IRF7; IRF8; IRF9 (inferredBy_MotifSimilarity)                                                                                                                            | 3.15 |
| cisbp_M6307                                      | IRF1 (directAnnotation)                                                                                | IRF2; IRF3; IRF4; IRF5; IRF6; IRF7; IRF8; IRF9; PRDM1; STAT1; STAT2; STAT3; TBL1XR1 (inferredBy_MotifSimilarity)                                                                                 | 3.13 |
| dbccordb_STAT2_ENC8R000FBC_1_m1                  | STAT2 (directAnnotation)                                                                               | IRF1; IRF2; IRF3; IRF4; IRF5; IRF6; IRF7; IRF8; IRF9; MTA3; SPI1; STAT1; TBL1XR1 (inferredBy_MotifSimilarity)                                                                                    | 3.12 |
| transfac_pro_M07432                              | SOX2 (directAnnotation)                                                                                | SMAD1; SOX4 (inferredBy_MotifSimilarity)                                                                                                                                                         | 3.11 |
| cisbp_M4707                                      | STAT1 (directAnnotation)                                                                               | STAT2 (inferredBy_MotifSimilarity)                                                                                                                                                               | 3.1  |
| cisbp_M5576                                      | IRF7 (directAnnotation)                                                                                | IRF1; IRF2; IRF4; IRF8; IRF9 (inferredBy_MotifSimilarity) PRDM1 (inferredBy_MotifSimilarity_n_Orthology)                                                                                         | 3.09 |
| transfac_pro_M05305                              |                                                                                                        |                                                                                                                                                                                                  | 3.06 |
| transfac_pro_M02880                              | MAFK (inferredBy_Orthology)                                                                            |                                                                                                                                                                                                  | 3.05 |
| prefrem_n_Motif1219                              |                                                                                                        |                                                                                                                                                                                                  | 3.03 |
| taipale_TEF_FL_NRTTACGTAAYN                      | TEF (directAnnotation)                                                                                 | ATF2; DBP; HLF; NFIL3 (inferredBy_MotifSimilarity) CECPA; CEBPB (inferredBy_MotifSimilarity_n_Orthology)                                                                                         | 3.03 |
| transfac_pro_M08971                              | SOX15 (directAnnotation)                                                                               | NANOG; SMAD1 (inferredBy_MotifSimilarity) NANOGPB; SOX14; SOX18; SOX21; SOX4 (inferredBy_MotifSimilarity_n_Orthology)                                                                            | 3.03 |
| cisbp_M5864                                      |                                                                                                        | ELF2; ELF4; SPI1; SPIB; SPIC (inferredBy_MotifSimilarity) ETV6; ETV7 (inferredBy_MotifSimilarity_n_Orthology)                                                                                    | 3.01 |
| transfac_public_M00063                           | IRF2 (directAnnotation)                                                                                | IRF1; IRF3; IRF4; IRF5; IRF6; IRF7; IRF8; IRF9 (inferredBy_MotifSimilarity)                                                                                                                      | 3.01 |
| taipale_Dbp_DBD_NRTTACGTAAYN                     | DBP (inferredBy_Orthology)                                                                             | ATF2; CEBPB; CEBPD; CEBPE; CEBPG; HLF; NFIL3; TEF (inferredBy_MotifSimilarity) CECPA (inferredBy_MotifSimilarity_n_Orthology)                                                                    | 3    |

**Table S8:** Cortical Microglia output from RCisTarget for prenatation vs. control comparison.

| motif                                       | TF_highConf                           | TF_lowConf                                                                                                                                                                                                                                                                                                             | NES  |
|---------------------------------------------|---------------------------------------|------------------------------------------------------------------------------------------------------------------------------------------------------------------------------------------------------------------------------------------------------------------------------------------------------------------------|------|
| jaspar_MAO501.1                             | NFE2 (directAnnotation).              | ARID3A; BACH1; BACH2; EP300; FOS; FOSB; FOSL1; FOSL2; JUN; JUNB; JUND; MAF; MAFB; MAFK; MAFG; MAFK; NFE2L1; NFE2L2; NFE2L3 (inferredBy_MotifSimilarity).                                                                                                                                                               | 5.34 |
| factorbook_NFE2                             | NFE2 (directAnnotation).              | BACH1; BACH2; FOS; FOSB; FOSL1; FOSL2; JUN; JUNB; JUND; MAF; MAFB; MAFK; MAFG; MAFK; NFE2L1; NFE2L2; NFE2L3 (inferredBy_MotifSimilarity).                                                                                                                                                                              | 5.05 |
| cisbp_M4629                                 | NFE2 (directAnnotation).              | BACH1; BACH2; FOSL2; MAF; MAFB; MAFK; MAFG; MAFK; NFE2L1; NFE2L2; NFE2L3 (inferredBy_MotifSimilarity).                                                                                                                                                                                                                 | 4.92 |
| dbcorrdB_BACH1_ENCSR000EGD_1_m1             | BACH1 (directAnnotation).             | BACH2; EP300; FOS; FOSB; FOSL1; FOSL2; JUN; JUNB; JUND; MAF; MAFB; MAFK; MAFG; MAFK; NFE2; NFE2L1; NFE2L2; NFE2L3 (inferredBy_MotifSimilarity).                                                                                                                                                                        | 4.82 |
| dbcorrdB_NFE2_ENCSR000FAF_1_m1              | NFE2 (directAnnotation).              | BACH1; BACH2; FOS; FOSB; FOSL1; FOSL2; JUN; JUNB; JUND; MAF; MAFB; MAFK; MAFG; MAFK; NFE2L1; NFE2L2; NFE2L3 (inferredBy_MotifSimilarity).                                                                                                                                                                              | 4.75 |
| homer_AWWNTGCTGAGTCAT_Bach1                 | BACH1 (directAnnotation).             | ARID3A; BACH2; EP300; FOS; FOSB; FOSL1; FOSL2; JUN; JUNB; JUND; MAF; MAFB; MAFK; MAFG; MAFK; NFE2; NFE2L1; NFE2L2; NFE2L3 (inferredBy_MotifSimilarity).                                                                                                                                                                | 4.65 |
| hocomoco_NFE2_MOUSE.H11MO.0.A               |                                       | BACH1; BACH2; FOS; FOSB; FOSL1; FOSL2; JUN; JUNB; JUND; MAF; MAFB; MAFK; MAFG; MAFK; NFE2; NFE2L1; NFE2L2; NFE2L3 (inferredBy_MotifSimilarity).                                                                                                                                                                        | 4.64 |
| cisbp_M3617                                 | NFE2 (directAnnotation).              | BACH1; BACH2; FOS; FOSB; FOSL1; FOSL2; JUN; JUNB; JUND; MAF; MAFB; MAFK; MAFG; MAFK; NFE2L1; NFE2L2; NFE2L3 (inferredBy_MotifSimilarity); MAF (inferredBy_MotifSimilarity_n_Orthology).                                                                                                                                | 4.64 |
| cisbp_M6010                                 | FOXK1 (inferredBy_Orthology).         | FOXK3 (inferredBy_MotifSimilarity); FOXK2; FOXD1; FOXD2; FOXD3; FOXD4; FOXD4L1; FOXD4L3; FOXD4L4; FOXD4L5; FOXD4L6 (inferredBy_MotifSimilarity_n_Orthology).                                                                                                                                                           | 4.54 |
| hocomoco_NFE2L2_HUMAN.H11MO.0.A             | NFE2L2 (directAnnotation).            | BACH1; BACH2; FOS; FOSB; FOSL1; FOSL2; JUN; JUNB; JUND; MAF; MAFB; MAFK; MAFG; MAFK; NFE2; NFE2L1; NFE2L3 (inferredBy_MotifSimilarity).                                                                                                                                                                                | 4.49 |
| jaspar_MAO150.2                             | NFE2L2 (inferredBy_Orthology).        | BACH1; BACH2; FOS; FOSB; FOSL1; FOSL2; JUN; JUNB; JUND; MAF; MAFB; MAFK; MAFG; MAFK; NFE2; NFE2L1; NFE2L3 (inferredBy_MotifSimilarity).                                                                                                                                                                                | 4.48 |
| taipale_Foxc1_DBD_RTAAAYA_repr              | FOXK1 (inferredBy_Orthology).         | FOXK2; FOXD1; FOXD2; FOXD3; FOXD4; FOXD4L1; FOXD4L3; FOXD4L4; FOXD4L5; FOXD4L6 (inferredBy_MotifSimilarity_n_Orthology).                                                                                                                                                                                               | 4.45 |
| hocomoco_NFE2_HUMAN.H11MO.0.A               | NFE2 (directAnnotation).              | BACH1; BACH2; FOS; FOSB; FOSL1; FOSL2; JUN; JUNB; JUND; MAF; MAFB; MAFK; MAFG; MAFK; NFE2L1; NFE2L2; NFE2L3 (inferredBy_MotifSimilarity).                                                                                                                                                                              | 4.34 |
| homer_HTGCTGAGTCAT_Nr2                      | NFE2L2 (directAnnotation).            | BACH1; BACH2; FOS; FOSB; FOSL1; FOSL2; JUN; JUNB; JUND; MAF; MAFB; MAFK; MAFG; MAFK; NFE2; NFE2L1; NFE2L3; TCF12 (inferredBy_MotifSimilarity).                                                                                                                                                                         | 4.34 |
| homer_GATGACTCAGCA_NF-E2                    | NFE2 (directAnnotation).              | BACH1; BACH2; EP300; FOS; FOSB; FOSL1; FOSL2; JUN; JUNB; JUND; MAF; MAFB; MAFK; MAFG; MAFK; MEF2A; MEF2L1; NFE2L2; NFE2L3 (inferredBy_MotifSimilarity).                                                                                                                                                                | 4.34 |
| cisbp_M1966                                 | NFE2L2 (inferredBy_Orthology).        | BACH1; BACH2; FOS; FOSB; FOSL1; FOSL2; JUN; JUNB; JUND; MAF; MAFB; MAFK; MAFG; MAFK; NFE2; NFE2L1; NFE2L3 (inferredBy_MotifSimilarity).                                                                                                                                                                                | 4.21 |
| jaspar_MAO555.1                             |                                       | SRF (inferredBy_MotifSimilarity_n_Orthology).                                                                                                                                                                                                                                                                          | 4.15 |
| cisbp_M2348                                 |                                       | SRF (inferredBy_MotifSimilarity_n_Orthology).                                                                                                                                                                                                                                                                          | 4.12 |
| cisbp_M6016                                 | FOXJ3 (inferredBy_Orthology).         | FOXK2; FOXD2; FOXD3; FOXF1; FOXF2; FOXG1; FOXI1; FOXI2; FOXK1; FOXL1; FOXN2; FOXO1; FOXO3; FOXD4; FOXF1; FOXF2; FOXF3; FOXQ1 (inferredBy_MotifSimilarity); FOXD1; FOXD4; FOXD4L1; FOXD4L3; FOXD4L4; FOXD4L5; FOXD4L6; FOXI2; FOXI3; FOXK2; FOXN3; FOXO6; FOXP4 (inferredBy_MotifSimilarity_n_Orthology).               | 4.09 |
| transfac_pro_M03835                         | NFE2L2 (directAnnotation).            | BACH1; BACH2; FOSL1; MAF; MAFB; MAFK; MAFG; MAFK; NFE2; NFE2L1; NFE2L2; NFE2L3 (inferredBy_MotifSimilarity); NRF1 (inferredBy_MotifSimilarity).                                                                                                                                                                        | 4.08 |
| dbcorrdB_GTF2B_ENCSR000DOE_1_m1             | GTF2B (directAnnotation).             | GTF2F1; NLF; POLR2A; TAF1; TBP (inferredBy_MotifSimilarity); TBPL2 (inferredBy_MotifSimilarity_n_Orthology).                                                                                                                                                                                                           | 4.04 |
| taipale_Foxj3_DBD_RTAAACAA                  | FOXJ3 (inferredBy_Orthology).         | FOXK2; FOXD2; FOXF1; FOXF2; FOXG1; FOXI1; FOXI2; FOXK1; FOXL1; FOXN2; FOXO1; FOXO3; FOXD4; FOXF1; FOXF2; FOXF3; FOXQ1 (inferredBy_MotifSimilarity); FOXA2; FOXD1; FOXD3; FOXD4; FOXD4L1; FOXD4L3; FOXD4L4; FOXD4L5; FOXD4L6; FOXI2; FOXI3; FOXK2; FOXL2; FOXN3; FOXO6; FOXP4 (inferredBy_MotifSimilarity_n_Orthology). | 3.98 |
| cisbp_M5684                                 | NR3C2 (directAnnotation).             | AR; FOXA1; NR3C1 (inferredBy_MotifSimilarity); PGR (inferredBy_MotifSimilarity_n_Orthology).                                                                                                                                                                                                                           | 3.98 |
| swissregulon_hs_TBP.p2                      | TBP (directAnnotation).               | GTF2B; GTF2F1; POLR2A; TAF1 (inferredBy_MotifSimilarity); TBPL2 (inferredBy_MotifSimilarity_n_Orthology).                                                                                                                                                                                                              | 3.96 |
| cisbp_M1935                                 | NR3C1 (inferredBy_Orthology).         | AR; FOXA1; NR3C2; PGR (inferredBy_MotifSimilarity); HSF1; HSF2; HSF4 (inferredBy_MotifSimilarity_n_Orthology).                                                                                                                                                                                                         | 3.93 |
| cisbp_M5683                                 | NR3C1 (directAnnotation).             | AR; FOXA1; NR3C2; PGR (inferredBy_MotifSimilarity).                                                                                                                                                                                                                                                                    | 3.9  |
| taipale_AR_full_RRGWACANNNTGTWCY            | AR (directAnnotation).                | NR3C1; NR3C2 (inferredBy_MotifSimilarity).                                                                                                                                                                                                                                                                             | 3.88 |
| cisbp_M4440                                 | NR3C1 (directAnnotation).             | AR; FOXA1; PGR (inferredBy_MotifSimilarity); HSF1; HSF2; HSF4 (inferredBy_MotifSimilarity_n_Orthology).                                                                                                                                                                                                                | 3.88 |
| taipale_NR3C1_DBD_NRGWACANNNTGTWCYN         | NR3C1 (directAnnotation).             | AR; FOXA1; NR3C2; PGR (inferredBy_MotifSimilarity).                                                                                                                                                                                                                                                                    | 3.88 |
| cisbp_M6142                                 | AR (directAnnotation).                | FOXA1; NR3C1; PGR (inferredBy_MotifSimilarity); HSF1; HSF2; HSF4 (inferredBy_MotifSimilarity_n_Orthology).                                                                                                                                                                                                             | 3.85 |
| swissregulon_hs_NFE2.p2                     | NFE2 (directAnnotation).              | BACH1; BACH2; FOS; FOSB; FOSL1; FOSL2; JUN; JUNB; JUND; MAF; MAFB; MAFK; MAFG; MAFK; NFE2L1; NFE2L2; NFE2L3 (inferredBy_MotifSimilarity); MAF (inferredBy_MotifSimilarity_n_Orthology).                                                                                                                                | 3.85 |
| cisbp_M5289                                 | AR (directAnnotation).                | NR3C1; NR3C2 (inferredBy_MotifSimilarity).                                                                                                                                                                                                                                                                             | 3.84 |
| yetfasco_YMR042W_1483                       | SRF (inferredBy_Orthology).           |                                                                                                                                                                                                                                                                                                                        | 3.83 |
| cisbp_M4010                                 | TBP (directAnnotation).               | GTF2B; GTF2F1; POLR2A; TAF1 (inferredBy_MotifSimilarity); TBPL2 (inferredBy_MotifSimilarity_n_Orthology).                                                                                                                                                                                                              | 3.82 |
| jaspar_MAO108.2                             |                                       | GTF2B; GTF2F1; POLR2A; TAF1; TBP (inferredBy_MotifSimilarity); TBPL2 (inferredBy_MotifSimilarity_n_Orthology).                                                                                                                                                                                                         | 3.8  |
| factorbook_TBP                              | POLR2A; TAF1; TBP (directAnnotation). | GTF2B; GTF2F1; NLF (inferredBy_MotifSimilarity); TBPL2 (inferredBy_MotifSimilarity_n_Orthology).                                                                                                                                                                                                                       | 3.78 |
| taipale_NR3C2_DBD_NRGACANNNTGTNCYN          | NR3C2 (directAnnotation).             | AR; FOXA1; NR3C1 (inferredBy_MotifSimilarity); PGR (inferredBy_MotifSimilarity_n_Orthology).                                                                                                                                                                                                                           | 3.77 |
| dbcorrdB_FOXA1_ENCSR000BPX_1_m1             | FOXA1 (directAnnotation).             | AR; NR3C1; NR3C2; PGR (inferredBy_MotifSimilarity); HSF1; HSF2; HSF4 (inferredBy_MotifSimilarity_n_Orthology).                                                                                                                                                                                                         | 3.77 |
| homer_CTATAAAGCSV_TATA-box                  |                                       | POLR2A; TAF1; TBP (inferredBy_MotifSimilarity); TBPL2 (inferredBy_MotifSimilarity_n_Orthology).                                                                                                                                                                                                                        | 3.76 |
| cisbp_M6367                                 | NFE2 (directAnnotation).              | BACH1; BACH2; FOS; FOSB; FOSL1; FOSL2; JUN; JUNB; JUND; MAF; MAFB; MAFK; MAFG; MAFK; NFE2L1; NFE2L2; NFE2L3 (inferredBy_MotifSimilarity).                                                                                                                                                                              | 3.75 |
| elemento_GCGGCC                             |                                       |                                                                                                                                                                                                                                                                                                                        | 3.73 |
| transfac_pro_M02263                         | NFE2L2 (directAnnotation).            | BACH1; BACH2; EP300; JUN; MAF; MAFK; MAFK; NFE2; NFE2L1 (inferredBy_MotifSimilarity); MAF (inferredBy_MotifSimilarity_n_Orthology).                                                                                                                                                                                    | 3.64 |
| dbcorrdB_GTF2F1_ENCSR000EHC_1_m1            | GTF2F1 (directAnnotation).            | GTF2B; NLF; POLR2A; TAF1; TBP (inferredBy_MotifSimilarity); TBPL2 (inferredBy_MotifSimilarity_n_Orthology).                                                                                                                                                                                                            | 3.63 |
| cisbp_M5460                                 | FOXK1 (directAnnotation).             | FOXK2; FOXD2; FOXF1; FOXF2; FOXG1; FOXI1; FOXI2; FOXK1; FOXL1; FOXN2; FOXO1; FOXO3; FOXD4; FOXF1; FOXF2; FOXF3; FOXQ1 (inferredBy_MotifSimilarity); FOXD1; FOXD3; FOXD4; FOXD4L1; FOXD4L3; FOXD4L4; FOXD4L5; FOXD4L6; FOXI3; FOXL2; FOXF1; FOXF3; FOXF4 (inferredBy_MotifSimilarity_n_Orthology).                      | 3.62 |
| transfac_pro_M01240                         | GTF2IRD1 (directAnnotation).          |                                                                                                                                                                                                                                                                                                                        | 3.62 |
| stark_STATAWARSVV                           | TBP; TBPL2 (inferredBy_Orthology).    | POLR2A; TAF1 (inferredBy_MotifSimilarity).                                                                                                                                                                                                                                                                             | 3.6  |
| neph_UW.Motif.0510                          |                                       |                                                                                                                                                                                                                                                                                                                        | 3.59 |
| swissregulon_hs_FOXP3.p2                    | FOXP3 (directAnnotation).             |                                                                                                                                                                                                                                                                                                                        | 3.59 |
| hdpi_RBM35A                                 | ESRP1 (directAnnotation).             |                                                                                                                                                                                                                                                                                                                        | 3.58 |
| tdimers_MD00384                             | IKZF2; STAT1 (directAnnotation).      |                                                                                                                                                                                                                                                                                                                        | 3.57 |
| neph_UW.Motif.0241                          |                                       |                                                                                                                                                                                                                                                                                                                        | 3.54 |
| transfac_pro_M09383                         |                                       |                                                                                                                                                                                                                                                                                                                        | 3.53 |
| jaspar_MAO548.1                             | SDEF (inferredBy_Orthology).          | MEF2A; MEF2C (inferredBy_MotifSimilarity).                                                                                                                                                                                                                                                                             | 3.53 |
| transfac_pro_M02915                         |                                       |                                                                                                                                                                                                                                                                                                                        | 3.51 |
| predrem_nrMotif1009                         |                                       |                                                                                                                                                                                                                                                                                                                        | 3.51 |
| dbcorrdB_PPARGC1A_ENCSR000EEQ_1_m1          | PPARGC1A (directAnnotation).          | HSF1; HSF2; HSF4 (inferredBy_MotifSimilarity).                                                                                                                                                                                                                                                                         | 3.5  |
| taipale_FOXK1_full_RTAAAYA                  | FOXK1 (directAnnotation).             | FOXK2; FOXD2; FOXF1; FOXF2; FOXG1; FOXI1; FOXI2; FOXK1; FOXL1; FOXN2; FOXO1; FOXO3; FOXD4; FOXD4L1; FOXD4L3; FOXD4L4; FOXD4L5; FOXD4L6; FOXI3; FOXL2; FOXF1; FOXF3; FOXF4 (inferredBy_MotifSimilarity_n_Orthology).                                                                                                    | 3.48 |
| yetfasc_YMR280C_33                          |                                       |                                                                                                                                                                                                                                                                                                                        | 3.48 |
| taipale_cyt_meth_NR3C1_NGWACANNNTGTWCN_eBDD | NR3C1 (directAnnotation).             | AR; FOXA1; NR3C2 (inferredBy_MotifSimilarity).                                                                                                                                                                                                                                                                         | 3.48 |
| transfac_pro_M09233                         |                                       | HSF1 (inferredBy_MotifSimilarity).                                                                                                                                                                                                                                                                                     | 3.47 |
| homer_CCTTTTATAGCC_TATA-Box                 |                                       | GTF2B; GTF2F1; NLF (inferredBy_MotifSimilarity); TBP (inferredBy_MotifSimilarity_n_Orthology).                                                                                                                                                                                                                         | 3.45 |

**Table S9:** Cerebellar Bergmann Glia output from RCisTarget for prenatation vs. control comparison. Continued on next page.



| CBL         | Estimated Number of Cells | Mean Reads per Cell | Median Genes per Cell | Number of Reads | Valid Barcodes | Sequencing Saturation | Q30 Bases in Barcode | Q30 Bases in RNA Read | Q30 Bases in UMI | Reads Mapped to Genome |
|-------------|---------------------------|---------------------|-----------------------|-----------------|----------------|-----------------------|----------------------|-----------------------|------------------|------------------------|
| 1793        | 4,701                     | 56,278              | 3,524                 | 264,564,211     | 95.40%         | 60.10%                | 91.80%               | 93.00%                | 76.50%           | 95.70%                 |
| 5497        | 5,566                     | 70,949              | 3,126                 | 394,904,625     | 97.50%         | 80.60%                | 91.70%               | 87.30%                | 91.50%           | 95.10%                 |
| 5541        | 5,360                     | 90,127              | 3,704                 | 483,082,020     | 96.40%         | 78.10%                | 91.50%               | 87.50%                | 91.40%           | 94.40%                 |
| 5657        | 5,764                     | 92,365              | 3,372                 | 532,394,454     | 97.30%         | 80.20%                | 95.40%               | 92.40%                | 95.10%           | 95.90%                 |
| AN10723     | 6,372                     | 46,761              | 2,571                 | 297,964,738     | 97.50%         | 75.90%                | 95.90%               | 91.80%                | 95.40%           | 93.30%                 |
| 4806        | 4,645                     | 90,352              | 2,154                 | 419,682,889     | 97.10%         | 88.30%                | 90.70%               | 86.00%                | 90.80%           | 93.70%                 |
| 5319        | 5,674                     | 71,804              | 3,746                 | 407,415,252     | 96.60%         | 71.30%                | 91.60%               | 87.60%                | 91.50%           | 94.80%                 |
| 4555        | 3,944                     | 70,778              | 2,652                 | 279,149,167     | 97.60%         | 82.00%                | 95.90%               | 92.00%                | 95.50%           | 92.30%                 |
| 4664        | 4,741                     | 47,939              | 2,737                 | 227,279,509     | 97.40%         | 71.30%                | 91.00%               | 86.30%                | 90.80%           | 94.20%                 |
| 5006        | 4,670                     | 35,863              | 3,107                 | 167,481,681     | 96.60%         | 55.80%                | 91.20%               | 86.50%                | 91.00%           | 94.40%                 |
| 5212        | 5,070                     | 49,632              | 3,002                 | 251,631,846     | 95.80%         | 61.40%                | 91.90%               | 93.50%                | 76.40%           | 96.10%                 |
| 5746        | 5,166                     | 41,978              | 2,909                 | 216,860,497     | 96.00%         | 60.10%                | 92.60%               | 94.00%                | 77.70%           | 96.50%                 |
| 4751        | 4,821                     | 117,130             | 3,534                 | 564,684,721     | 97.20%         | 85.40%                | 95.30%               | 92.40%                | 95.10%           | 95.70%                 |
|             |                           |                     |                       |                 |                |                       |                      |                       |                  |                        |
|             |                           |                     |                       |                 |                |                       |                      |                       |                  |                        |
| CTX         | Estimated Number of Cells | Mean Reads per Cell | Median Genes per Cell | Number of Reads | Valid Barcodes | Sequencing Saturation | Q30 Bases in Barcode | Q30 Bases in RNA Read | Q30 Bases in UMI | Reads Mapped to Genome |
| 1793        | 3,073                     | 74,963              | 3,159                 | 230,363,514     | 95.70%         | 65.50%                | 98.40%               | 91.80%                | 98.40%           | 95.70%                 |
| 5408        | 4,389                     | 59,487              | 3,028                 | 261,092,263     | 97.60%         | 67.40%                | 95.90%               | 91.90%                | 95.50%           | 94.10%                 |
| 5497        | 5,557                     | 72,214              | 3,029                 | 401,292,261     | 97.20%         | 76.50%                | 90.80%               | 85.90%                | 90.80%           | 94.50%                 |
| 5541        | 5,077                     | 81,152              | 3,992                 | 412,009,797     | 96.80%         | 67.20%                | 91.60%               | 87.90%                | 91.50%           | 94.70%                 |
| 5657        | 4,897                     | 103,724             | 4,178                 | 507,936,830     | 97.50%         | 66.70%                | 95.40%               | 92.20%                | 95.10%           | 95.90%                 |
| 4806        | 4,517                     | 88,308              | 2,796                 | 398,886,965     | 97.00%         | 81.90%                | 90.80%               | 85.80%                | 90.80%           | 94.10%                 |
| 5319        | 5,333                     | 87,892              | 3,525                 | 468,728,034     | 96.90%         | 70.30%                | 91.60%               | 87.70%                | 91.50%           | 94.70%                 |
| 5746 (BA22) | 2,393                     | 109,360             | 3,954                 | 261,698,719     | 96.00%         | 59.80%                | 91.70%               | 93.50%                | 76.30%           | 94.90%                 |
| 4555        | 2,739                     | 112,219             | 3,500                 | 307,367,917     | 97.70%         | 78.60%                | 95.90%               | 91.60%                | 95.50%           | 91.80%                 |
| 4664        | 2,542                     | 80,464              | 2,641                 | 204,540,615     | 97.30%         | 75.60%                | 91.10%               | 86.20%                | 90.90%           | 93.90%                 |
| 4751        | 3,443                     | 177,604             | 4,142                 | 611,491,905     | 97.20%         | 84.90%                | 95.30%               | 92.20%                | 95.10%           | 95.40%                 |
| 5006        | 3,956                     | 44,910              | 2,846                 | 177,663,948     | 97.00%         | 44.90%                | 91.00%               | 86.10%                | 90.80%           | 93.70%                 |
| 5529        | 4,233                     | 69,880              | 4,048                 | 295,802,824     | 95.50%         | 43.00%                | 91.90%               | 93.60%                | 76.60%           | 96.20%                 |

**Table S10:** Metrics raw output from Cell Ranger pipeline for samples.

**Supplemental Information File 1.** Linear regression was used to assess the effect of premutation condition and age on premutation and control groups using the equation

$$y = \beta_0 + \beta_1 x_1 + \beta_2 x_2$$

$$\text{Nuclei Cluster \%} = \beta_0 + \beta_1 * \text{condition} + \beta_2 * \text{age}$$

### Cortex

#### Excitatory Neurons

| Parameter estimates | Variable  | Estimate | Standard error | 95% CI (asymptotic) | t      | P value | P value summary |
|---------------------|-----------|----------|----------------|---------------------|--------|---------|-----------------|
| $\beta_0$           | Intercept | -0.9146  | 6.818          | -17.04 to 15.21     | 0.1341 | 0.8971  | ns              |
| $\beta_1$           | Group[PM] | -1.886   | 6.698          | -17.72 to 13.95     | 0.2815 | 0.7864  | ns              |
| $\beta_2$           | Age       | 0.2333   | 0.1024         | -0.008771 to 0.4754 | 2.279  | 0.0567  | ns              |

#### Inhibitory Neurons

| Parameter estimates | Variable  | Estimate | Standard error | 95% CI (asymptotic) | t     | P value | P value summary |
|---------------------|-----------|----------|----------------|---------------------|-------|---------|-----------------|
| $\beta_0$           | Intercept | 7.891    | 3.971          | -1.500 to 17.28     | 1.987 | 0.0873  | ns              |
| $\beta_1$           | Group[PM] | -6.573   | 3.901          | -15.80 to 2.652     | 1.685 | 0.1359  | ns              |
| $\beta_2$           | Age       | 0.1398   | 0.05963        | -0.001238 to 0.2808 | 2.344 | 0.0516  | ns              |

#### Astrocyte I

| Parameter estimates | Variable  | Estimate | Standard error | 95% CI (asymptotic) | t     | P value | P value summary |
|---------------------|-----------|----------|----------------|---------------------|-------|---------|-----------------|
| $\beta_0$           | Intercept | 18.84    | 2.779          | 12.26 to 25.41      | 6.778 | 0.0003  | ***             |
| $\beta_1$           | Group[PM] | -9.903   | 2.730          | -16.36 to -3.447    | 3.627 | 0.0084  | **              |
| $\beta_2$           | Age       | -0.05304 | 0.04173        | -0.1517 to 0.04563  | 1.271 | 0.2443  | ns              |

#### Astrocyte II

| Parameter estimates | Variable | Estimate | Standard error | 95% CI (asymptotic) | t | P value | P value summary |
|---------------------|----------|----------|----------------|---------------------|---|---------|-----------------|
|---------------------|----------|----------|----------------|---------------------|---|---------|-----------------|



|           |           |          |         |                     |       |        |     |
|-----------|-----------|----------|---------|---------------------|-------|--------|-----|
| $\beta_0$ | Intercept | 7.704    | 1.198   | 4.871 to 10.54      | 6.431 | 0.0004 | *** |
| $\beta_1$ | Group[PM] | -3.501   | 1.177   | -6.284 to -0.7179   | 2.975 | 0.0207 | *   |
| $\beta_2$ | Age       | -0.02099 | 0.01799 | -0.06352 to 0.02155 | 1.167 | 0.2815 | ns  |

### Mature Oligodendrocytes

| Parameter estimates | Variable  | Estimate | Standard error | 95% CI (asymptotic) | t      | P value | P value summary |
|---------------------|-----------|----------|----------------|---------------------|--------|---------|-----------------|
| $\beta_0$           | Intercept | 5.296    | 11.57          | -22.06 to 32.66     | 0.4577 | 0.6610  | ns              |
| $\beta_1$           | Group[PM] | 20.44    | 11.37          | -6.435 to 47.32     | 1.799  | 0.1151  | ns              |
| $\beta_2$           | Age       | 0.2323   | 0.1737         | -0.1785 to 0.6431   | 1.337  | 0.2231  | ns              |

### OPC

| Parameter estimates | Variable  | Estimate | Standard error | 95% CI (asymptotic) | t     | P value | P value summary |
|---------------------|-----------|----------|----------------|---------------------|-------|---------|-----------------|
| $\beta_0$           | Intercept | 21.66    | 2.683          | 15.32 to 28.01      | 8.074 | <0.0001 | ****            |
| $\beta_1$           | Group[PM] | 4.463    | 2.636          | -1.770 to 10.70     | 1.693 | 0.1343  | ns              |
| $\beta_2$           | Age       | -0.2454  | 0.04029        | -0.3407 to -0.1501  | 6.091 | 0.0005  | ***             |

### Microglia

| Parameter estimates | Variable  | Estimate | Standard error | 95% CI (asymptotic) | t      | P value | P value summary |
|---------------------|-----------|----------|----------------|---------------------|--------|---------|-----------------|
| $\beta_0$           | Intercept | 21.57    | 3.523          | 13.24 to 29.90      | 6.124  | 0.0005  | ***             |
| $\beta_1$           | Group[PM] | -0.6021  | 3.461          | -8.785 to 7.581     | 0.1740 | 0.8668  | ns              |
| $\beta_2$           | Age       | -0.1671  | 0.05289        | -0.2921 to -0.04198 | 3.158  | 0.0160  | *               |

### Endothelial

| Parameter estimates | Variable  | Estimate | Standard error | 95% CI (asymptotic) | t     | P value | P value summary |
|---------------------|-----------|----------|----------------|---------------------|-------|---------|-----------------|
| $\beta_0$           | Intercept | 0.7394   | 0.2675         | 0.1070 to 1.372     | 2.765 | 0.0279  | *               |
| $\beta_1$           | Group[PM] | -0.3206  | 0.2628         | -0.9419 to 0.3007   | 1.220 | 0.2619  | ns              |

|           |     |           |          |                      |        |        |    |
|-----------|-----|-----------|----------|----------------------|--------|--------|----|
| $\beta_2$ | Age | -0.003812 | 0.004016 | -0.01331 to 0.005685 | 0.9491 | 0.3742 | ns |
|-----------|-----|-----------|----------|----------------------|--------|--------|----|

**Inhibitory Neuron Density (Inhibitory/Total Neuron percentage)**

| Parameter estimates | Variable  | Estimate  | Standard error | 95% CI (asymptotic)     | t      | P value | P value summary |
|---------------------|-----------|-----------|----------------|-------------------------|--------|---------|-----------------|
| $\beta_0$           | Intercept | 0.7645    | 0.05505        | 0.6343 to 0.8947        | 13.89  | <0.0001 | ****            |
| $\beta_1$           | Group[PM] | -0.05218  | 0.05408        | -0.1801 to 0.07569      | 0.9650 | 0.3667  | ns              |
| $\beta_2$           | Age       | -0.002581 | 0.0008265      | -0.004535 to -0.0006263 | 3.122  | 0.0168  | *               |

**Cerebellum**

**Purkinje**

| Parameter estimates | Variable       | Estimate | Standard error | 95% CI (asymptotic)   | t      | P value | P value summary |
|---------------------|----------------|----------|----------------|-----------------------|--------|---------|-----------------|
| $\beta_0$           | Intercept      | 0.1047   | 0.1228         | -0.1785 to 0.3880     | 0.8525 | 0.4187  | ns              |
| $\beta_1$           | Condition[PM ] | -0.1568  | 0.08565        | -0.3543 to 0.04070    | 1.831  | 0.1045  | ns              |
| $\beta_2$           | Age            | 0.001808 | 0.001735       | -0.002194 to 0.005810 | 1.042  | 0.3279  | ns              |

**Bergmann Glia**

| Parameter estimates | Variable       | Estimate | Standard error | 95% CI (asymptotic) | t     | P value | P value summary |
|---------------------|----------------|----------|----------------|---------------------|-------|---------|-----------------|
| $\beta_0$           | Intercept      | 4.594    | 1.552          | 1.014 to 8.174      | 2.959 | 0.0182  | *               |
| $\beta_1$           | Condition[PM ] | 2.378    | 1.082          | -0.1182 to 4.874    | 2.197 | 0.0593  | ns              |
| $\beta_2$           | Age            | -0.03712 | 0.02193        | -0.08769 to 0.01346 | 1.692 | 0.1290  | ns              |

**Granule**

| Parameter estimates | Variable      | Estimate | Standard error | 95% CI (asymptotic) | t      | P value | P value summary |
|---------------------|---------------|----------|----------------|---------------------|--------|---------|-----------------|
| $\beta_0$           | Intercept     | 87.25    | 4.912          | 75.92 to 98.57      | 17.76  | <0.0001 | ****            |
| $\beta_1$           | Condition[PM] | -6.366   | 3.425          | -14.26 to 1.531     | 1.859  | 0.1001  | ns              |
| $\beta_2$           | Age           | 0.05032  | 0.06939        | -0.1097 to 0.2103   | 0.7252 | 0.4890  | ns              |

### OPC

| Parameter estimates | Variable      | Estimate | Standard error | 95% CI (asymptotic)   | t     | P value | P value summary |
|---------------------|---------------|----------|----------------|-----------------------|-------|---------|-----------------|
| $\beta_0$           | Intercept     | 1.564    | 0.5186         | 0.3680 to 2.760       | 3.016 | 0.0167  | *               |
| $\beta_1$           | Condition[PM] | 0.6912   | 0.3616         | -0.1427 to 1.525      | 1.911 | 0.0923  | ns              |
| $\beta_2$           | Age           | -0.01629 | 0.007327       | -0.03319 to 0.0006017 | 2.224 | 0.0568  | ns              |

### Astrocyte

| Parameter estimates | Variable      | Estimate  | Standard error | 95% CI (asymptotic) | t       | P value | P value summary |
|---------------------|---------------|-----------|----------------|---------------------|---------|---------|-----------------|
| $\beta_0$           | Intercept     | 1.084     | 0.3860         | 0.1943 to 1.974     | 2.809   | 0.0229  | *               |
| $\beta_1$           | Condition[PM] | 0.01825   | 0.2691         | -0.6023 to 0.6388   | 0.06780 | 0.9476  | ns              |
| $\beta_2$           | Age           | -0.002173 | 0.005453       | -0.01475 to 0.01040 | 0.3984  | 0.7008  | ns              |

### Oligodendrocyte

| Parameter estimates | Variable      | Estimate  | Standard error | 95% CI (asymptotic) | t      | P value | P value summary |
|---------------------|---------------|-----------|----------------|---------------------|--------|---------|-----------------|
| $\beta_0$           | Intercept     | 1.382     | 0.5098         | 0.2067 to 2.558     | 2.711  | 0.0266  | *               |
| $\beta_1$           | Condition[PM] | 0.5364    | 0.3554         | -0.2833 to 1.356    | 1.509  | 0.1697  | ns              |
| $\beta_2$           | Age           | 0.0008881 | 0.007202       | -0.01750 to 0.01572 | 0.1233 | 0.9049  | ns              |

**Microglia**

| Parameter estimates | Variable       | Estimate  | Standard error | 95% CI (asymptotic) | t      | P value | P value summary |
|---------------------|----------------|-----------|----------------|---------------------|--------|---------|-----------------|
| $\beta_0$           | Intercept      | 1.069     | 0.4512         | 0.02846 to 2.109    | 2.369  | 0.0453  | *               |
| $\beta_1$           | Condition[PM ] | 0.1759    | 0.3146         | -0.5495 to 0.9014   | 0.5592 | 0.5913  | ns              |
| $\beta_2$           | Age            | -0.004652 | 0.006375       | -0.01935 to 0.01005 | 0.7298 | 0.4863  | ns              |

**Interneuron I**

| Parameter estimates | Variable      | Estimate | Standard error | 95% CI (asymptotic) | t      | P value | P value summary |
|---------------------|---------------|----------|----------------|---------------------|--------|---------|-----------------|
| $\beta_0$           | Intercept     | 1.028    | 1.057          | -1.409 to 3.466     | 0.9728 | 0.3591  | ns              |
| $\beta_1$           | Condition[PM] | 1.007    | 0.7371         | -0.6927 to 2.707    | 1.366  | 0.2090  | ns              |
| $\beta_2$           | Age           | 0.01240  | 0.01494        | -0.02204 to 0.04684 | 0.8301 | 0.4306  | ns              |

**Interneuron II**

| Parameter estimates | Variable      | Estimate  | Standard error | 95% CI (asymptotic) | t      | P value | P value summary |
|---------------------|---------------|-----------|----------------|---------------------|--------|---------|-----------------|
| $\beta_0$           | Intercept     | 1.708     | 1.187          | -1.030 to 4.446     | 1.439  | 0.1882  | ns              |
| $\beta_1$           | Condition[PM] | 1.837     | 0.8279         | -0.07257 to 3.746   | 2.218  | 0.0573  | ns              |
| $\beta_2$           | Age           | -0.005094 | 0.01677        | -0.04378 to 0.03359 | 0.3037 | 0.7691  | ns              |

## Supplemental Information File 2

Cerebellar top 20 terms for enriched biological processes (BP) and Kyoto Encyclopedia of Genes and Genomes (KEGG) terms for each cellular population with each condition comparison, potential terms of particular interest highlighted with red box.

# Astrocyte

## GO\_BP

## Top 20

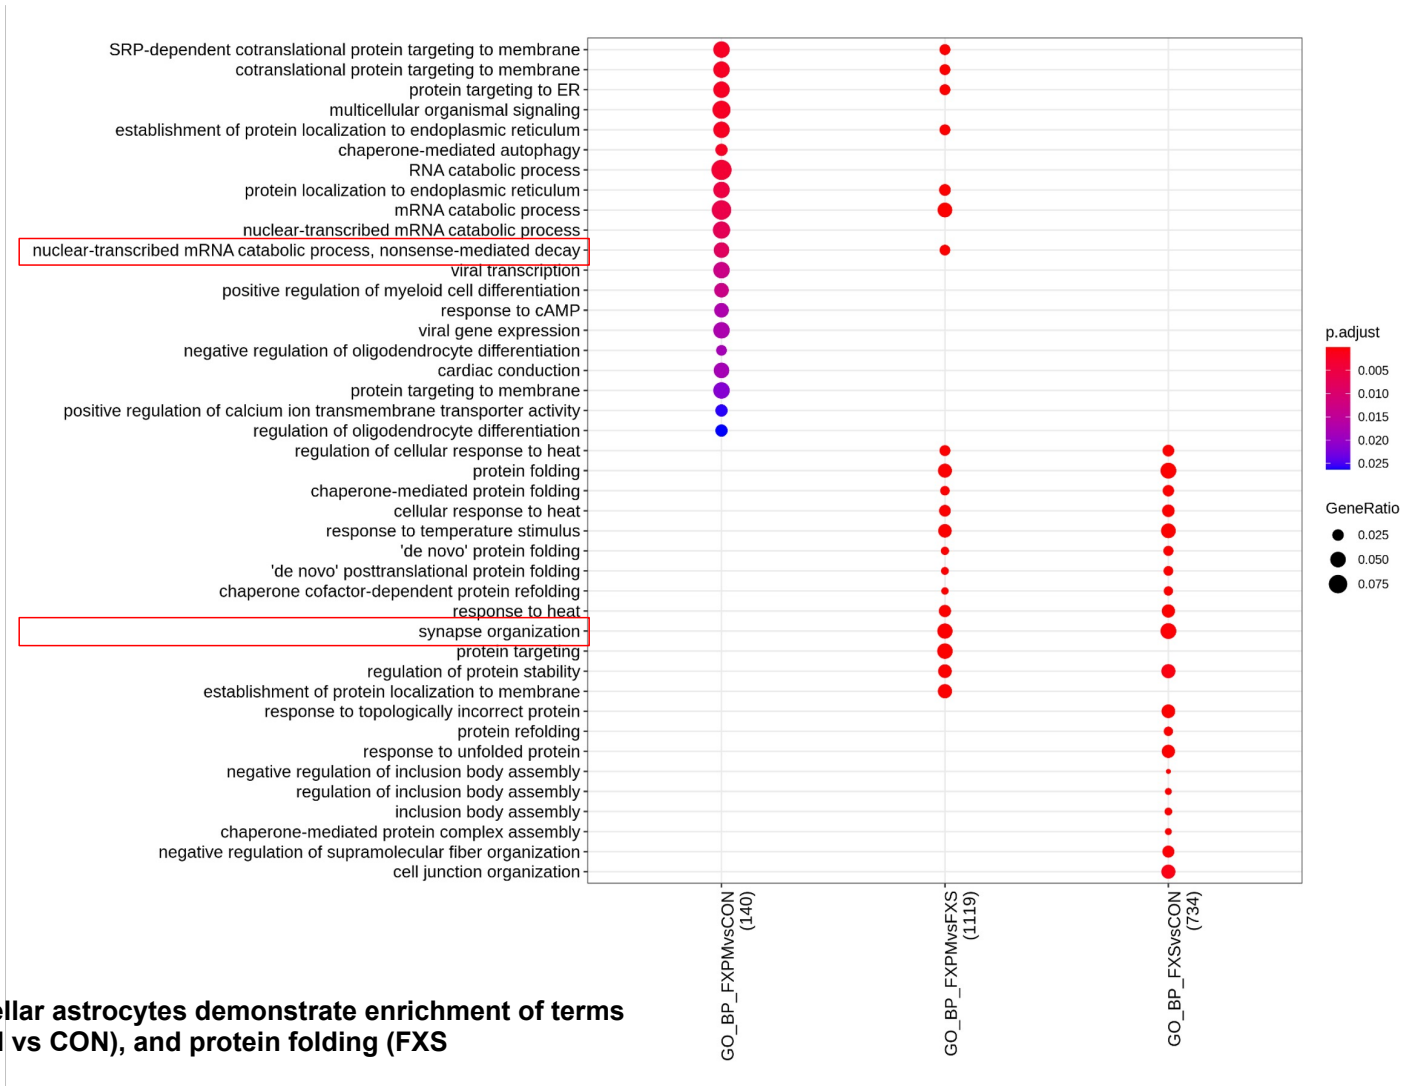

# Astrocyte

## KEGG

### Top 20

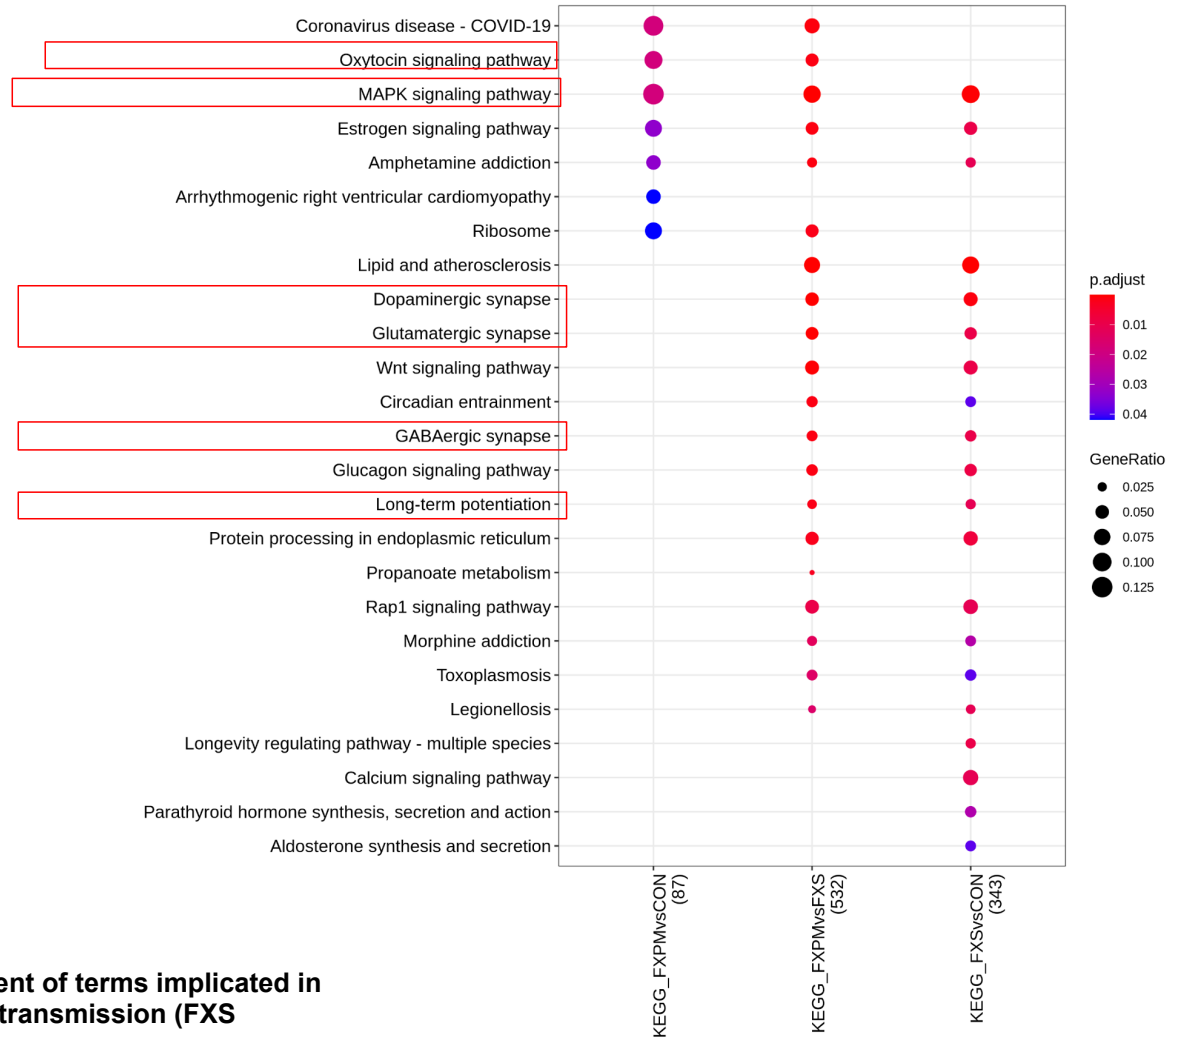

KEGG for cerebellar astrocytes demonstrate enrichment of terms implicated in MAPK signaling (PM & FXS comparisons), and neurotransmission (FXS comparisons).

# Bergmann Glia

## GO\_BP

## Top 20

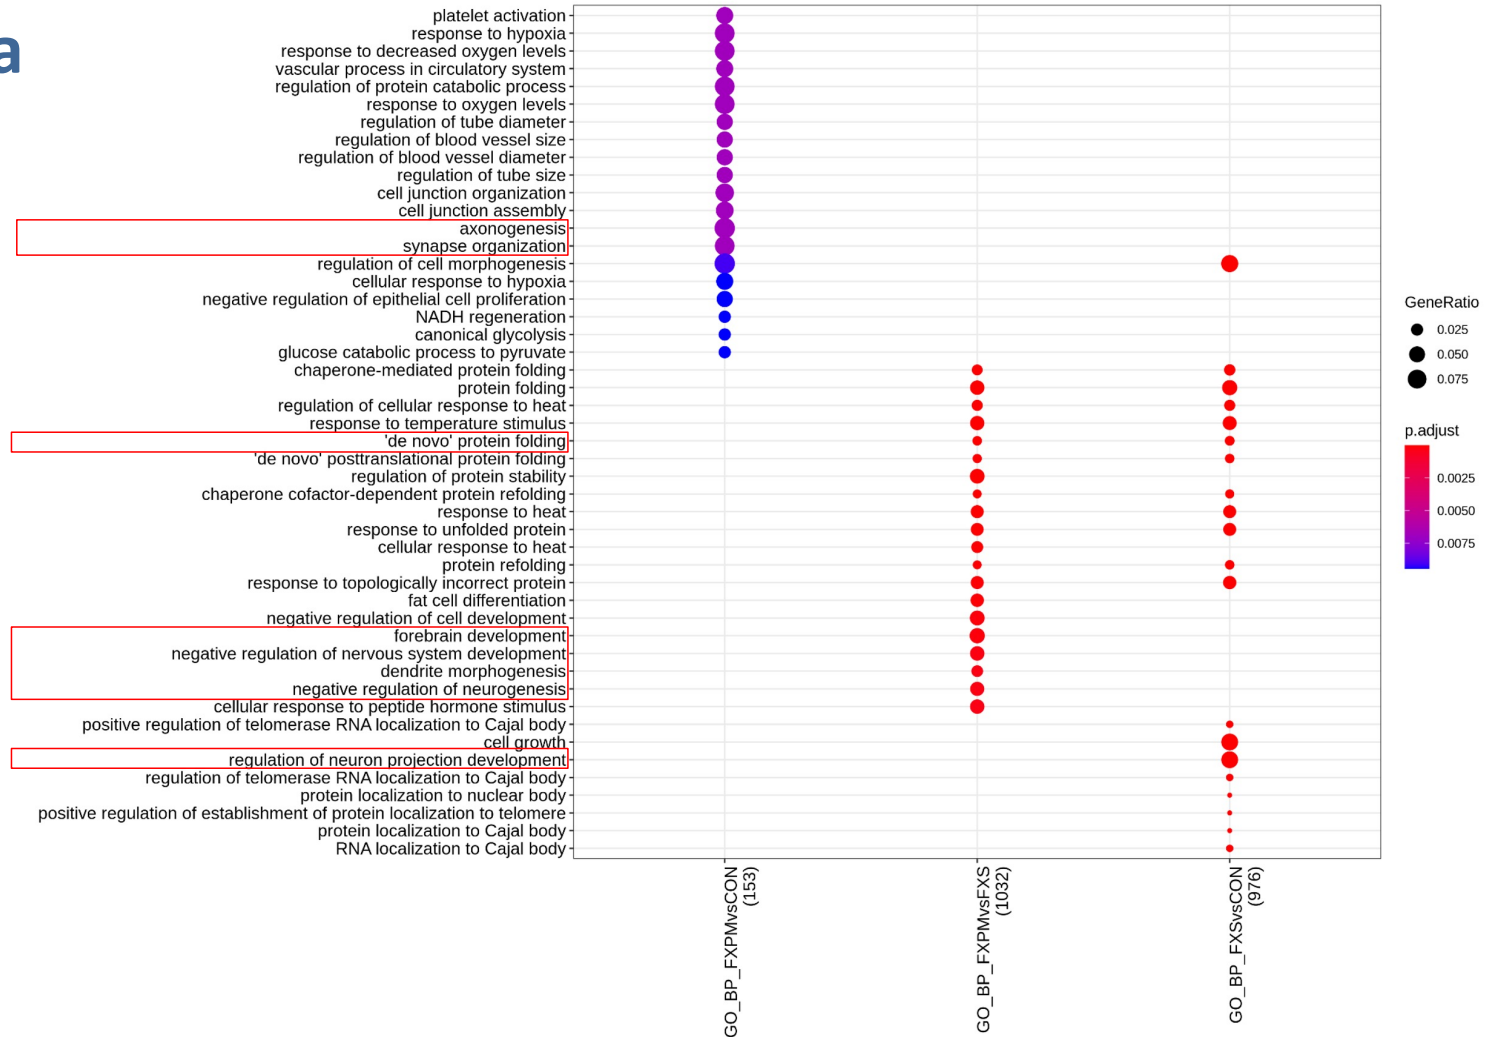

GO Biological Processes for cerebellar Bergmann glia demonstrate enrichment of hypoxia and vascular terms (PM comparisons), and protein folding (FXS comparisons).



# Bergmann Glia

## KEGG

## Top 20

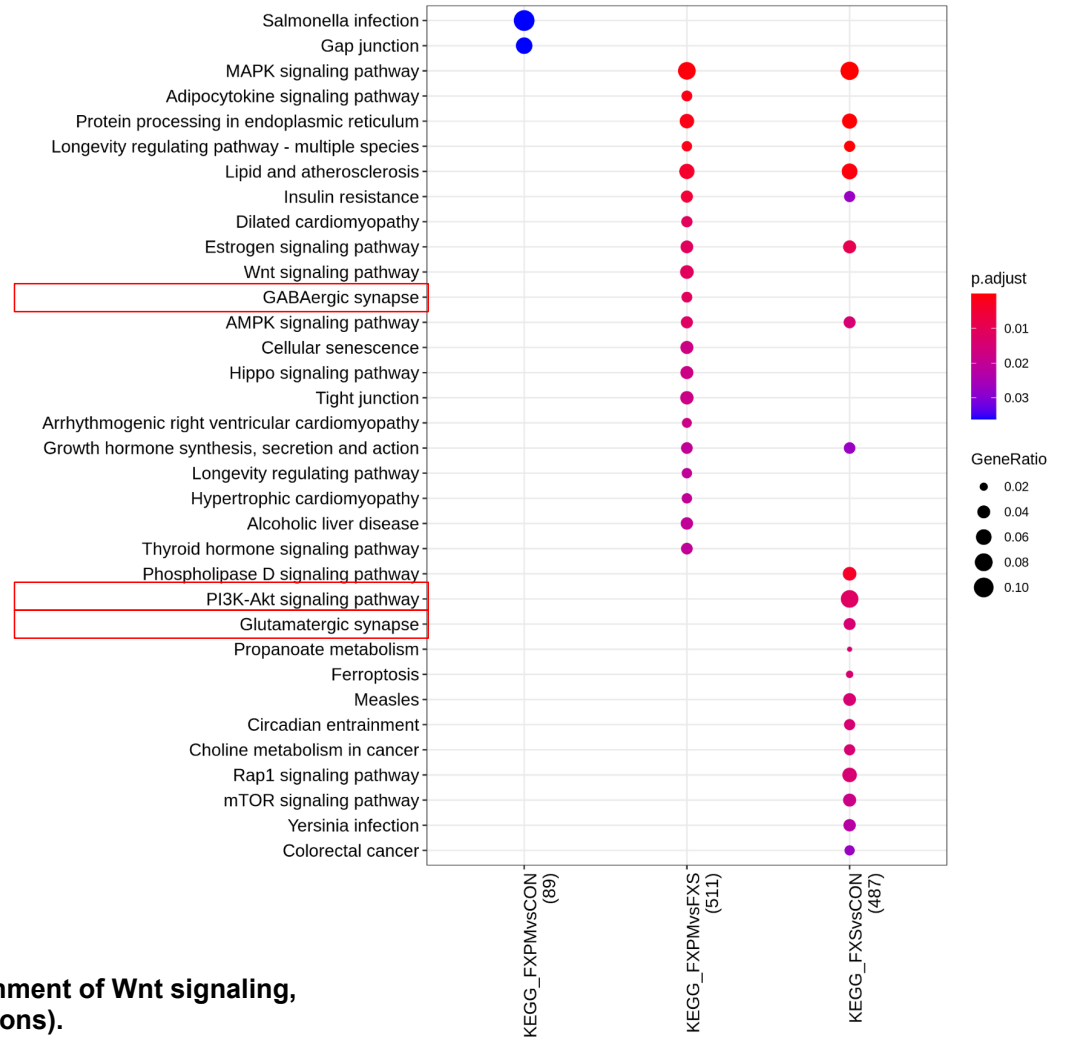

KEGG for cerebellar Bergmann glia demonstrate enrichment of Wnt signaling, PI3K-Akt signaling, and MAPK signaling (FXS comparisons).

# Endothelial

## GO\_BP

## Top 20

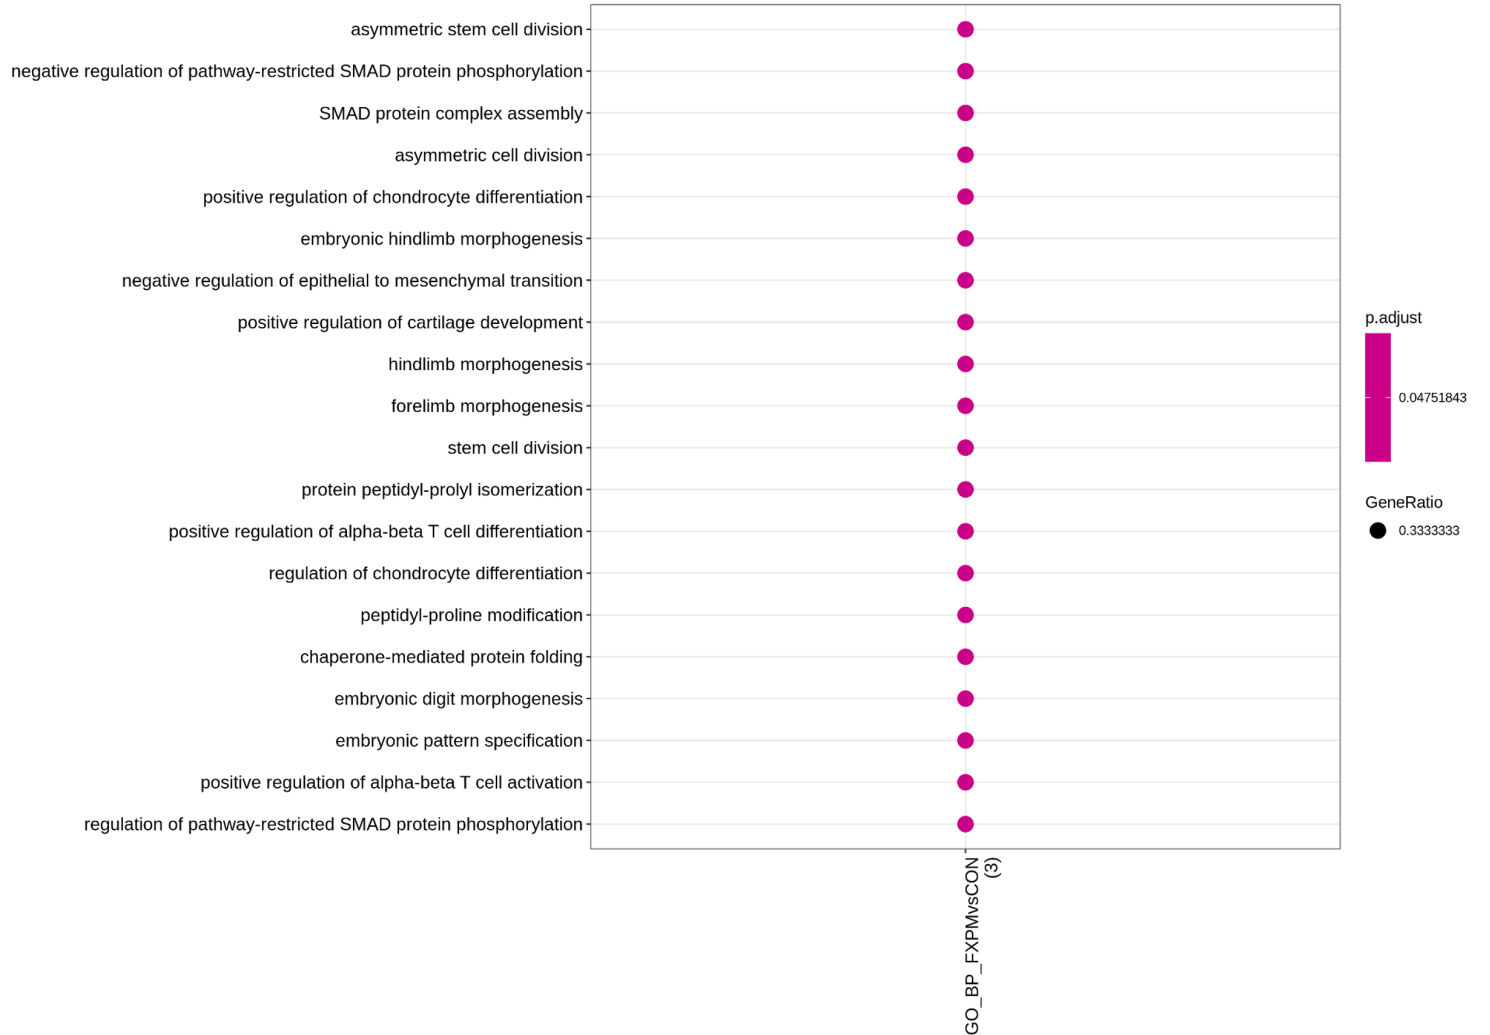

**GO Biological Processes for endothelial cells demonstrate enrichment of development/morphogenesis and protein folding (PM comparisons).**

# Endothelial

## KEGG

### Top 20

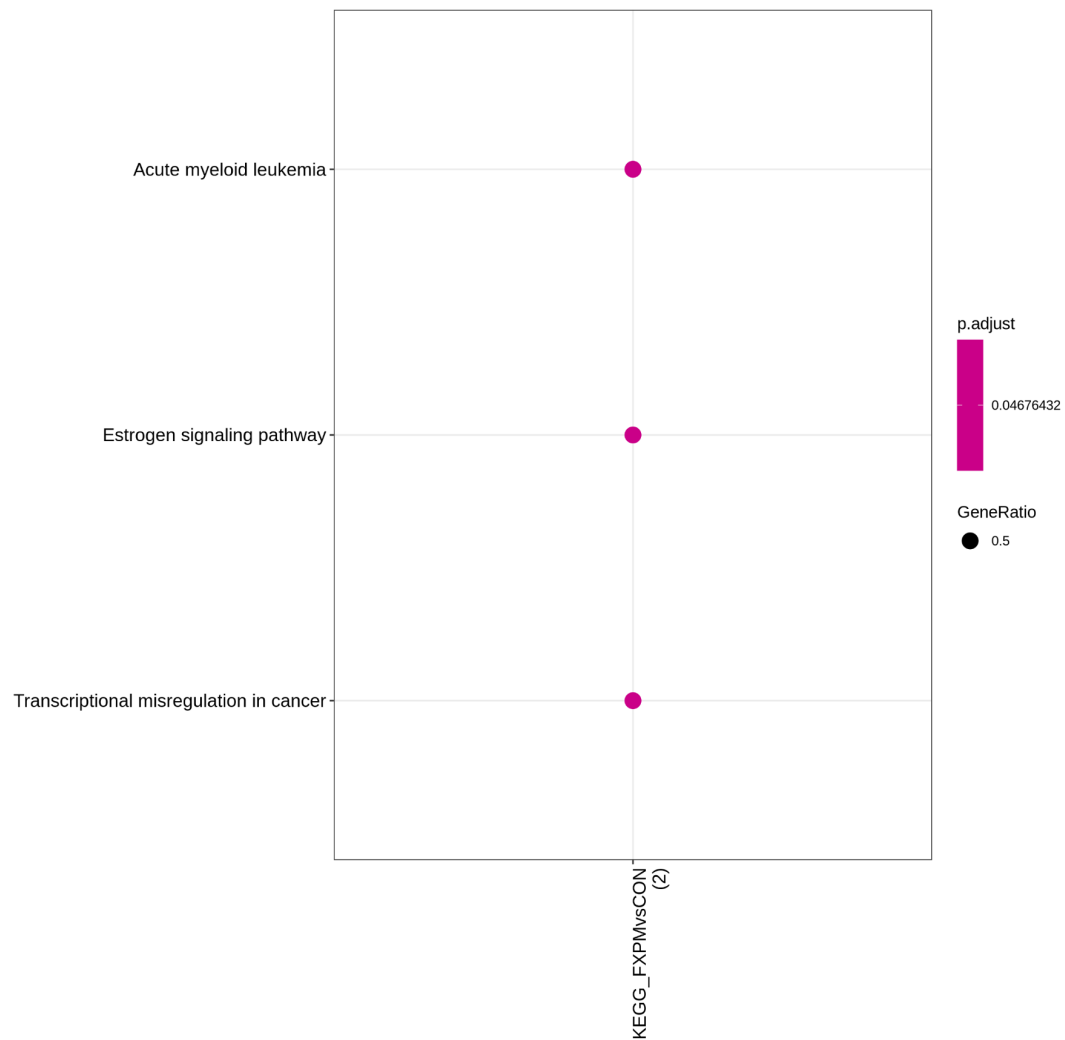

# Granule

## GO\_BP

## Top 20

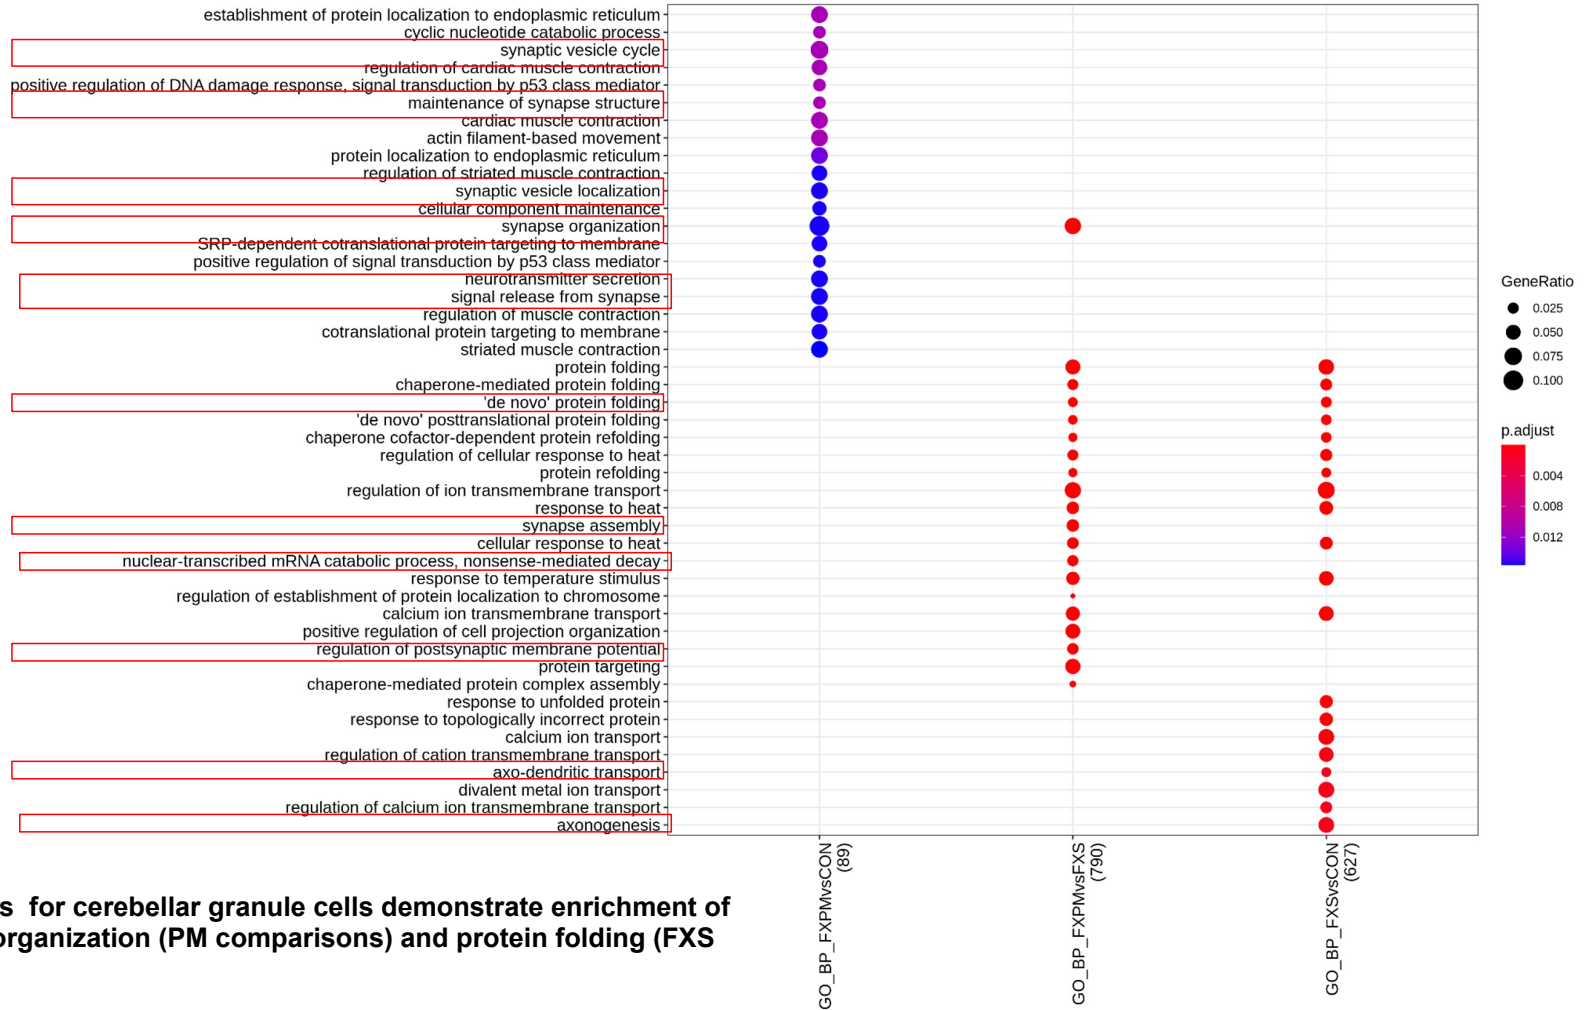

GO Biological Processes for cerebellar granule cells demonstrate enrichment of synaptic structure and organization (PM comparisons) and protein folding (FXS comparisons).

# Granule

# KEGG

# Top 20

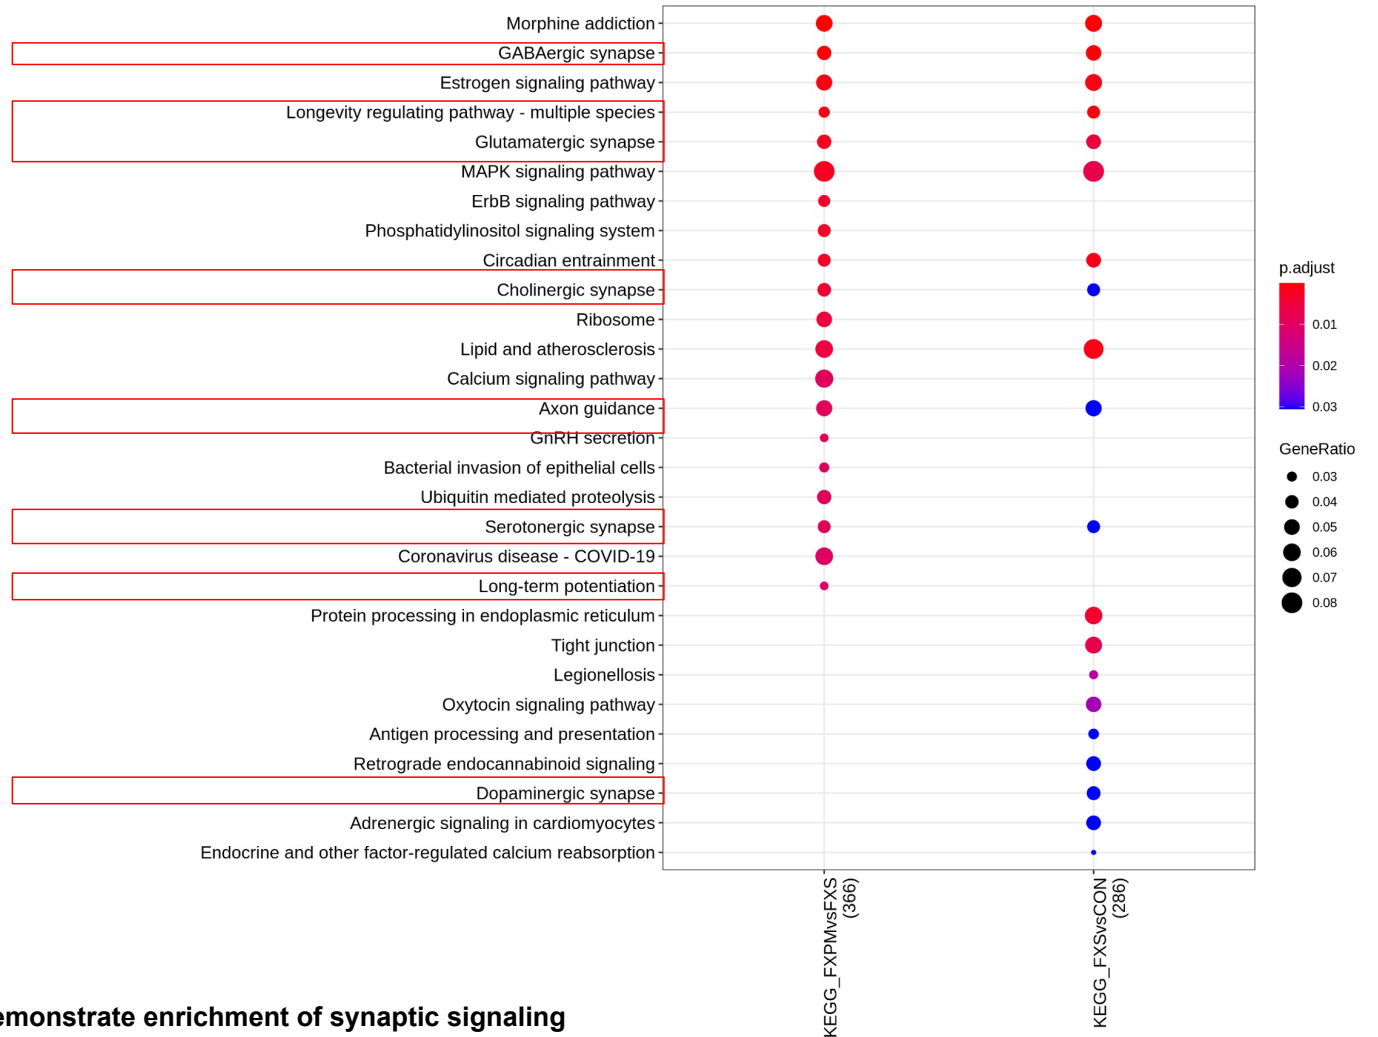

KEGG for cerebellar granule cells demonstrate enrichment of synaptic signaling (PM and FXS comparisons).

# Interneuron

## GO\_BP

## Top 20

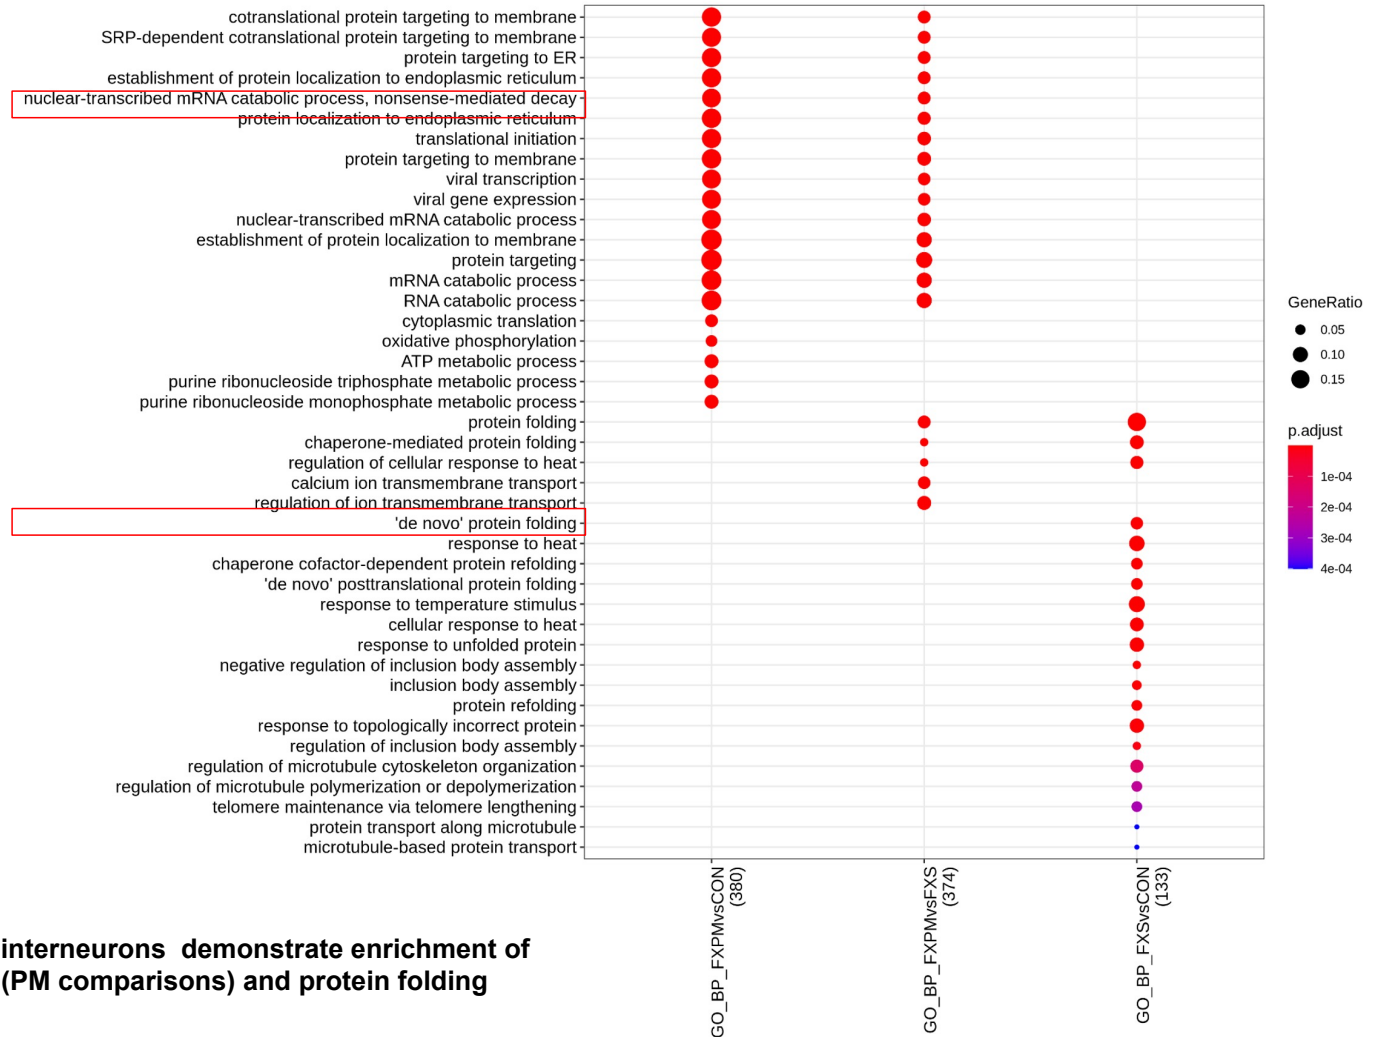

GO Biological Processes for cerebellar interneurons demonstrate enrichment of mRNA catabolism and protein targeting (PM comparisons) and protein folding (FXS comparisons).

# Interneuron

## KEGG

### Top 20

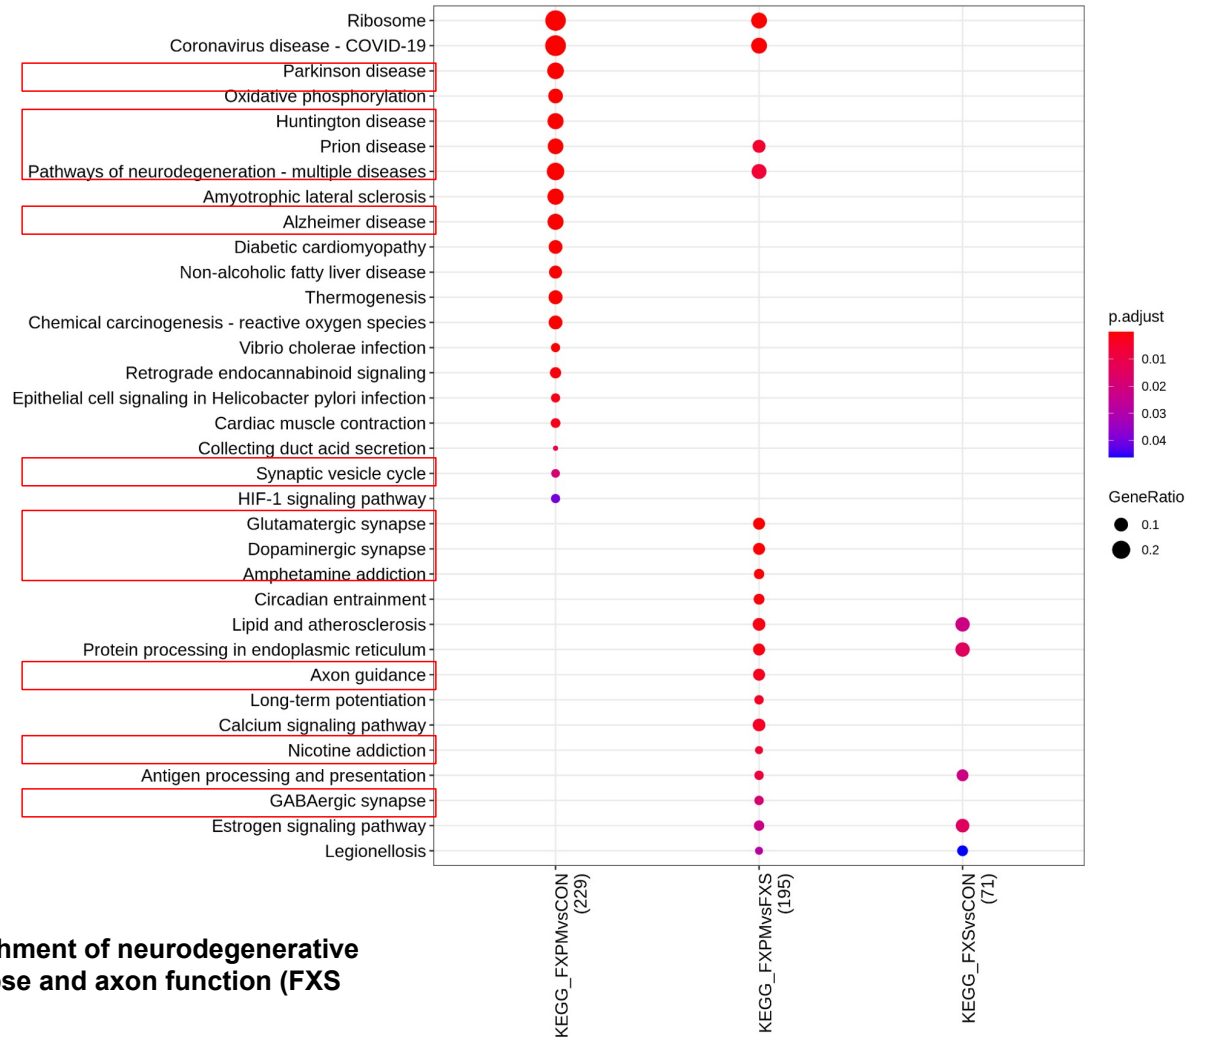

KEGG for cerebellar interneurons demonstrate enrichment of neurodegenerative terms and prion disease (PM comparisons) and synapse and axon function (FXS comparisons).

# Interneuron II

## GO\_BP

## Top 20

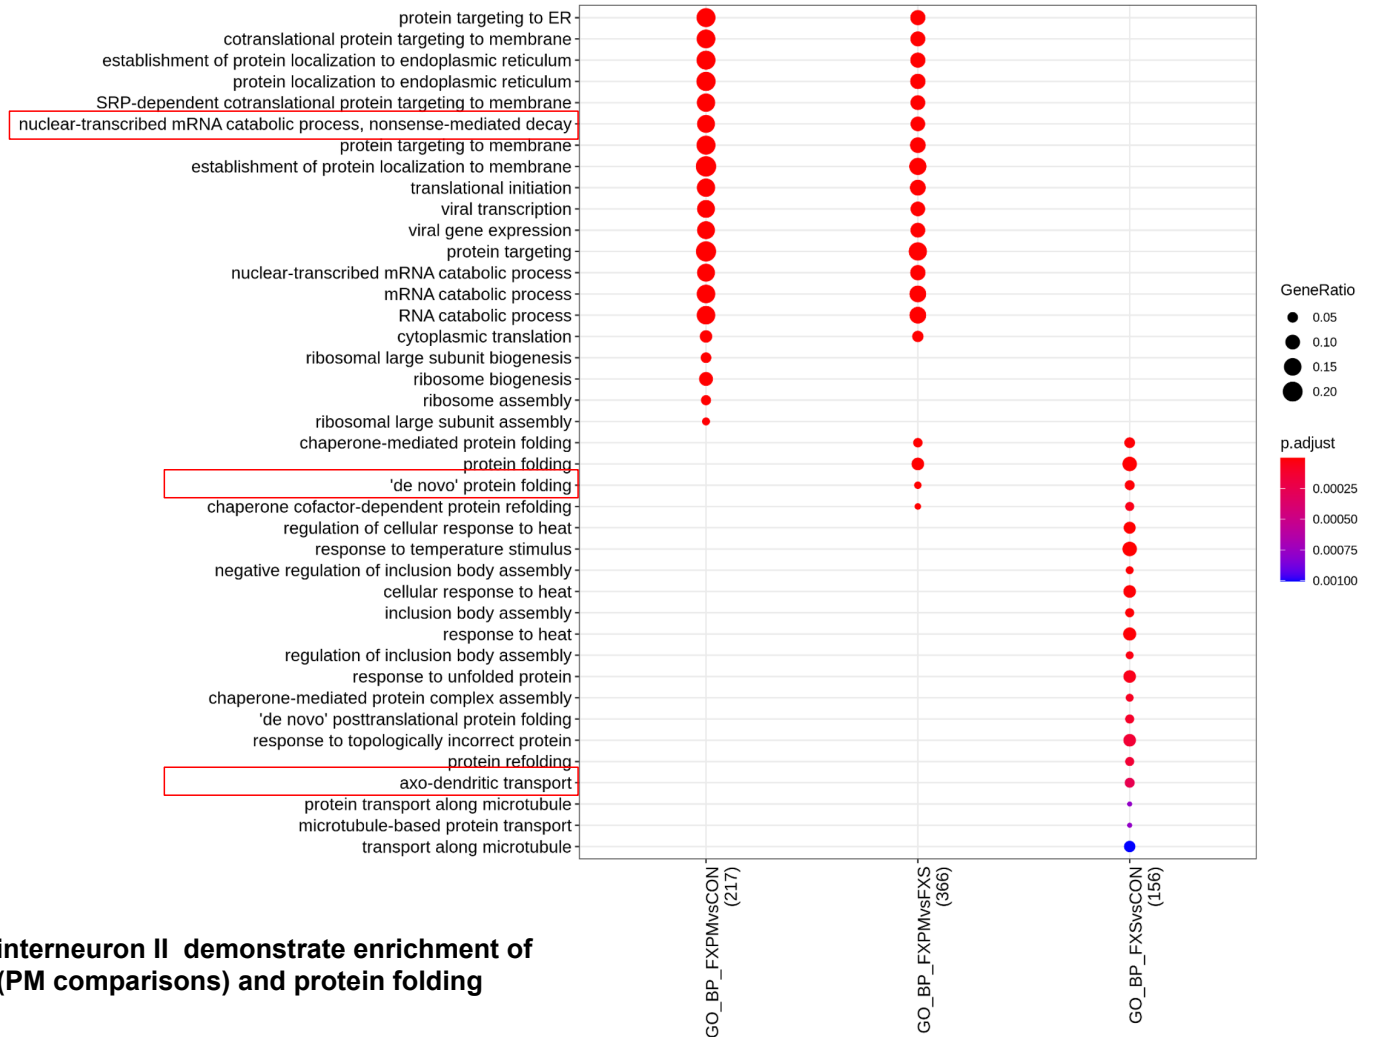

GO Biological Processes for cerebellar interneuron II demonstrate enrichment of mRNA catabolism and protein targeting (PM comparisons) and protein folding (FXS comparisons).



# Interneuron II

## KEGG

### Top 20

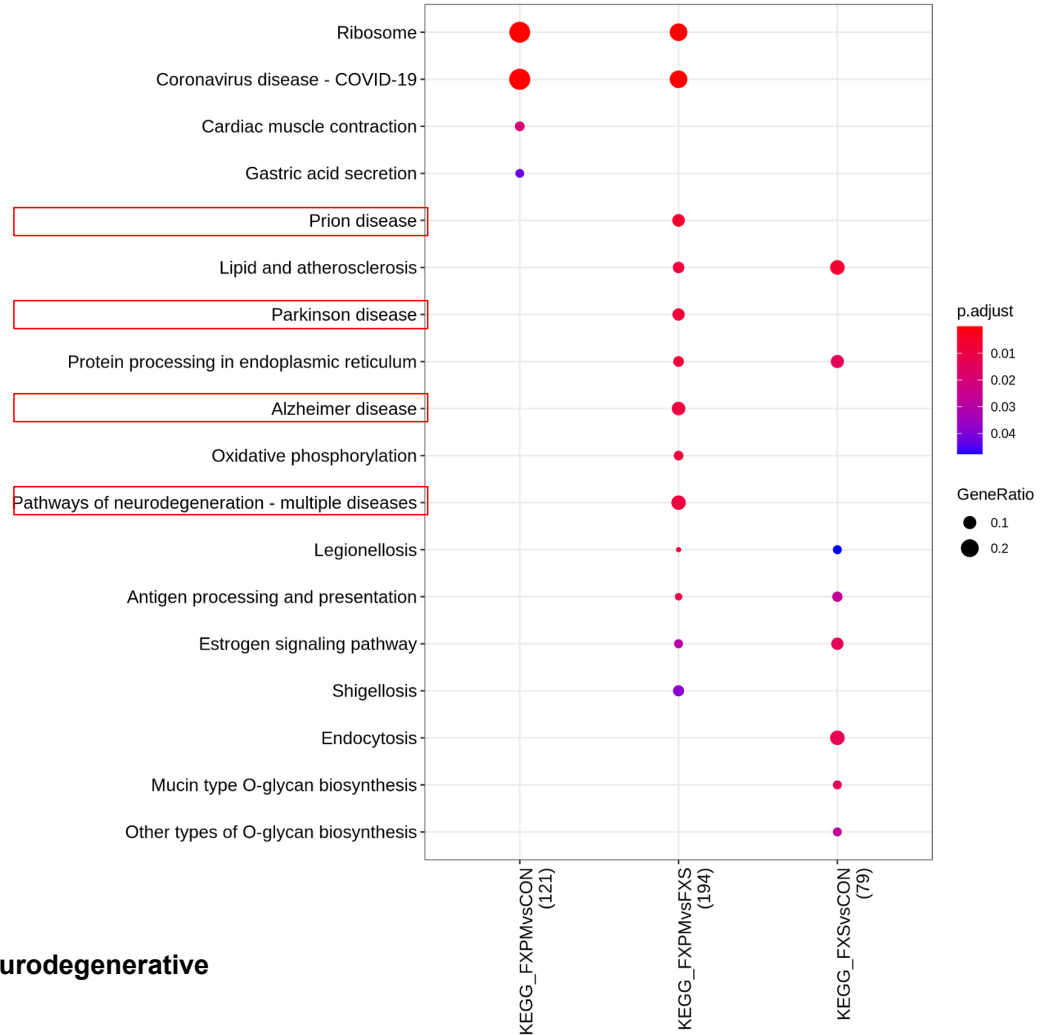

KEGG for cerebellar interneuron II demonstrate enrichment of neurodegenerative and prion terms (PM and FXS comparisons).

# Microglia

## GO\_BP

## Top 20

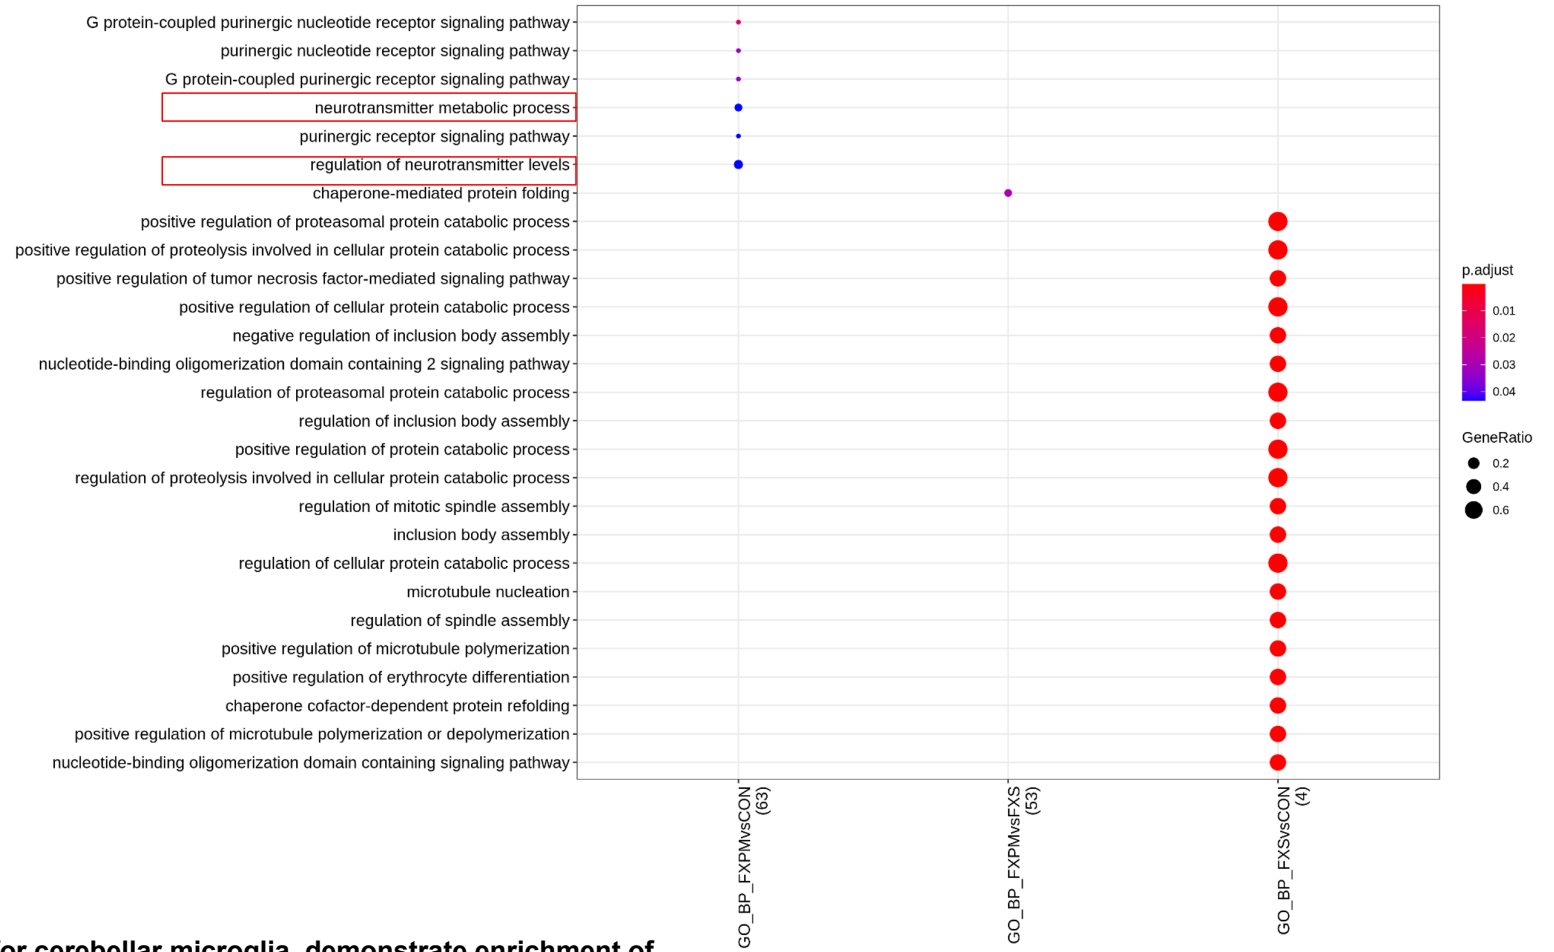

GO Biological Processes for cerebellar microglia demonstrate enrichment of neurotransmitter metabolism (PM comparisons) and protein catabolism (FXS comparisons).

# Microglia

## KEGG

### Top 20

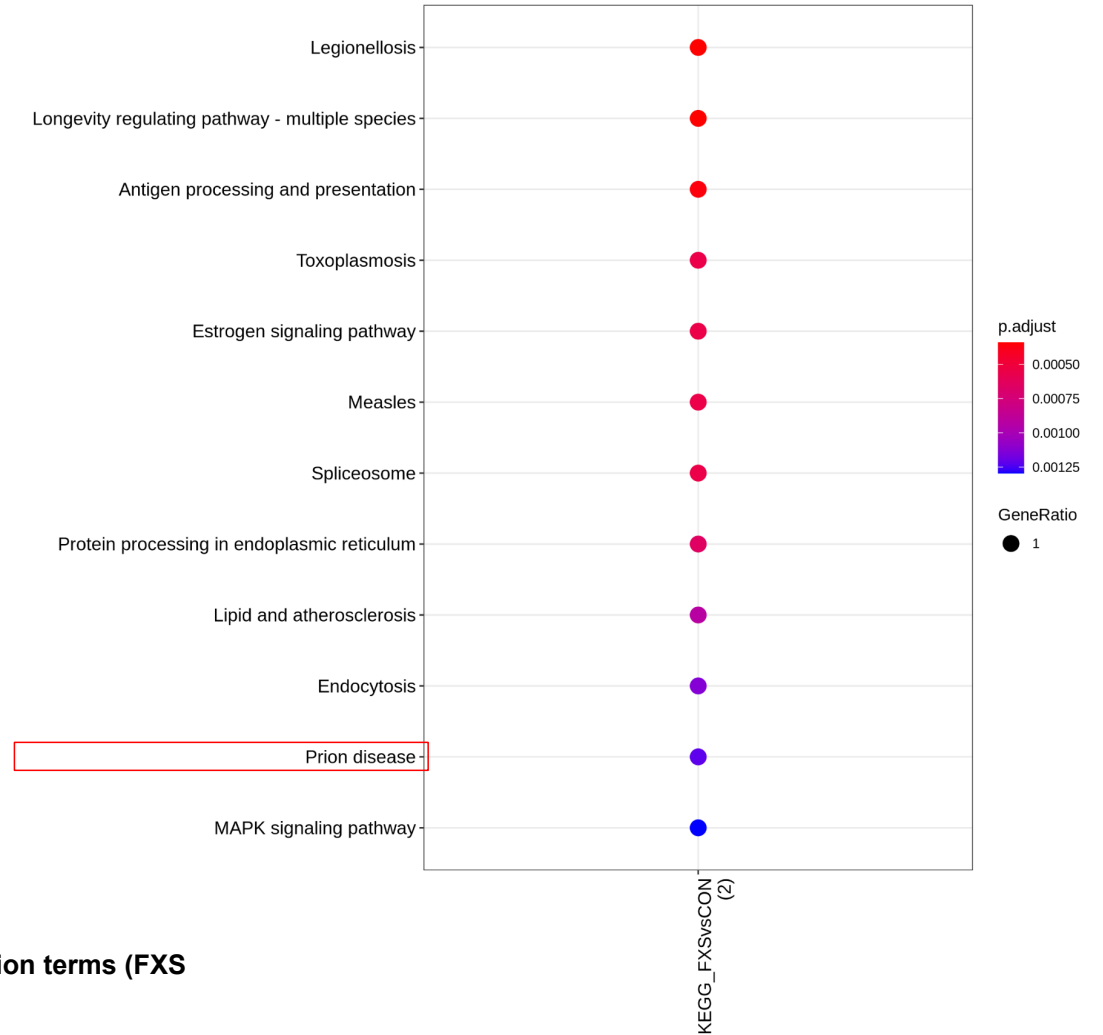

KEGG for cerebellar microglia demonstrate enrichment of prion terms (FXS comparisons).

# Oligo

## GO\_BP

### Top 20

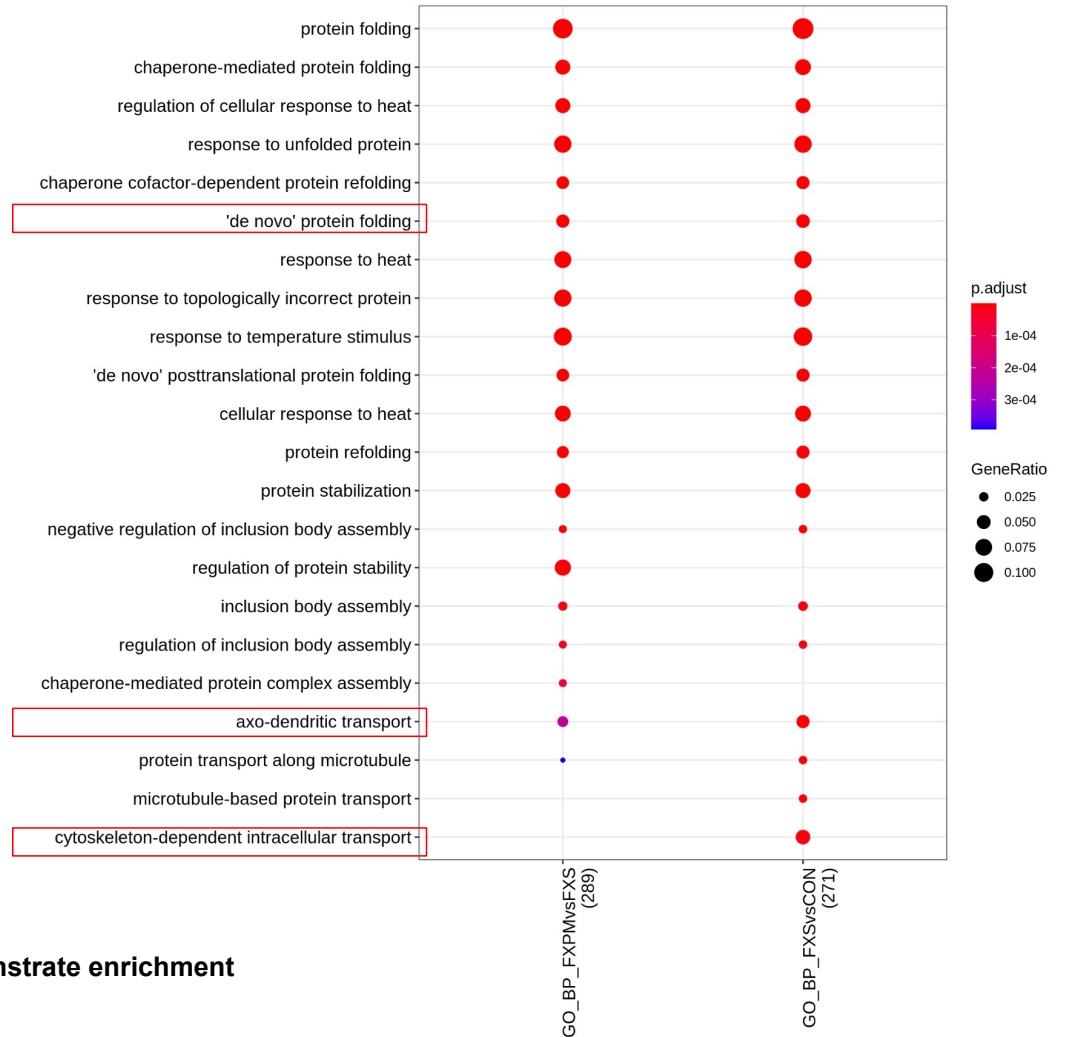

GO Biological Processes for cerebellar oligodendrocytes demonstrate enrichment of protein folding terms (PM and FXS comparisons).

# Oligo

# KEGG

# Top 20

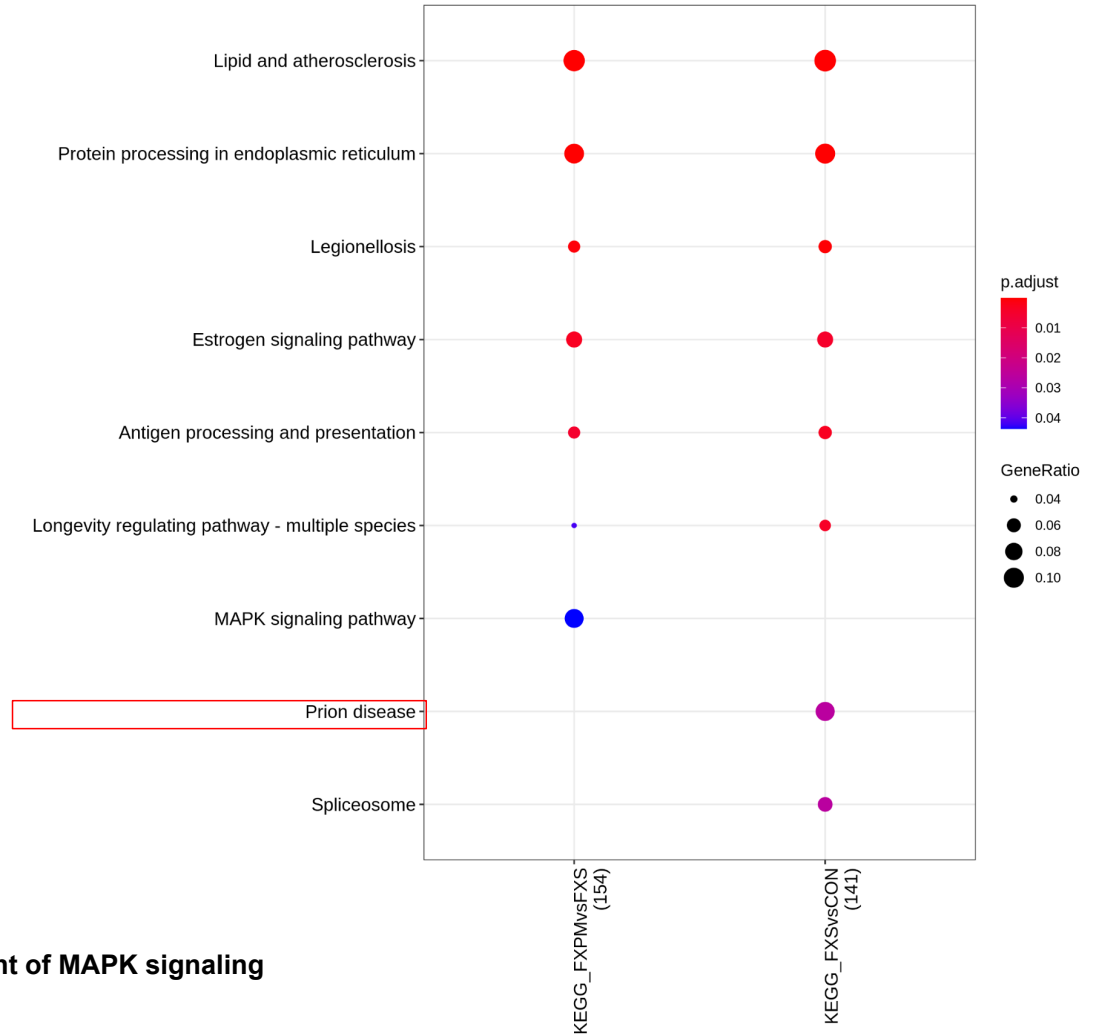

KEGG for cerebellar oligodendrocytes demonstrate enrichment of MAPK signaling and prion terms (PM and FXS comparisons).

# OPC

# GO\_BP

# Top 20

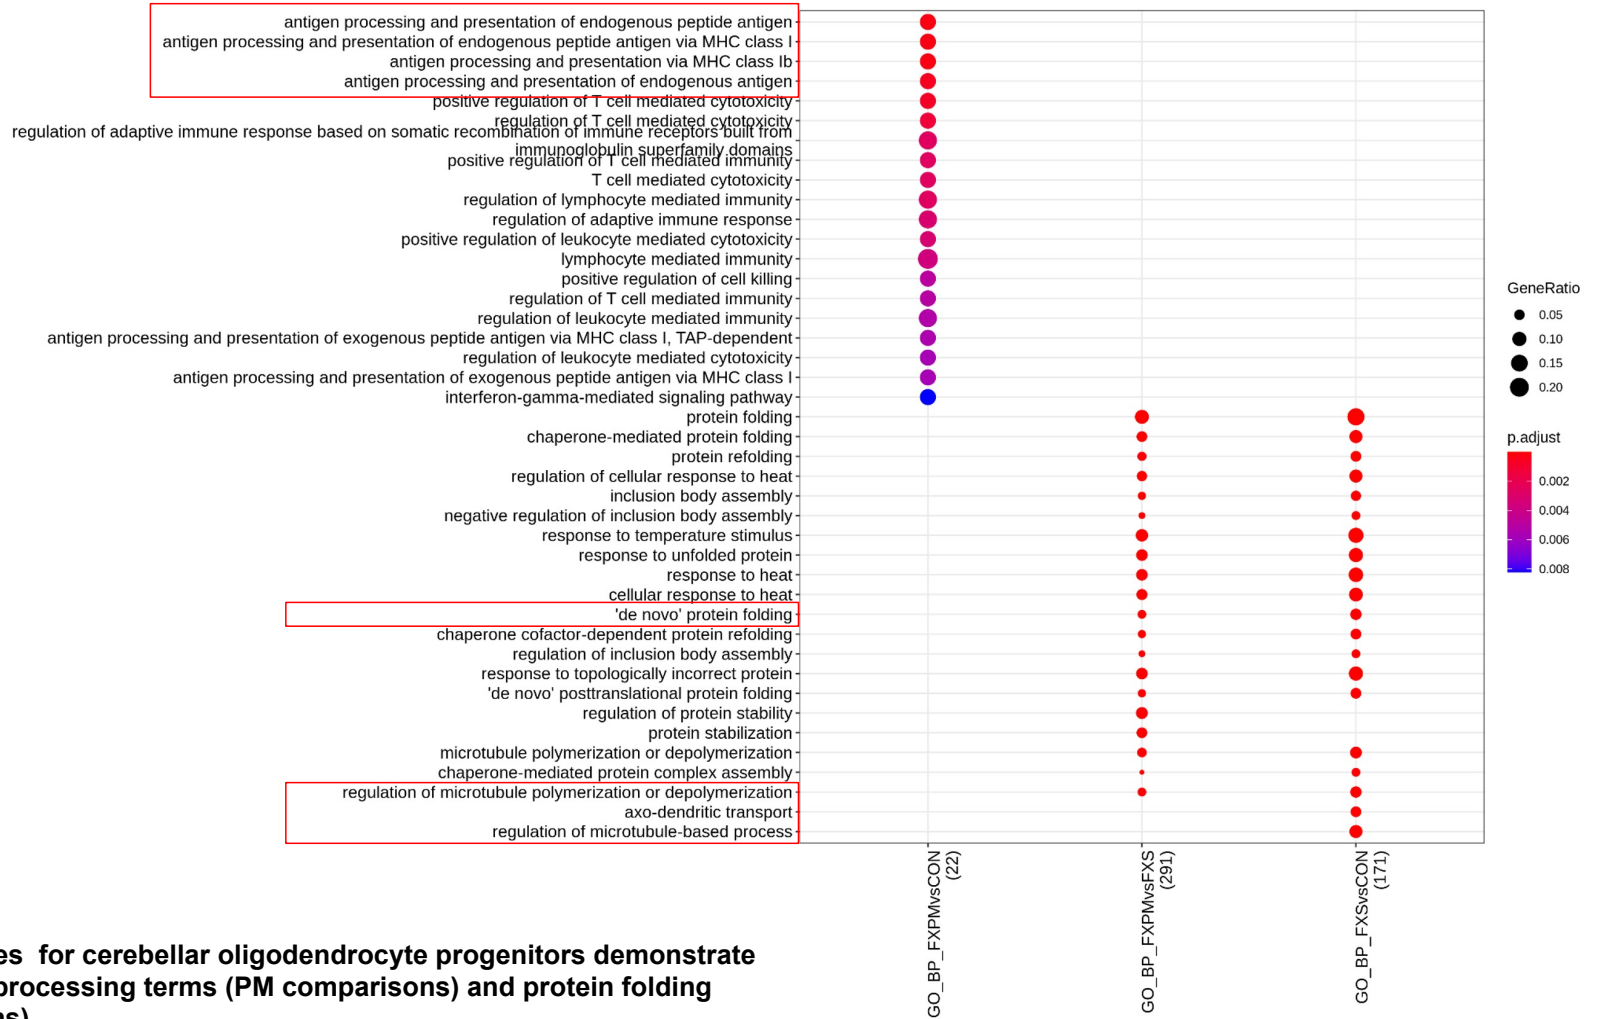

GO Biological Processes for cerebellar oligodendrocyte progenitors demonstrate enrichment of antigen processing terms (PM comparisons) and protein folding terms (FXS comparisons).

OPC

KEGG

Top 20

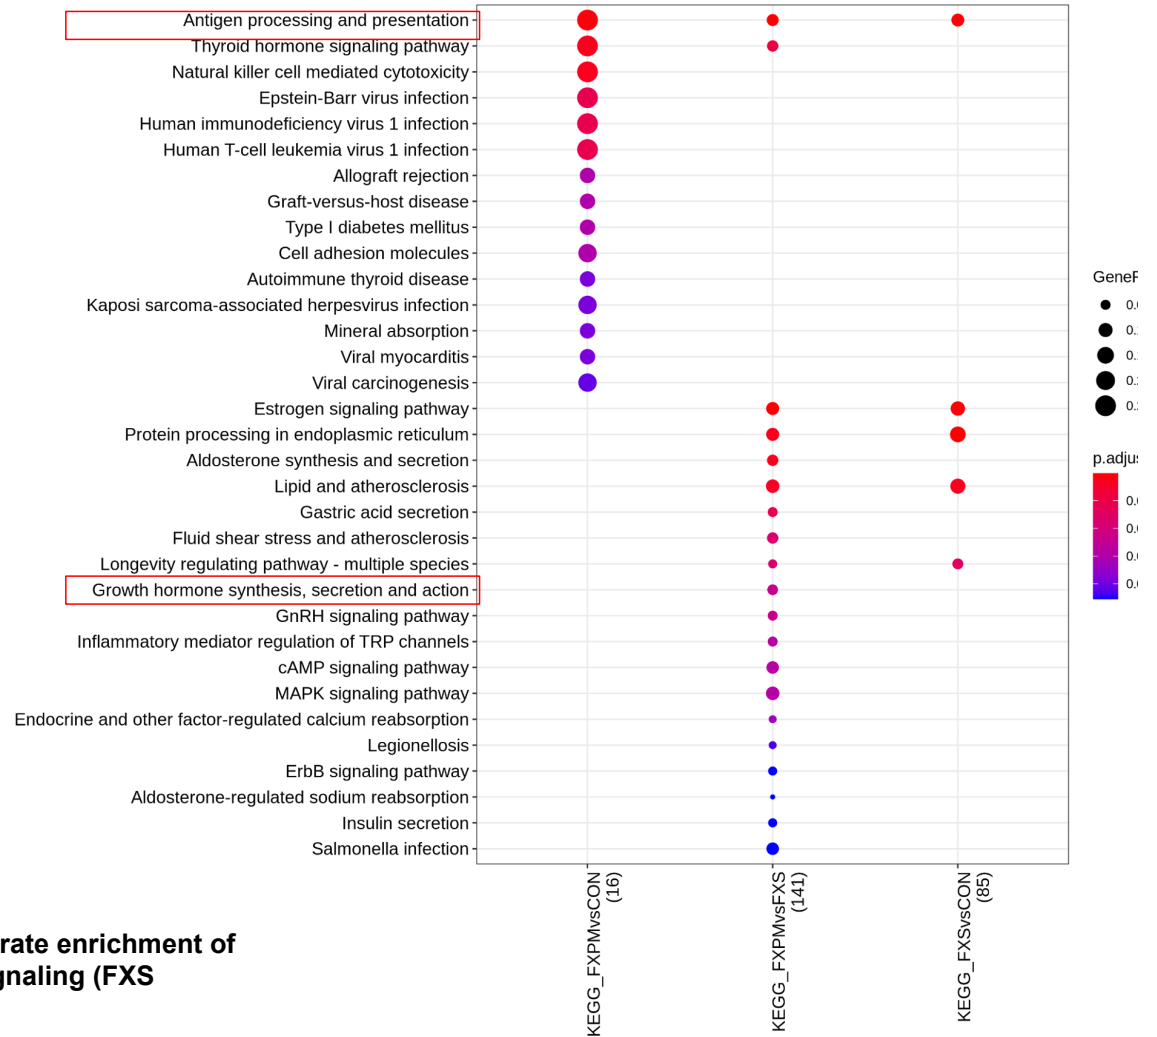

KEGG for cerebellar oligodendrocyte progenitors demonstrate enrichment of antigen processing terms (PM comparisons) and MAPK signaling (FXS comparisons).

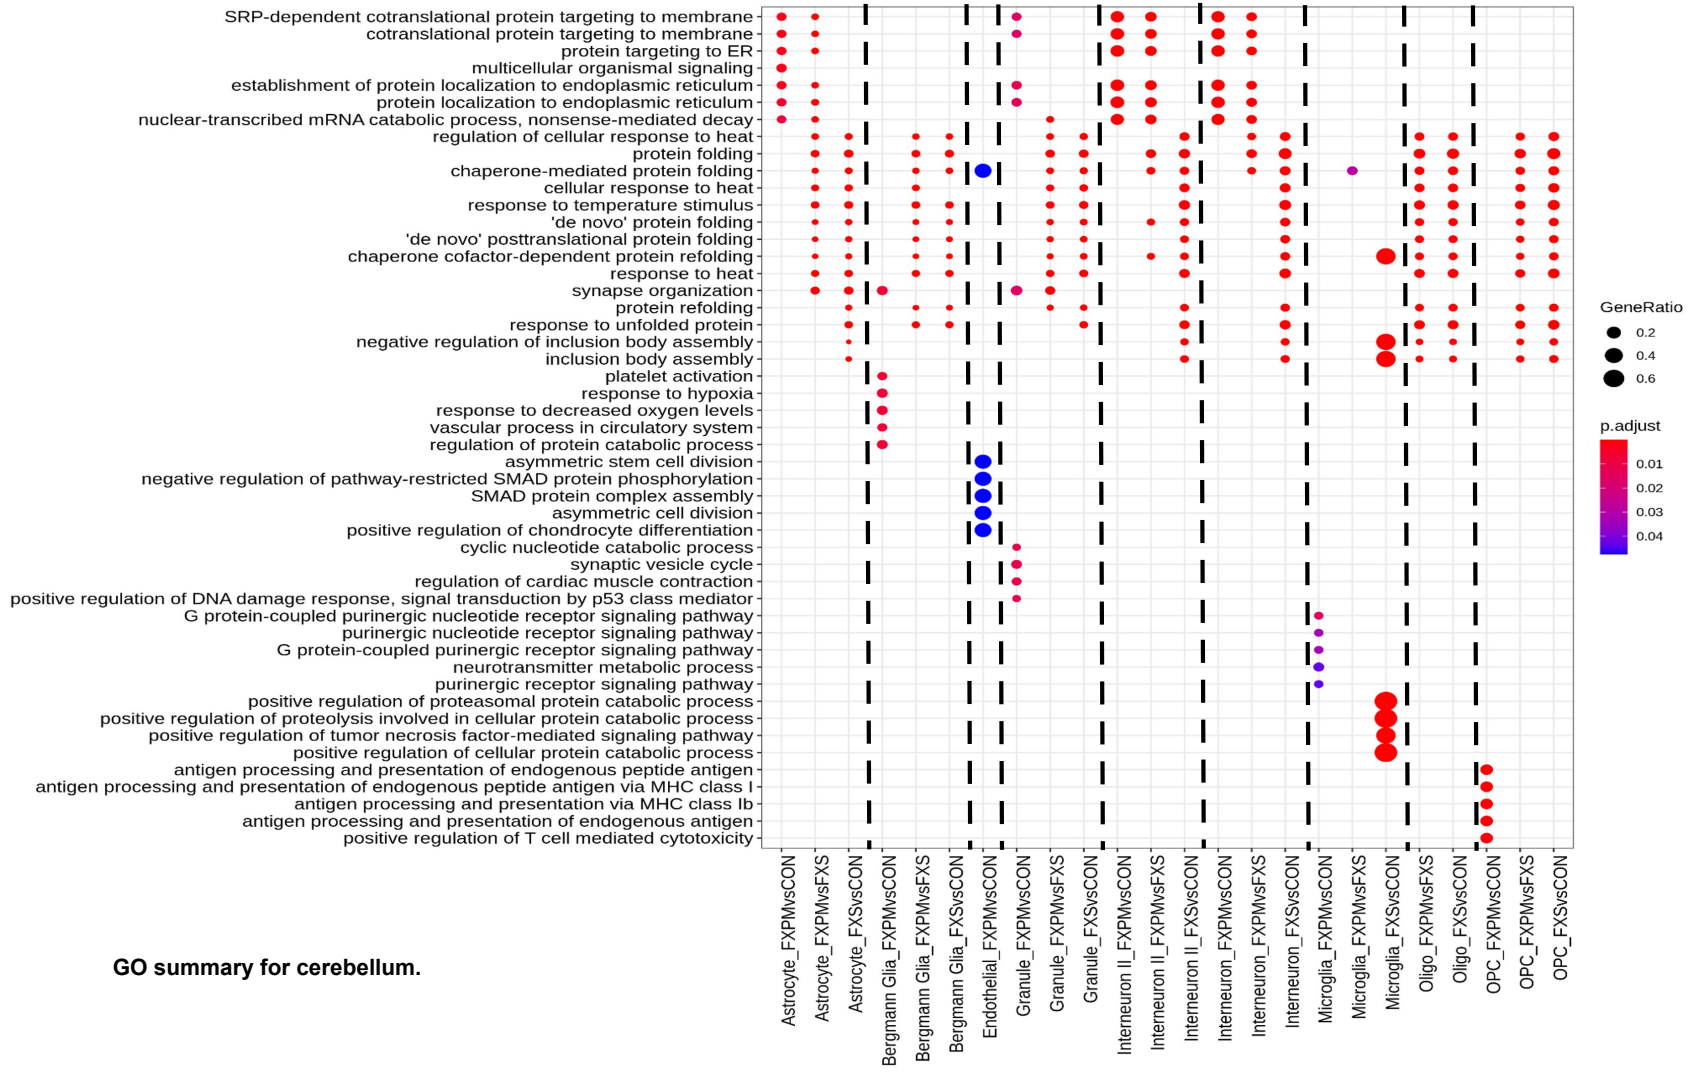



## Supplemental Information File 3

Cortical top 20 terms for enriched biological processes (BP) and Kyoto Encyclopedia of Genes and Genomes (KEGG) terms for each cellular population with each condition comparison, potential terms of particular interest highlighted with red box.

# Astro I

## GO\_BP

## Top 20

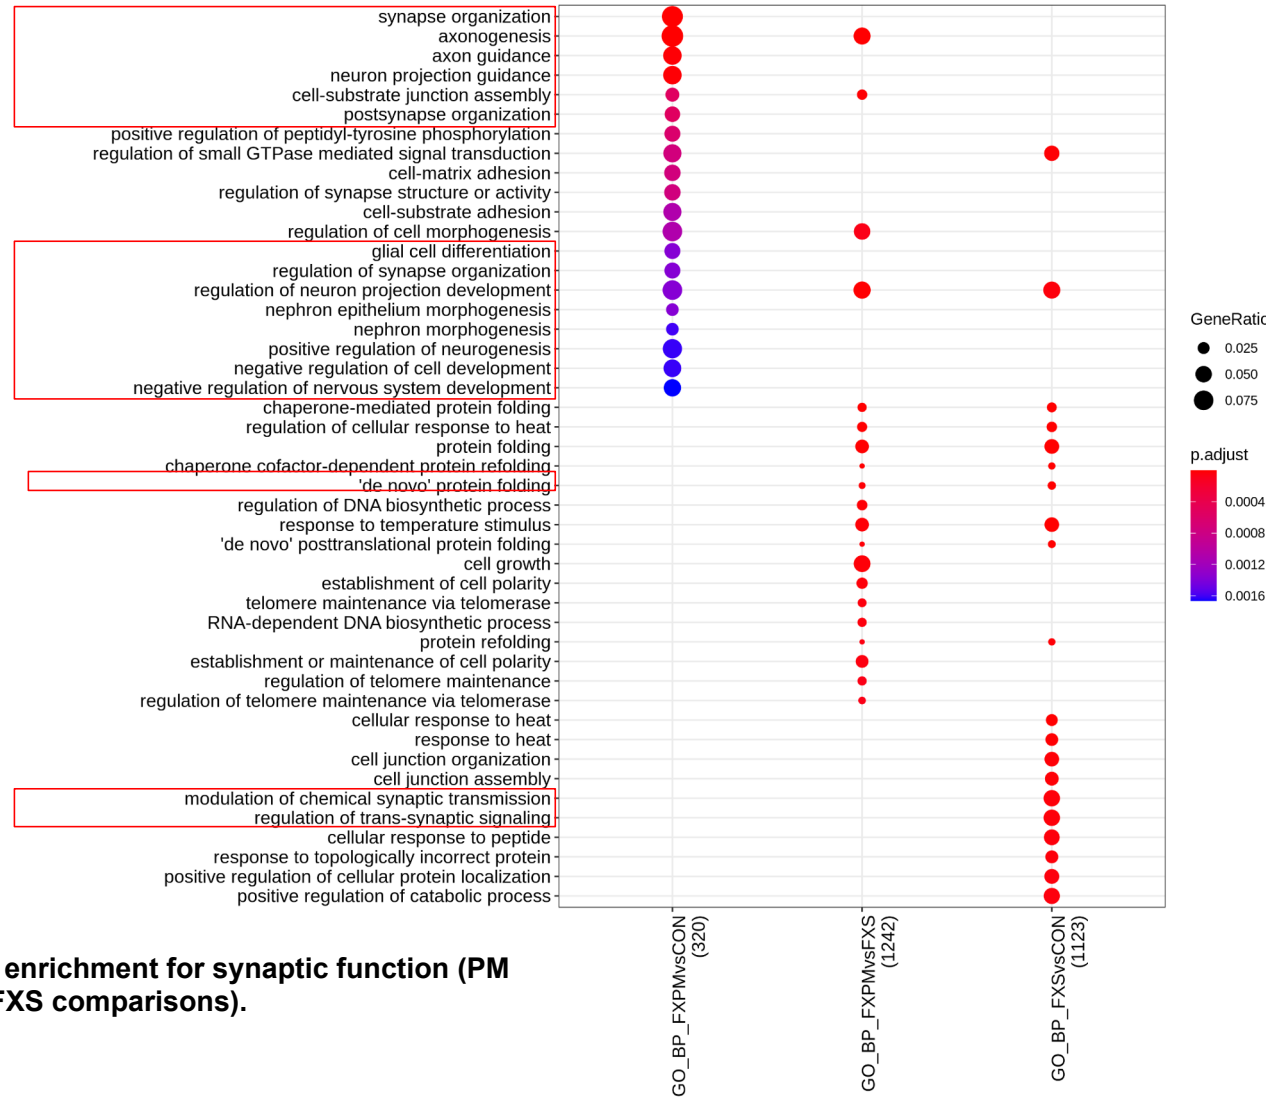

GO Biological Process for astrocyte I shows enrichment for synaptic function (PM and FXS comparisons) and protein folding (FXS comparisons).

# Astro I

## KEGG

### Top 20

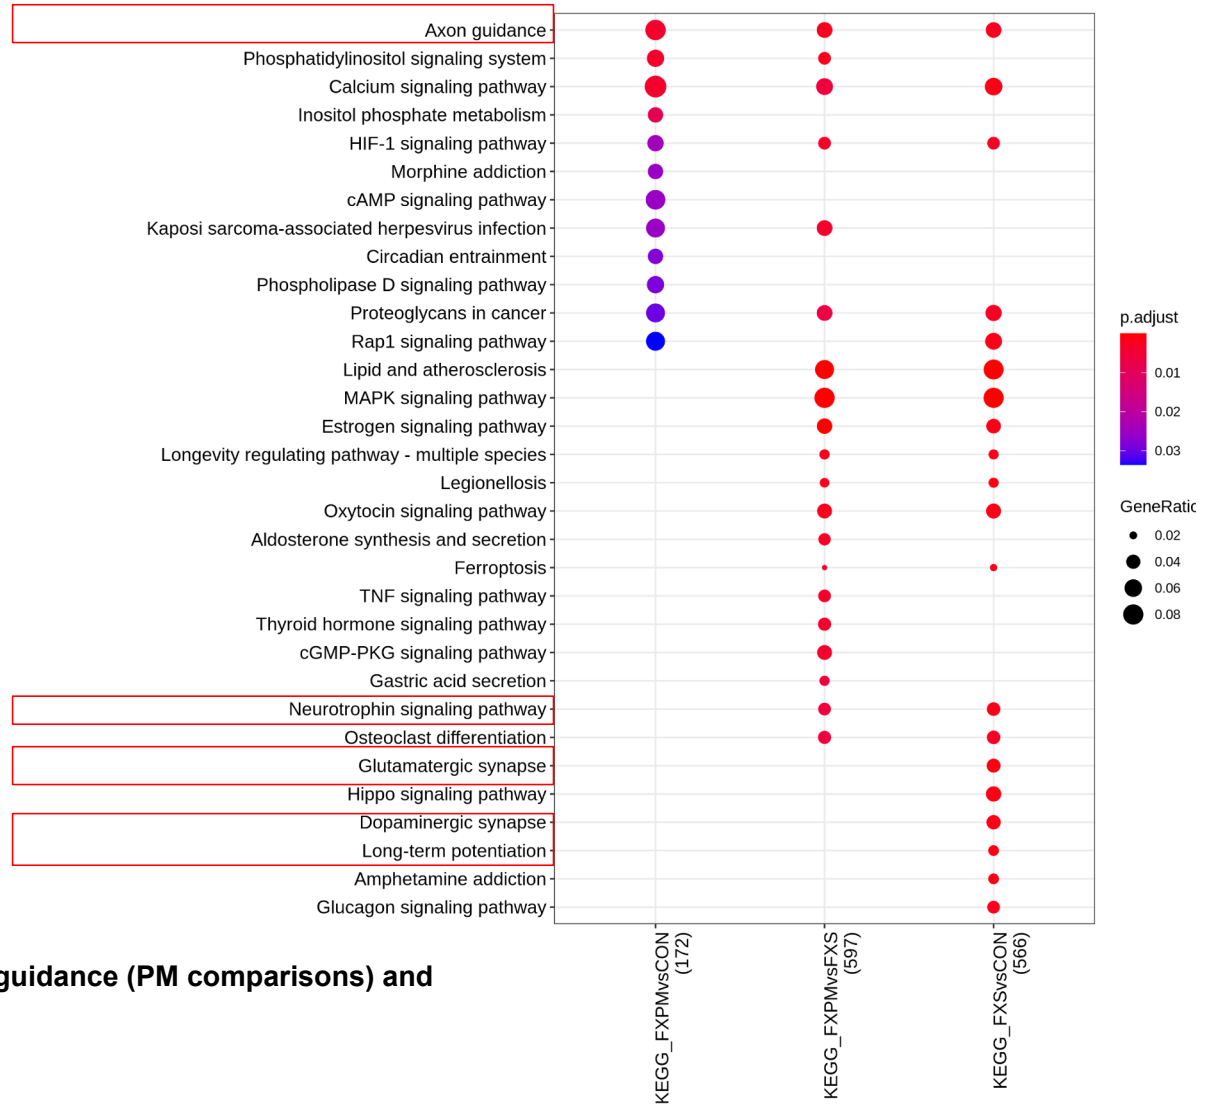

KEGG for astrocyte I shows enrichment for axon guidance (PM comparisons) and synaptic neurotransmission (FXS comparisons).

# Astro II

## GO\_BP

## Top 20

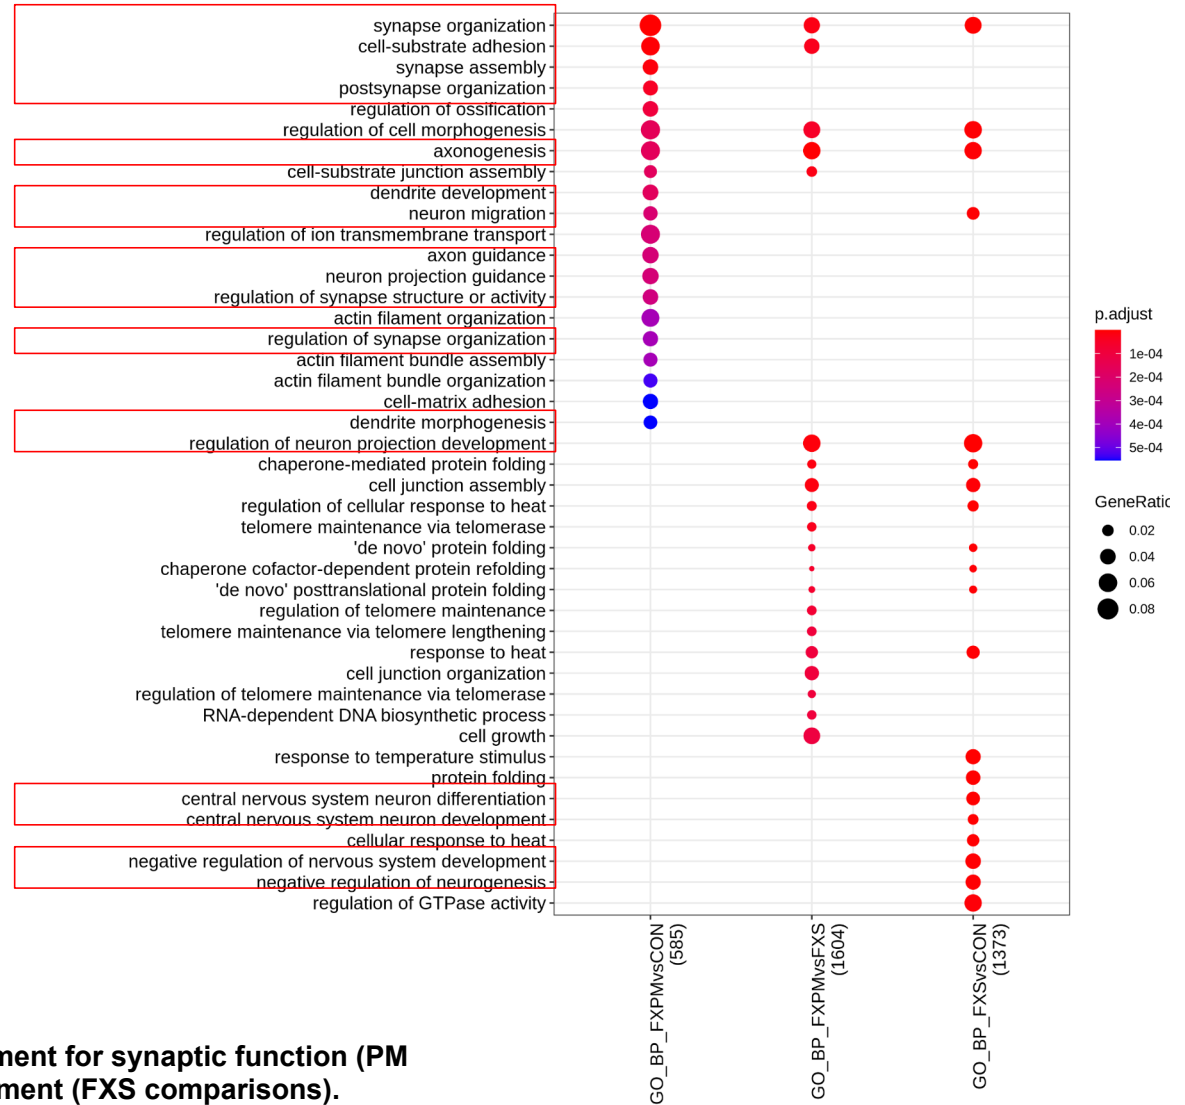

GO Biological Process for astrocyte II shows enrichment for synaptic function (PM and FXS comparisons) and nervous system development (FXS comparisons).

# Astro II

## KEGG

### Top 20

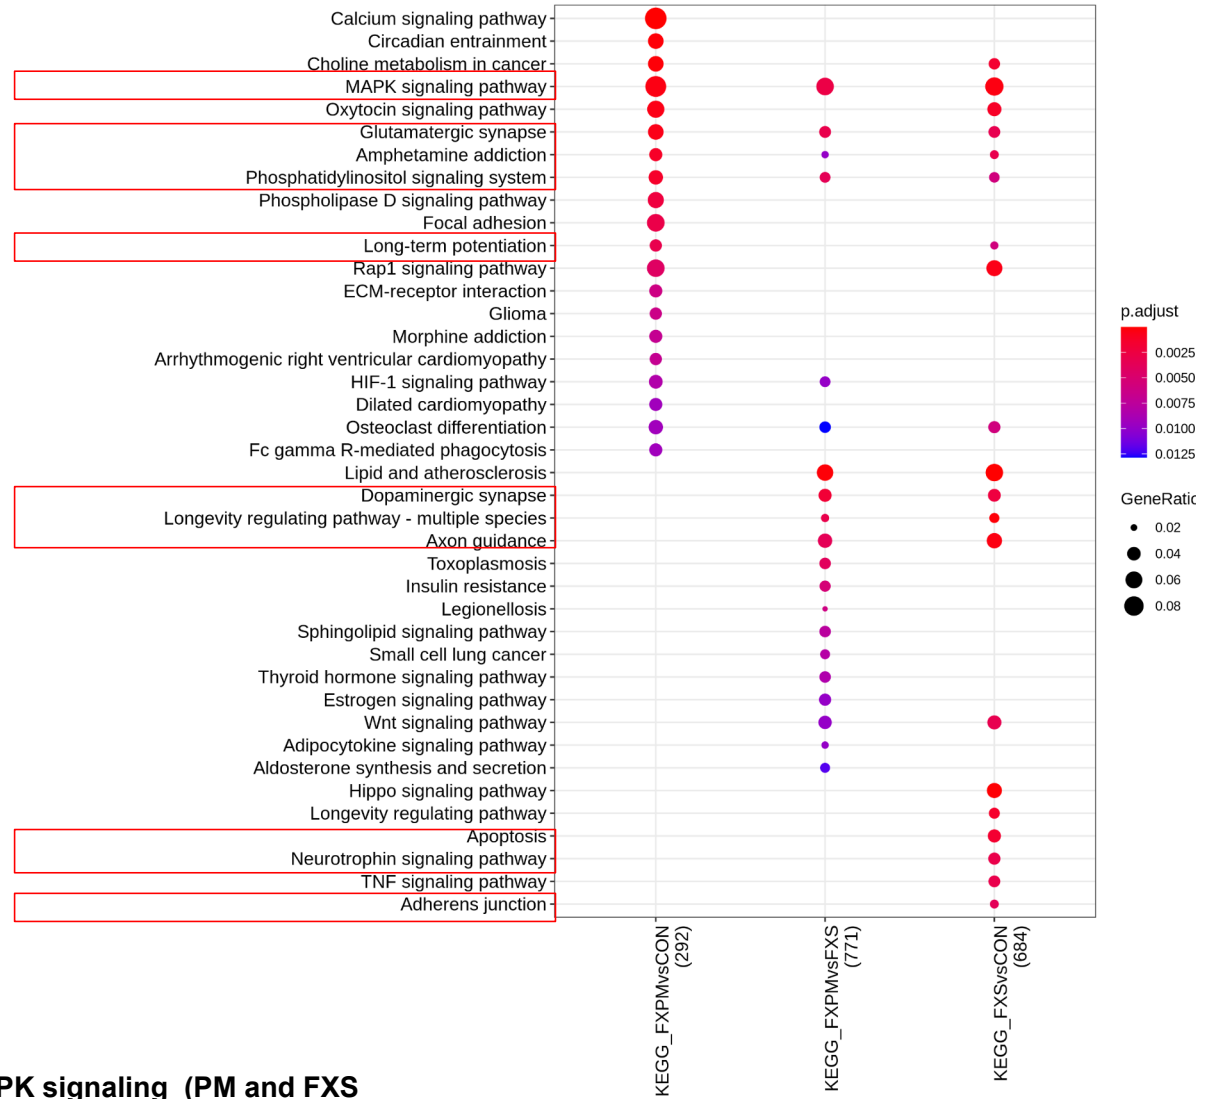

KEGG for astrocyte II shows enrichment for MAPK signaling (PM and FXS comparisons) and apoptosis (FXS comparisons).

# Endo

## GO\_BP

### Top 20

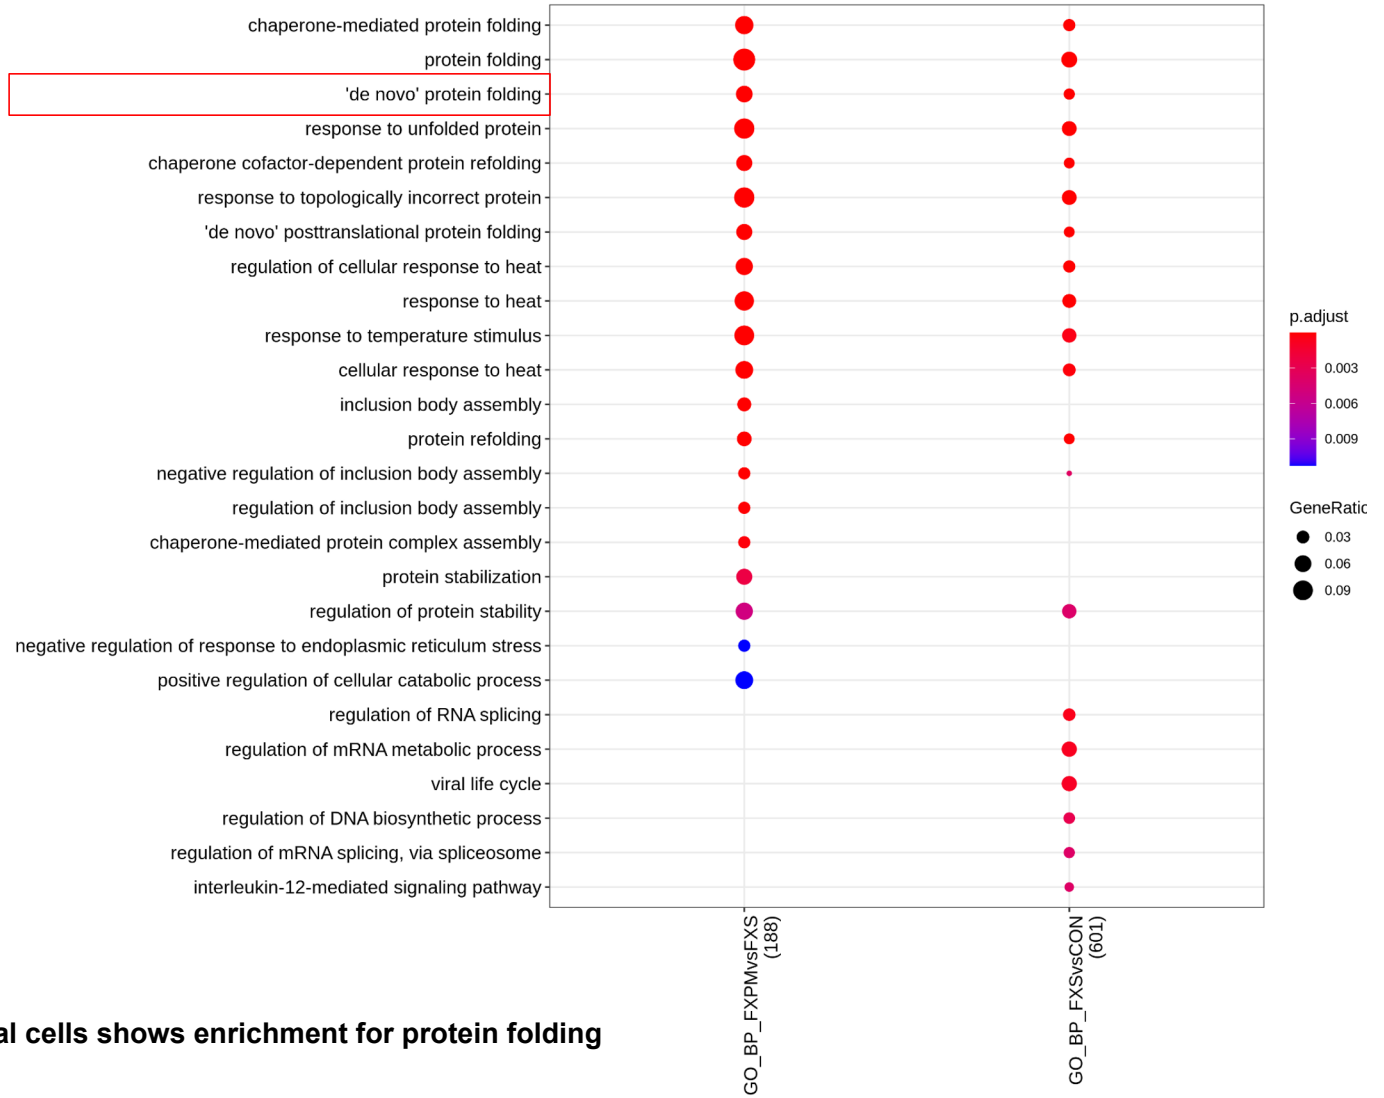

**GO Biological Process for endothelial cells shows enrichment for protein folding (PM and FXS comparisons).**

Endo

KEGG

Top 20

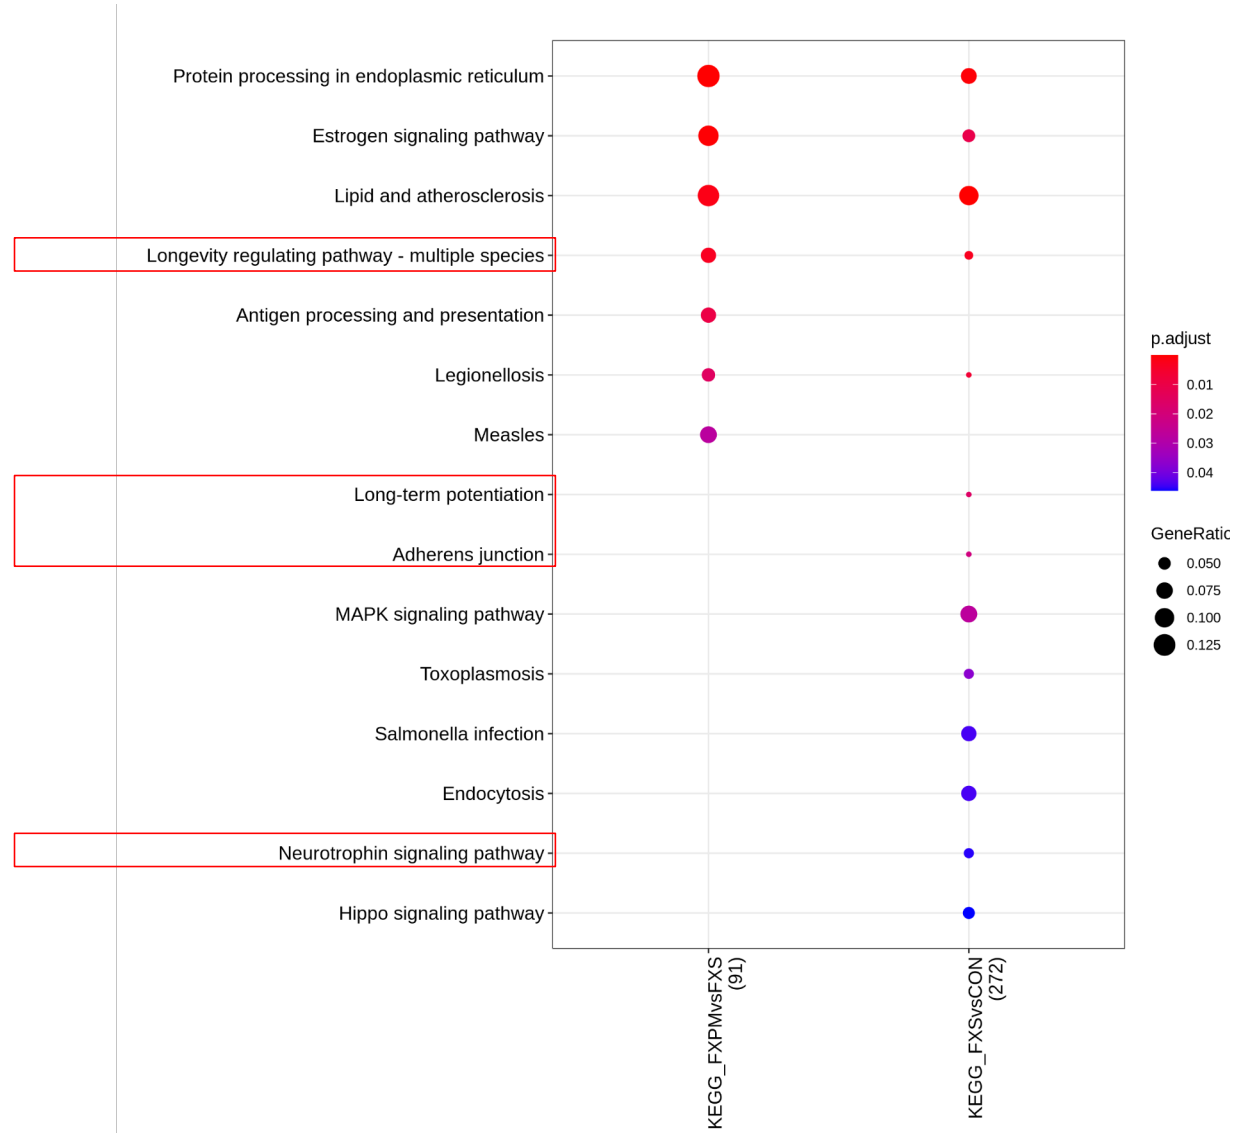

KEGG for endothelial cells shows enrichment for longevity (PM and FXS comparisons).

# Inh-PVALB I

## GO\_BP

## Top 20

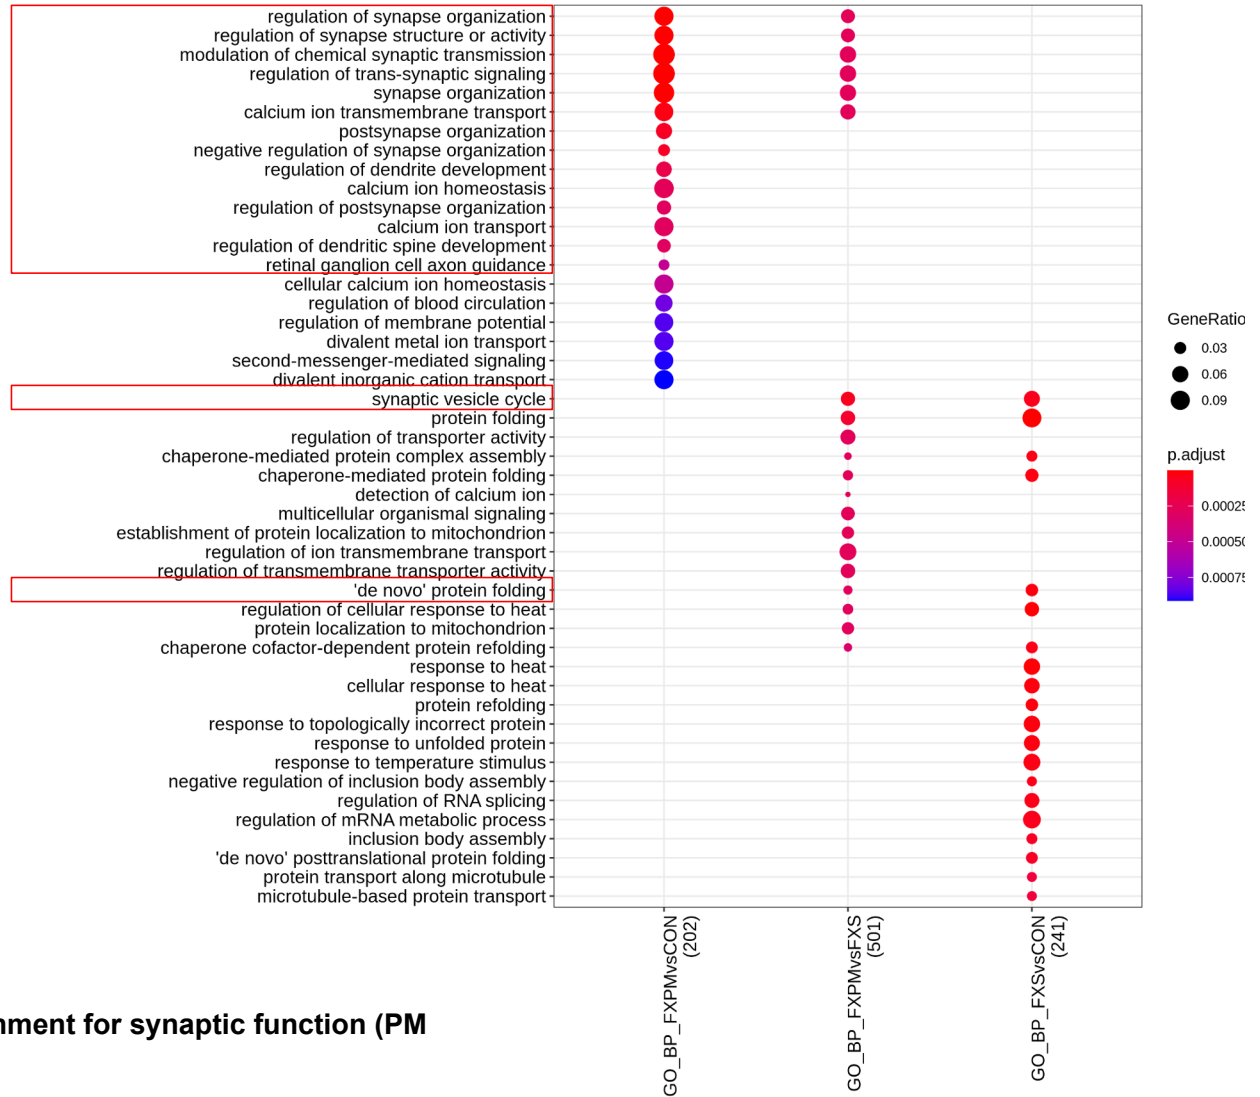

GO Biological Process for PVALB I shows enrichment for synaptic function (PM comparisons).



# Inh-PVALB I

## KEGG

## Top 20

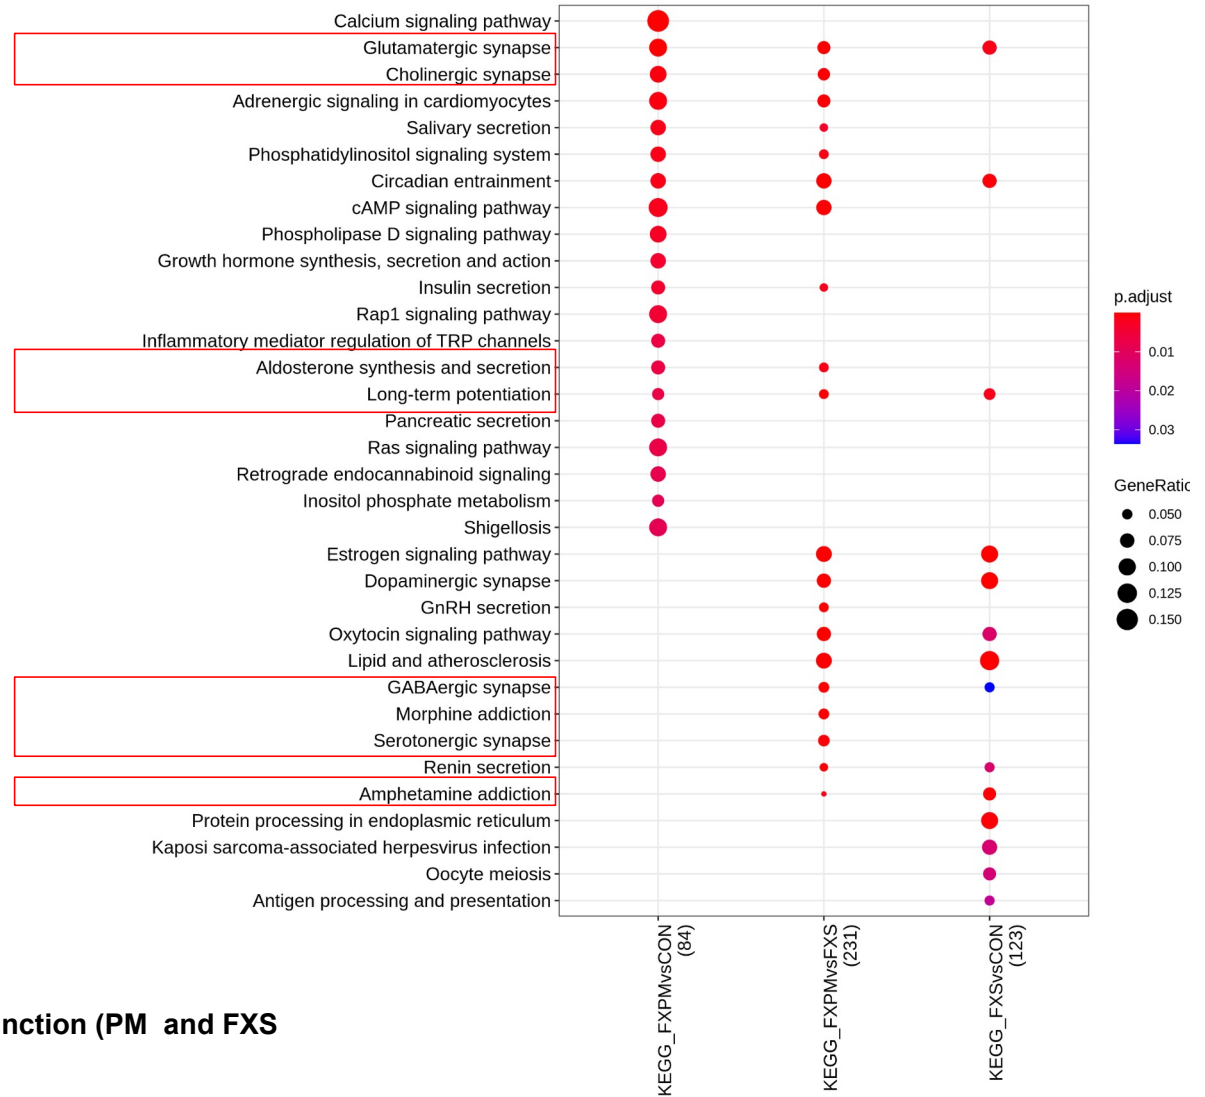

KEGG for PVALB I shows enrichment for synaptic function (PM and FXS comparisons).

# Inh-PVALB II

## GO\_BP

## Top 20

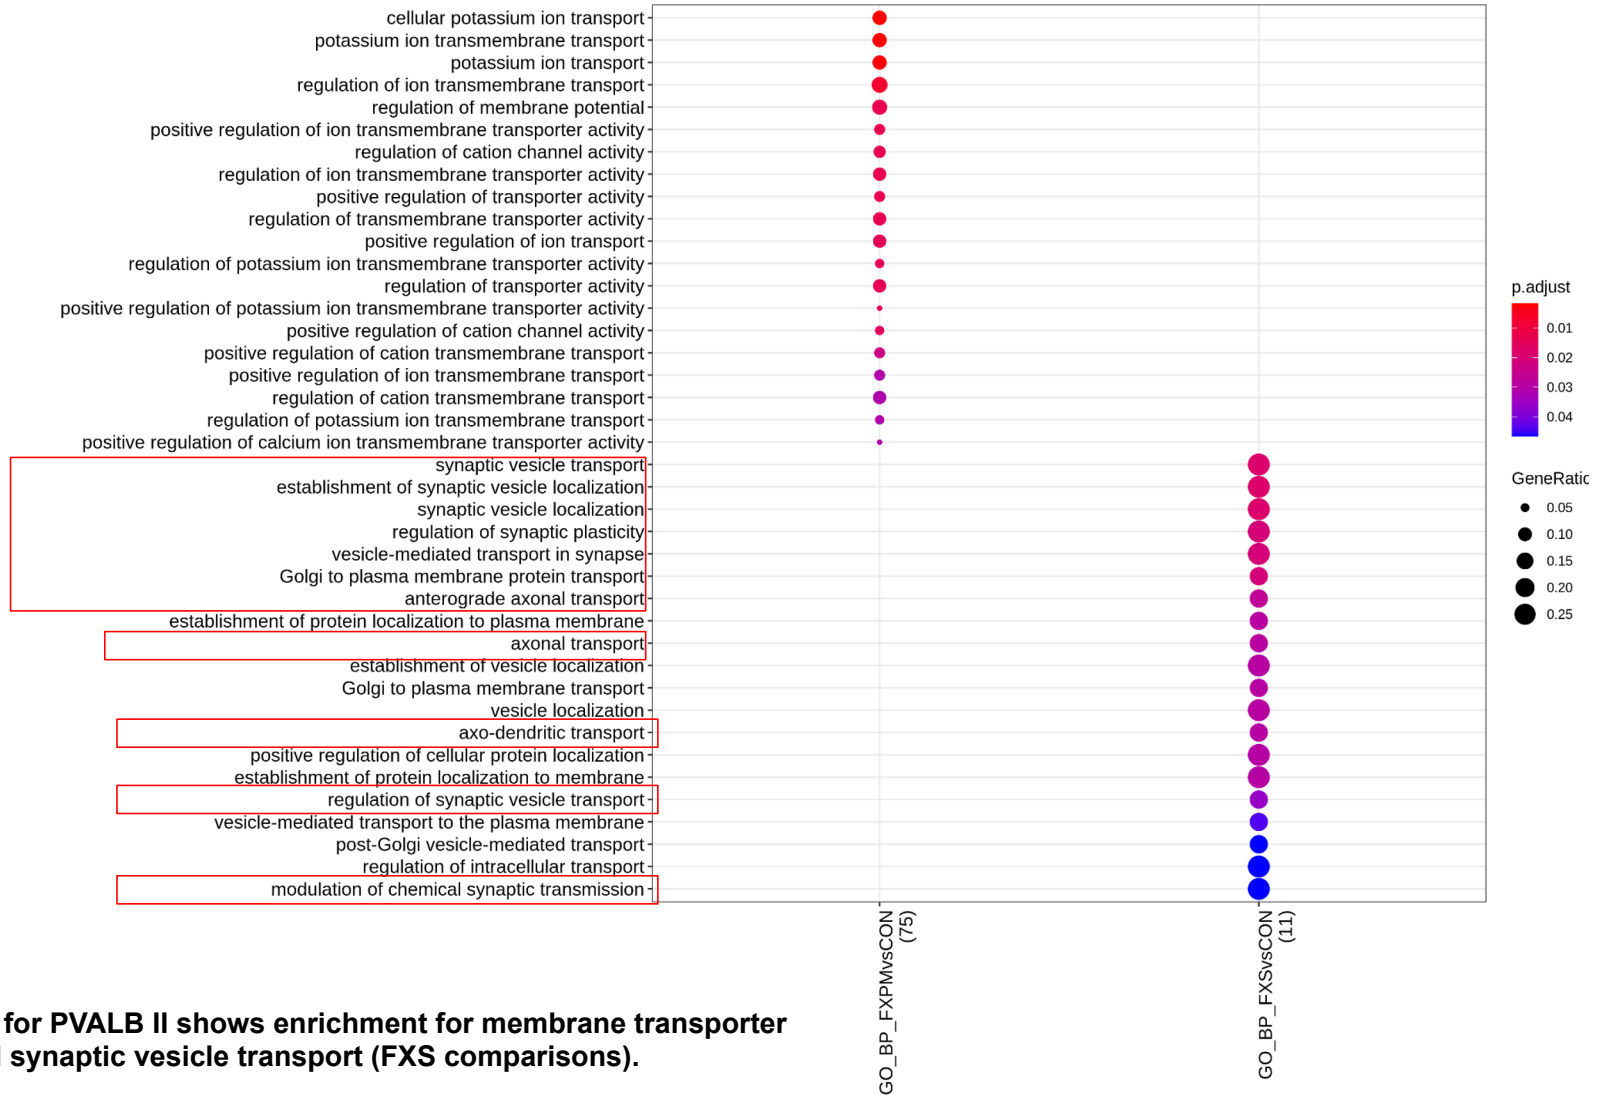

# Inh-PVALB II

## KEGG

### Top 20

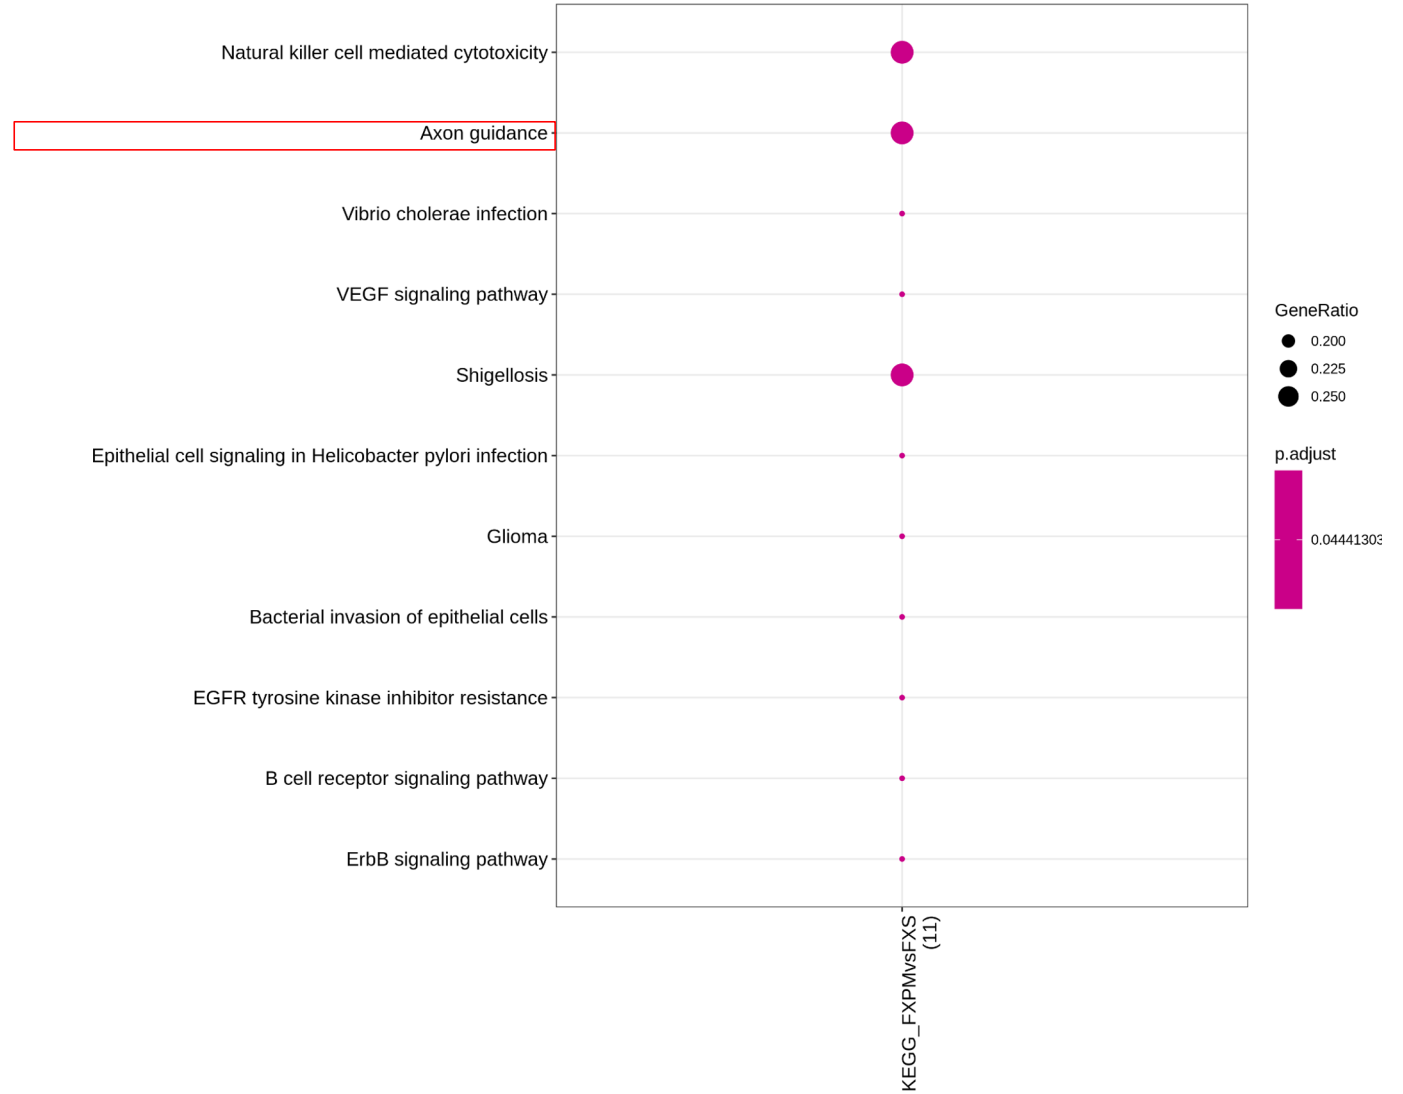

# Inh-SST

## GO\_BP

## Top 20

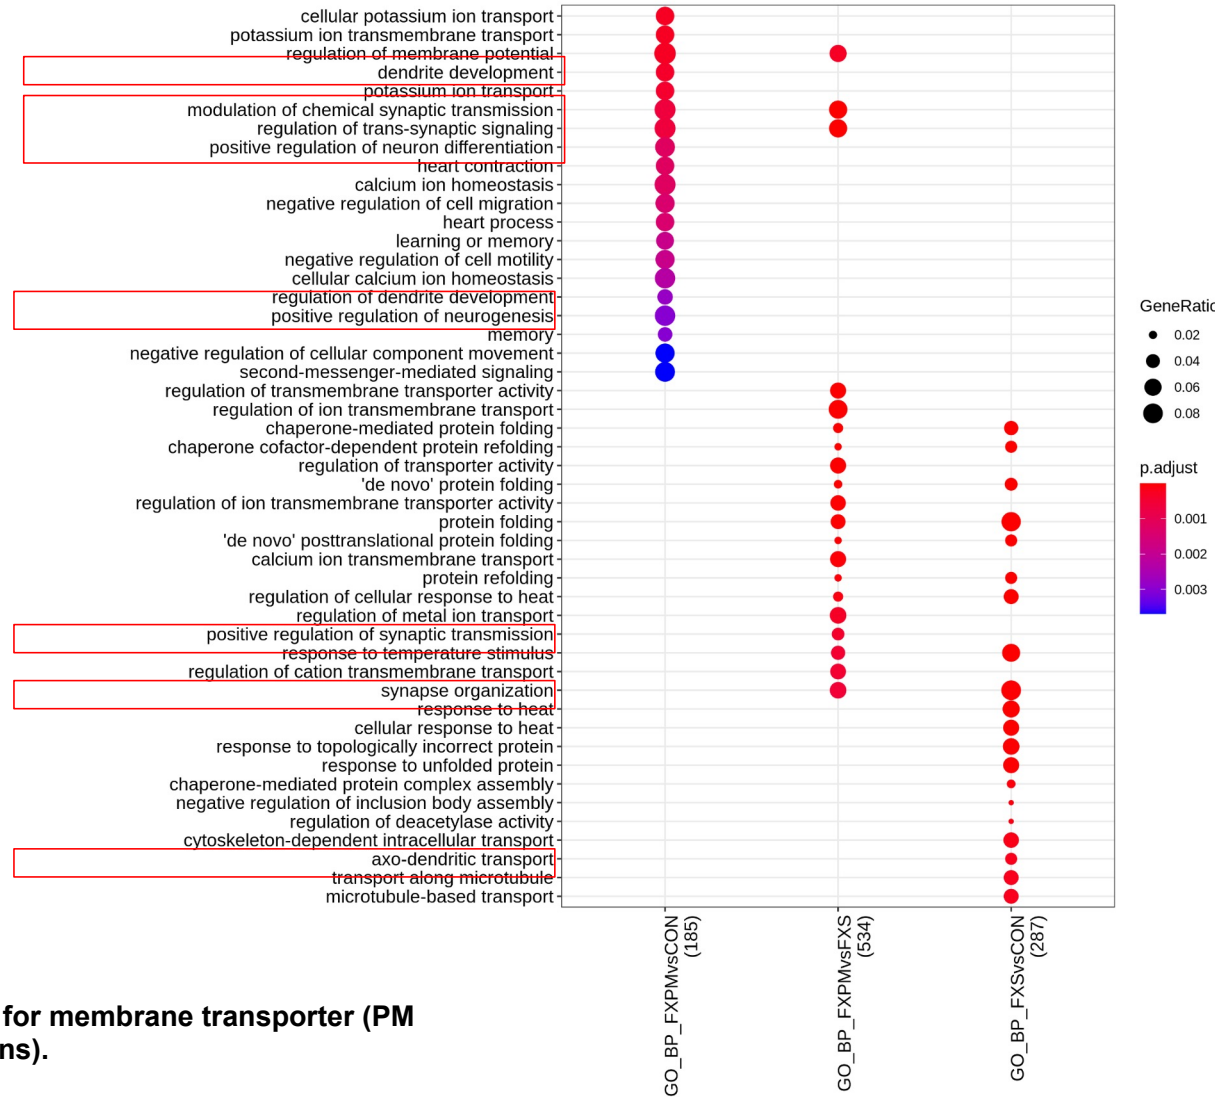

GO Biological Process for SST shows enrichment for membrane transporter (PM comparisons) and protein folding (FXS comparisons).

# Inh-SST

# KEGG

# Top 20

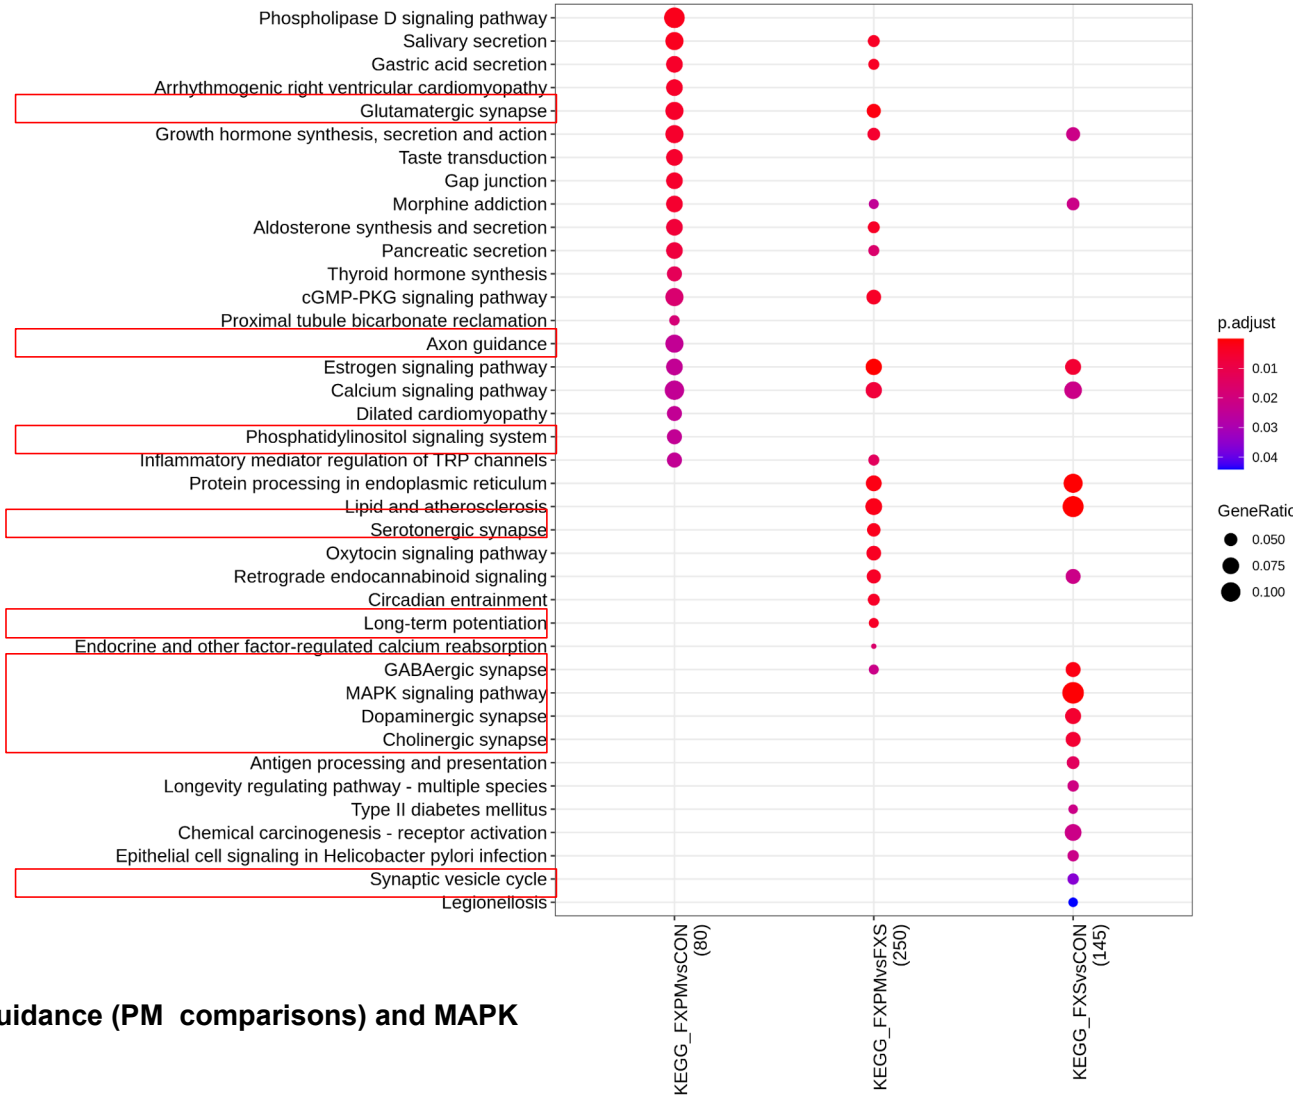

KEGG for SST shows enrichment for axon guidance (PM comparisons) and MAPK signaling (FXS comparisons).

# Inh-SV2C I

## GO\_BP

## Top 20

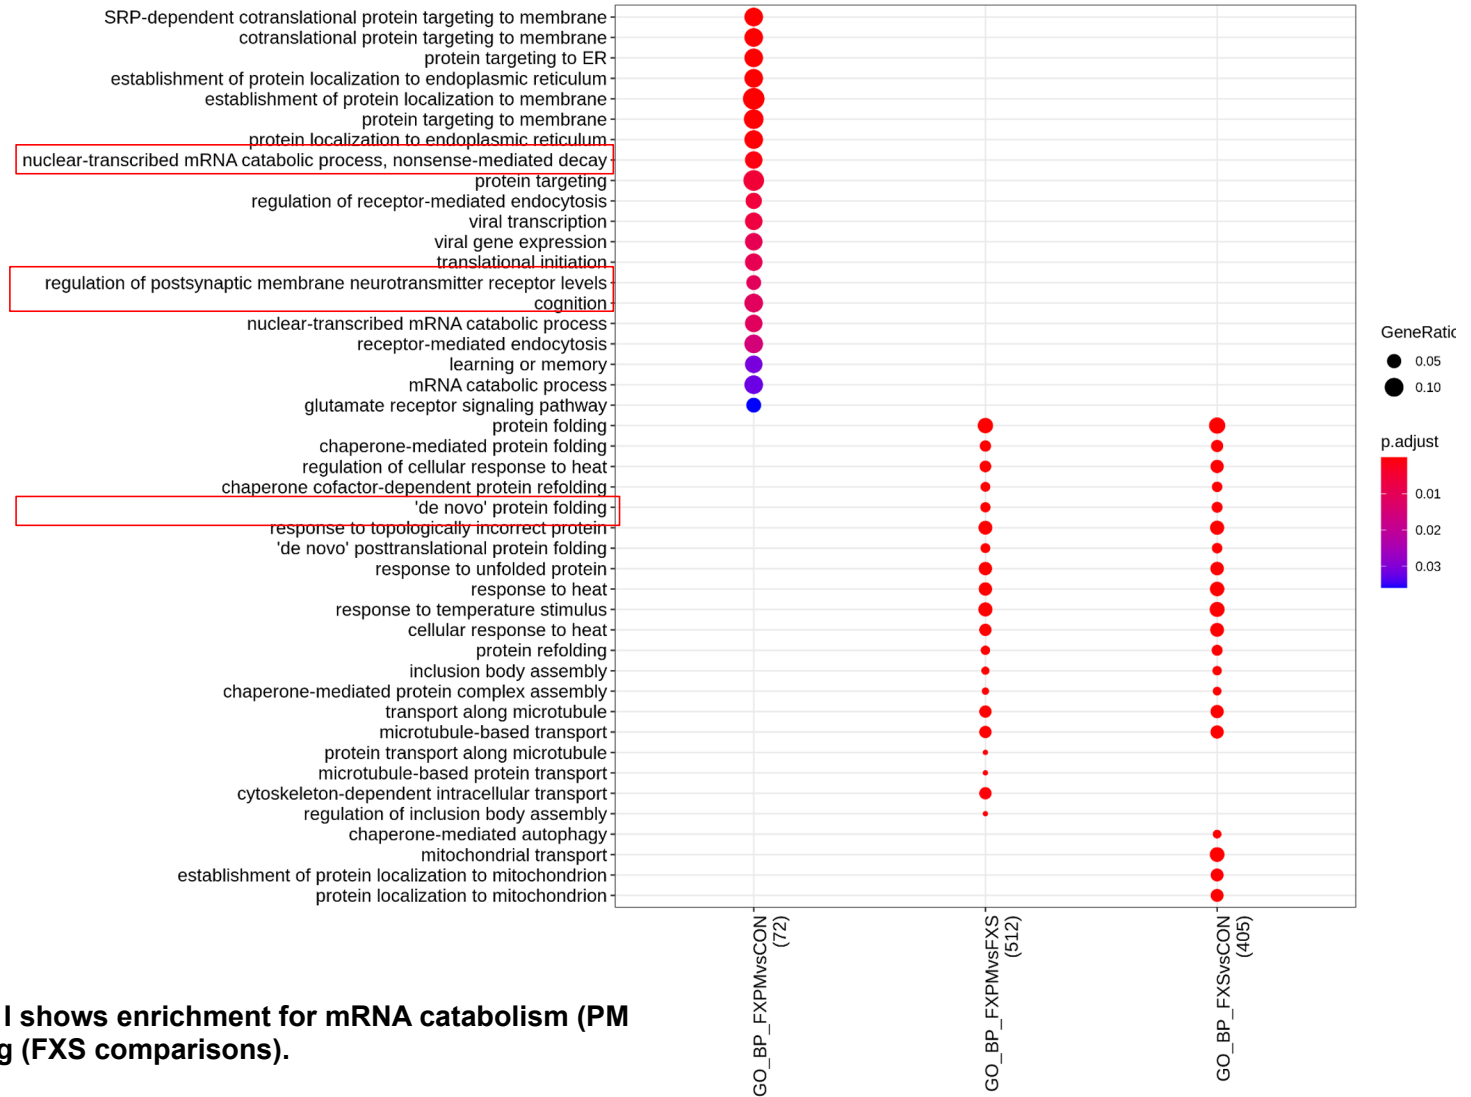

GO Biological Process for SV2C I shows enrichment for mRNA catabolism (PM comparisons) and protein folding (FXS comparisons).

# Inh-SV2C I

## KEGG

### Top 20

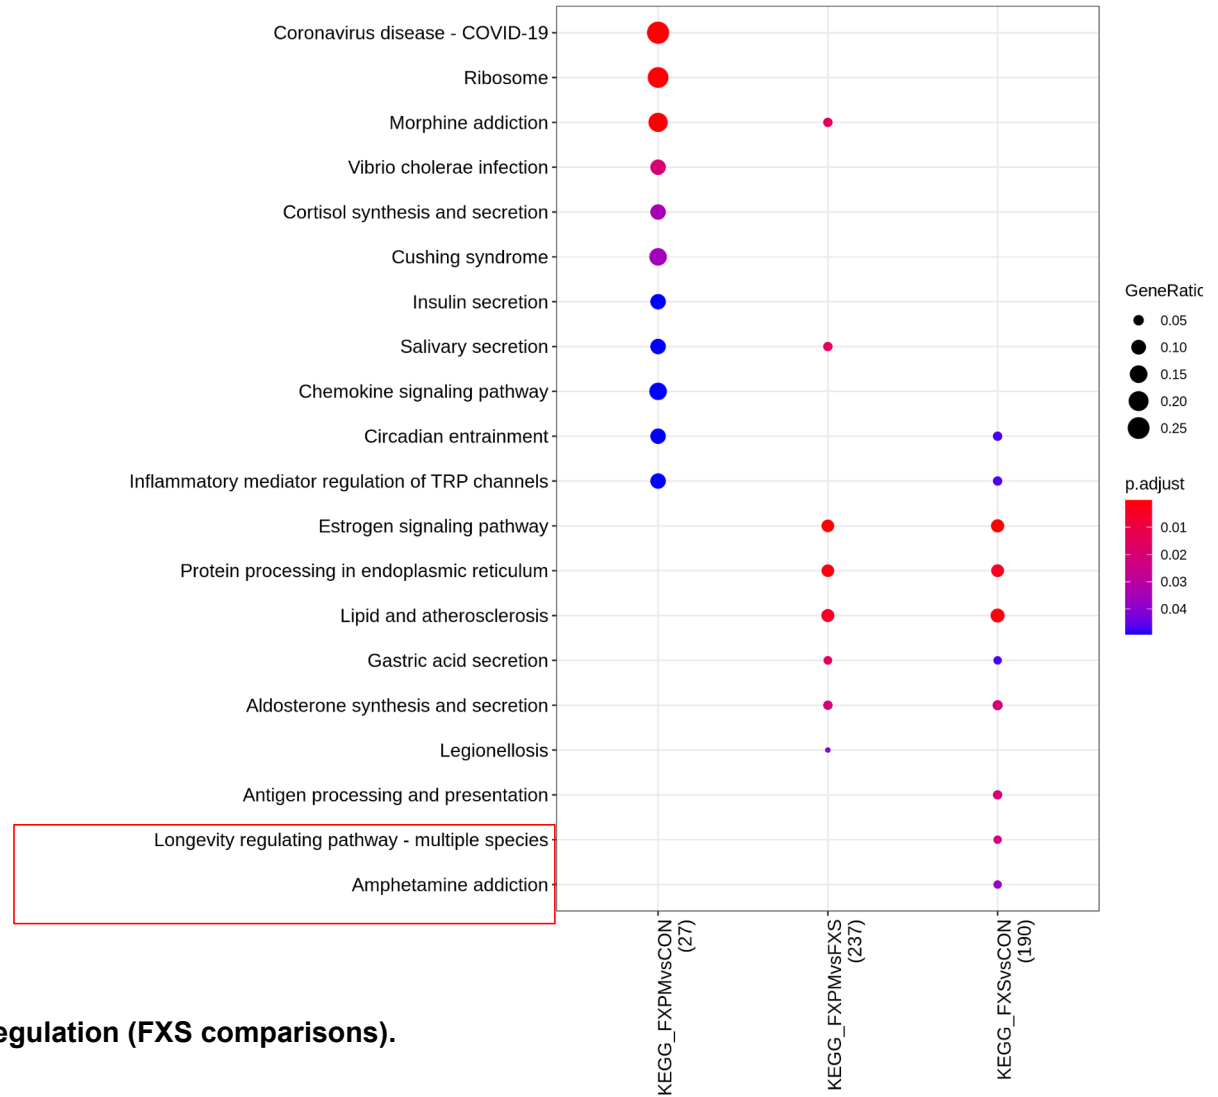

KEGG for SV2C I shows enrichment for longevity regulation (FXS comparisons).

# Inh-SV2C II

## GO\_BP

## Top 20

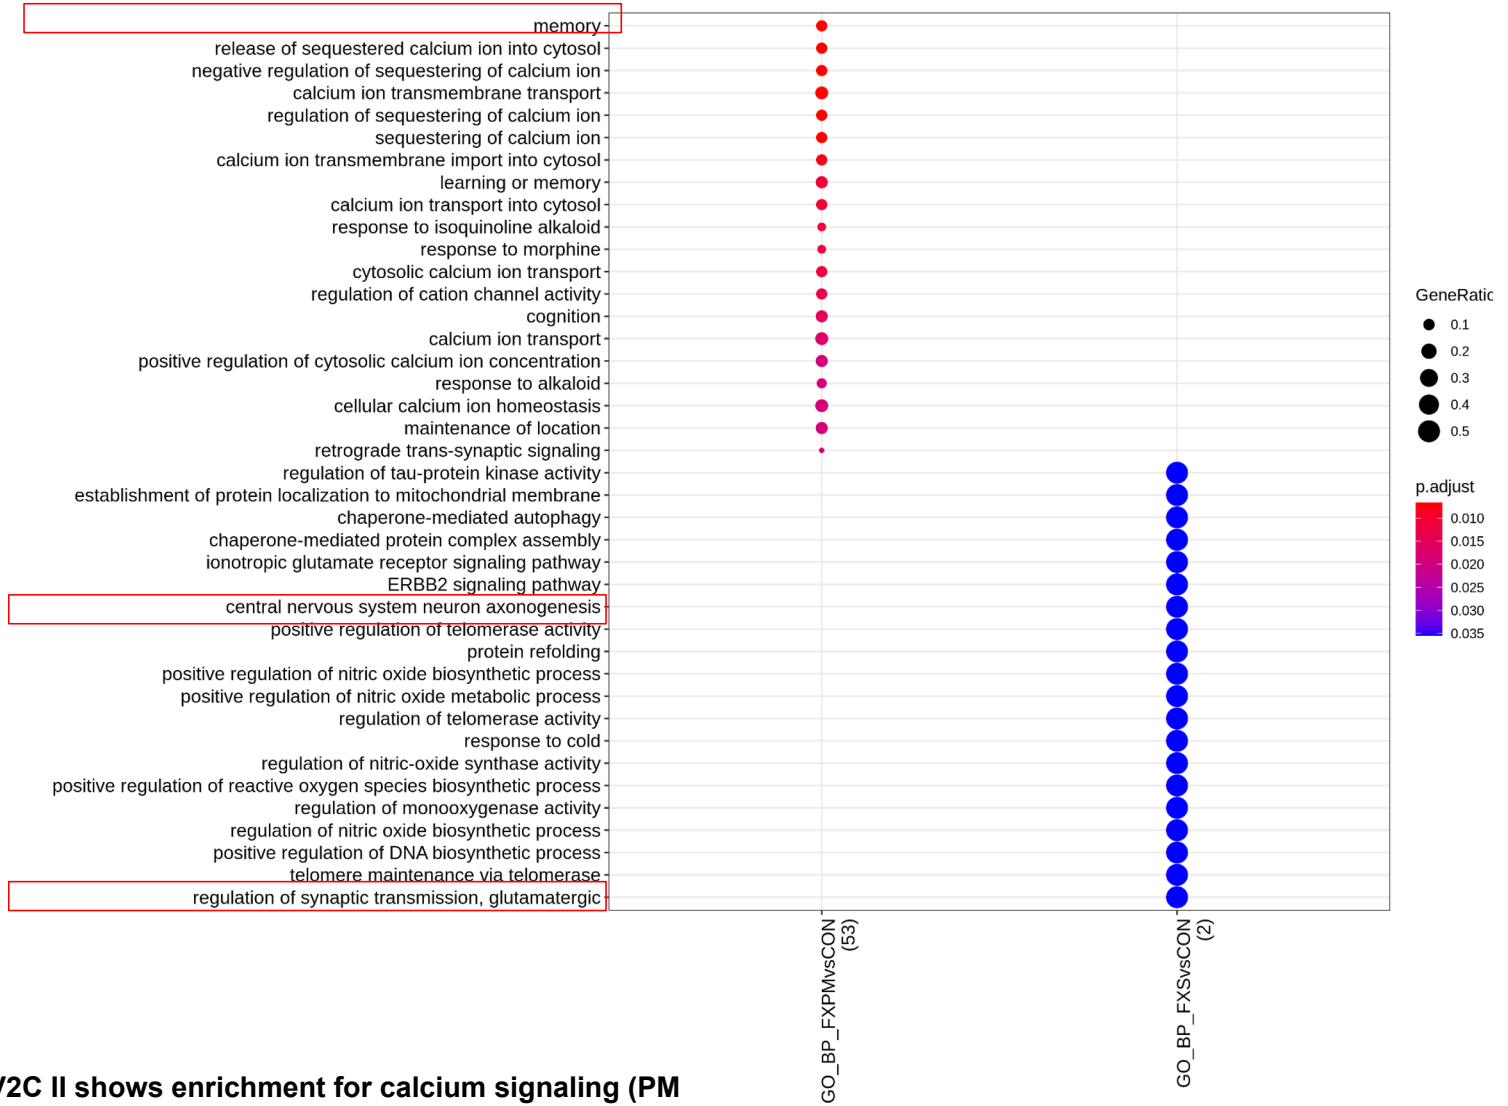

GO Biological Process for SV2C II shows enrichment for calcium signaling (PM comparisons) and synaptic transmission (FXS comparisons).



# Inh-SV2C II

## KEGG

### Top 20

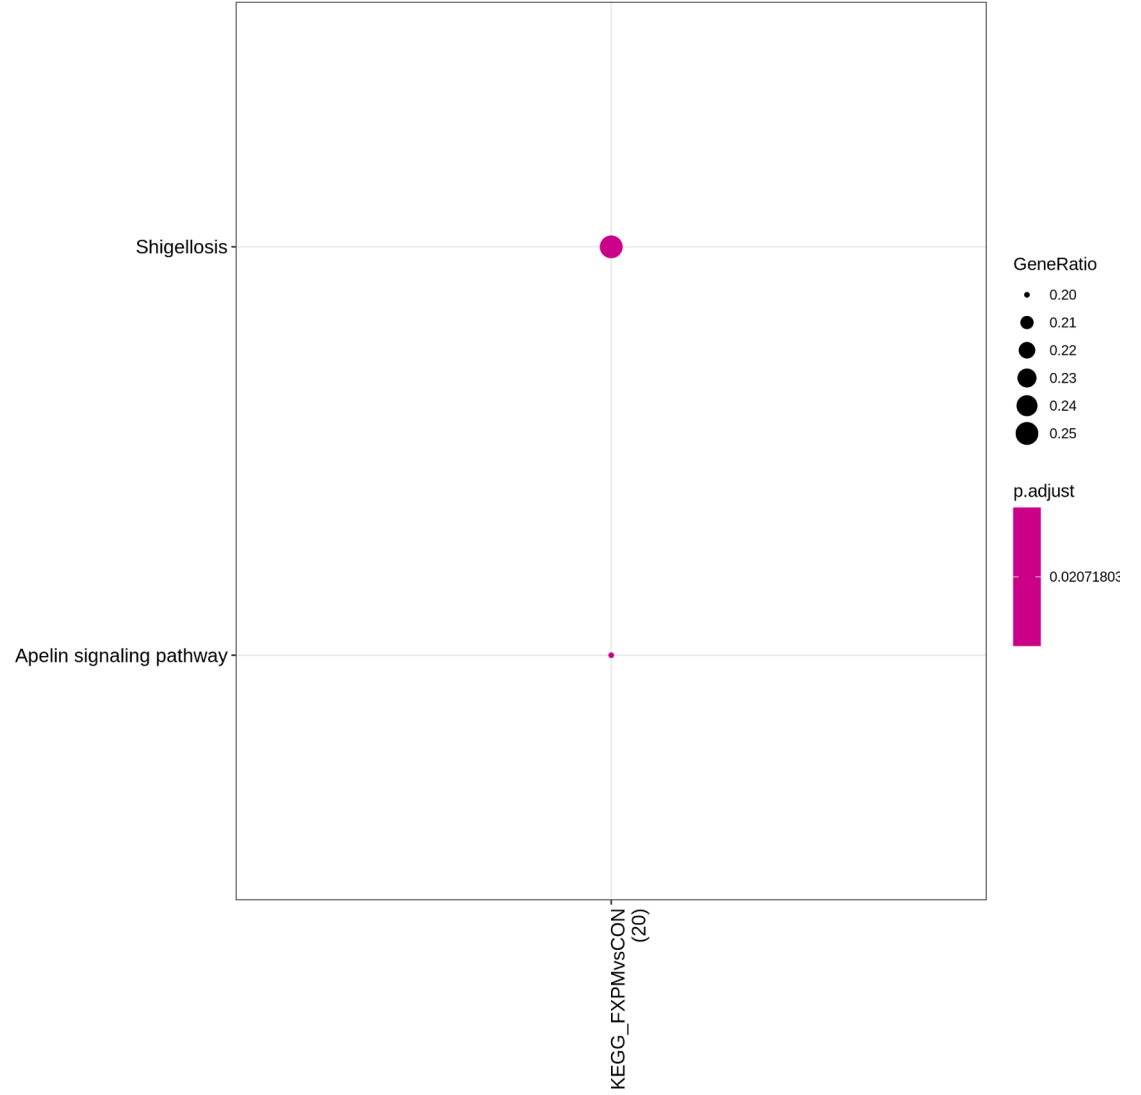

# Inh-VIP

# GO\_BP

# Top 20

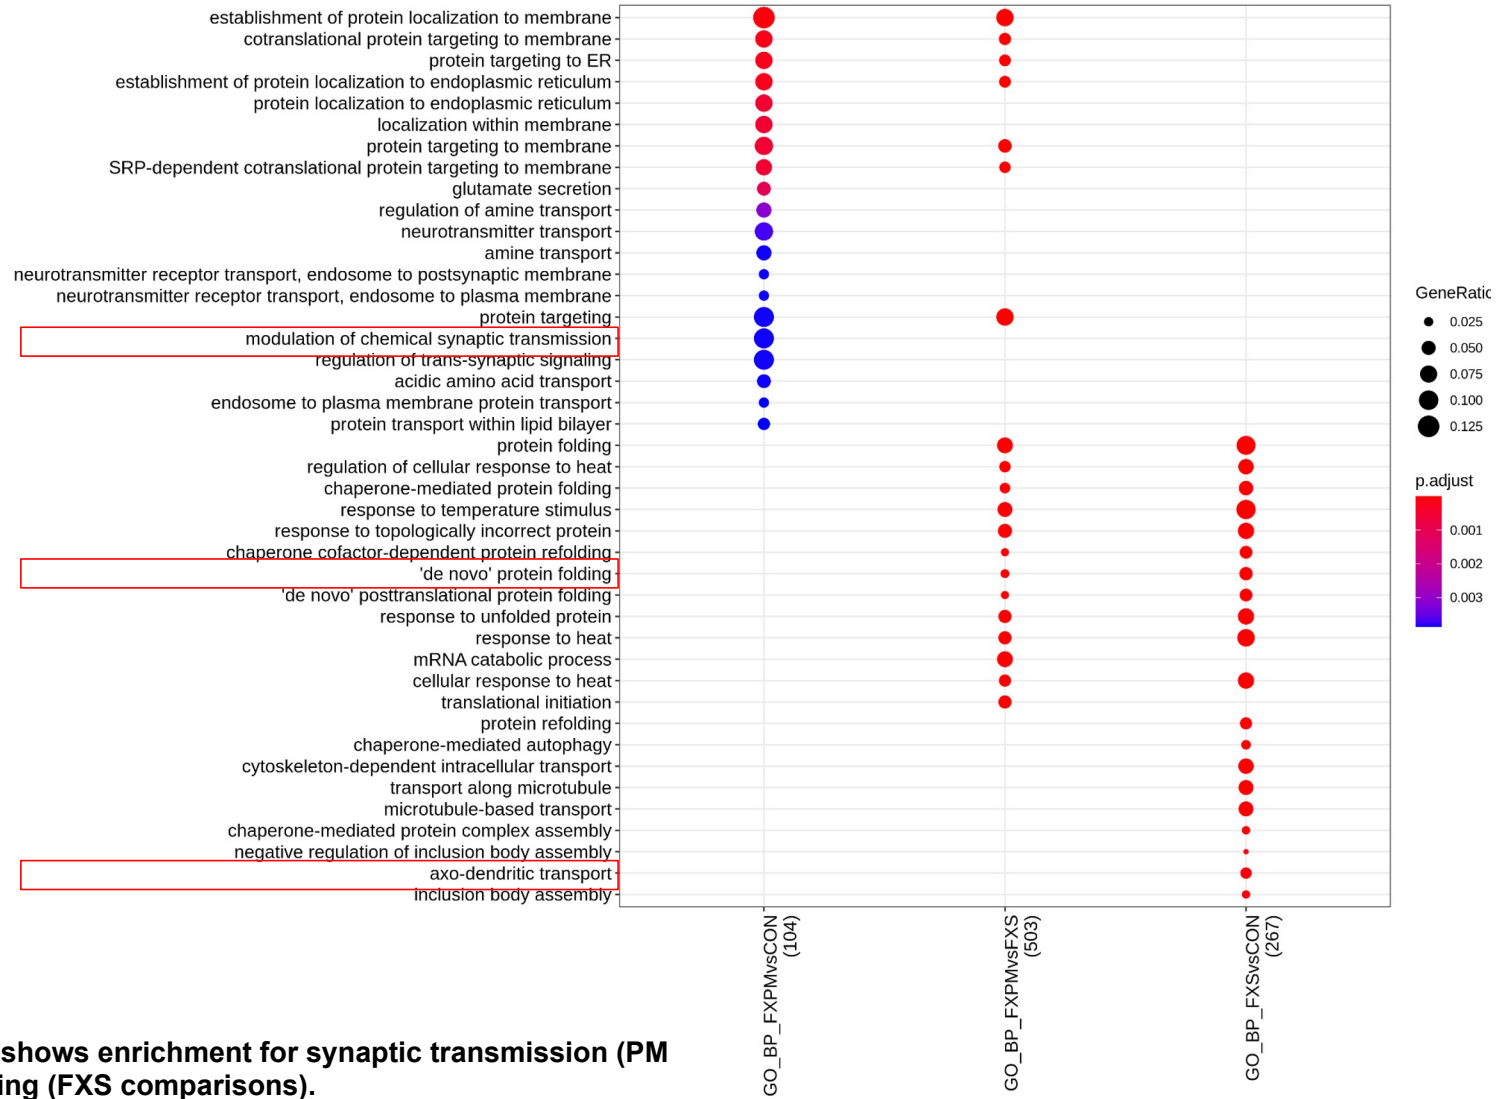

GO Biological Process for VIP shows enrichment for synaptic transmission (PM comparisons) and protein folding (FXS comparisons).

# Inh-VIP

# KEGG

# Top 20

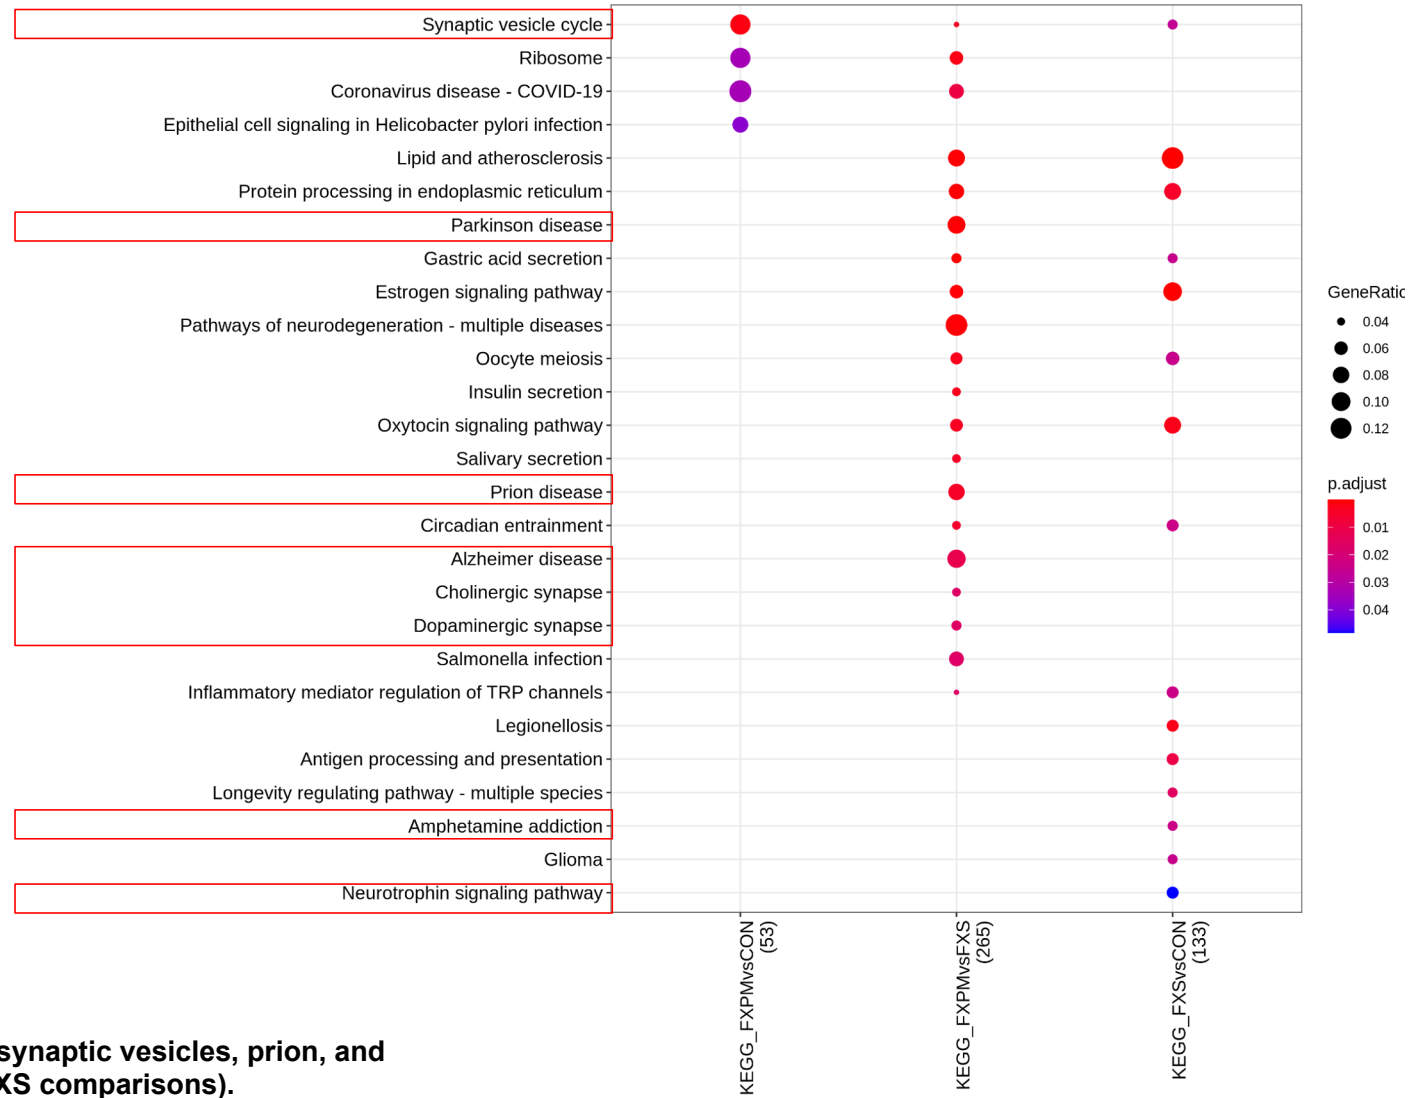

KEGG for VIP shows enrichment for synaptic vesicles, prion, and neurodegenerative terms (PM and FXS comparisons).

# Microglia

## GO\_BP

## Top 20

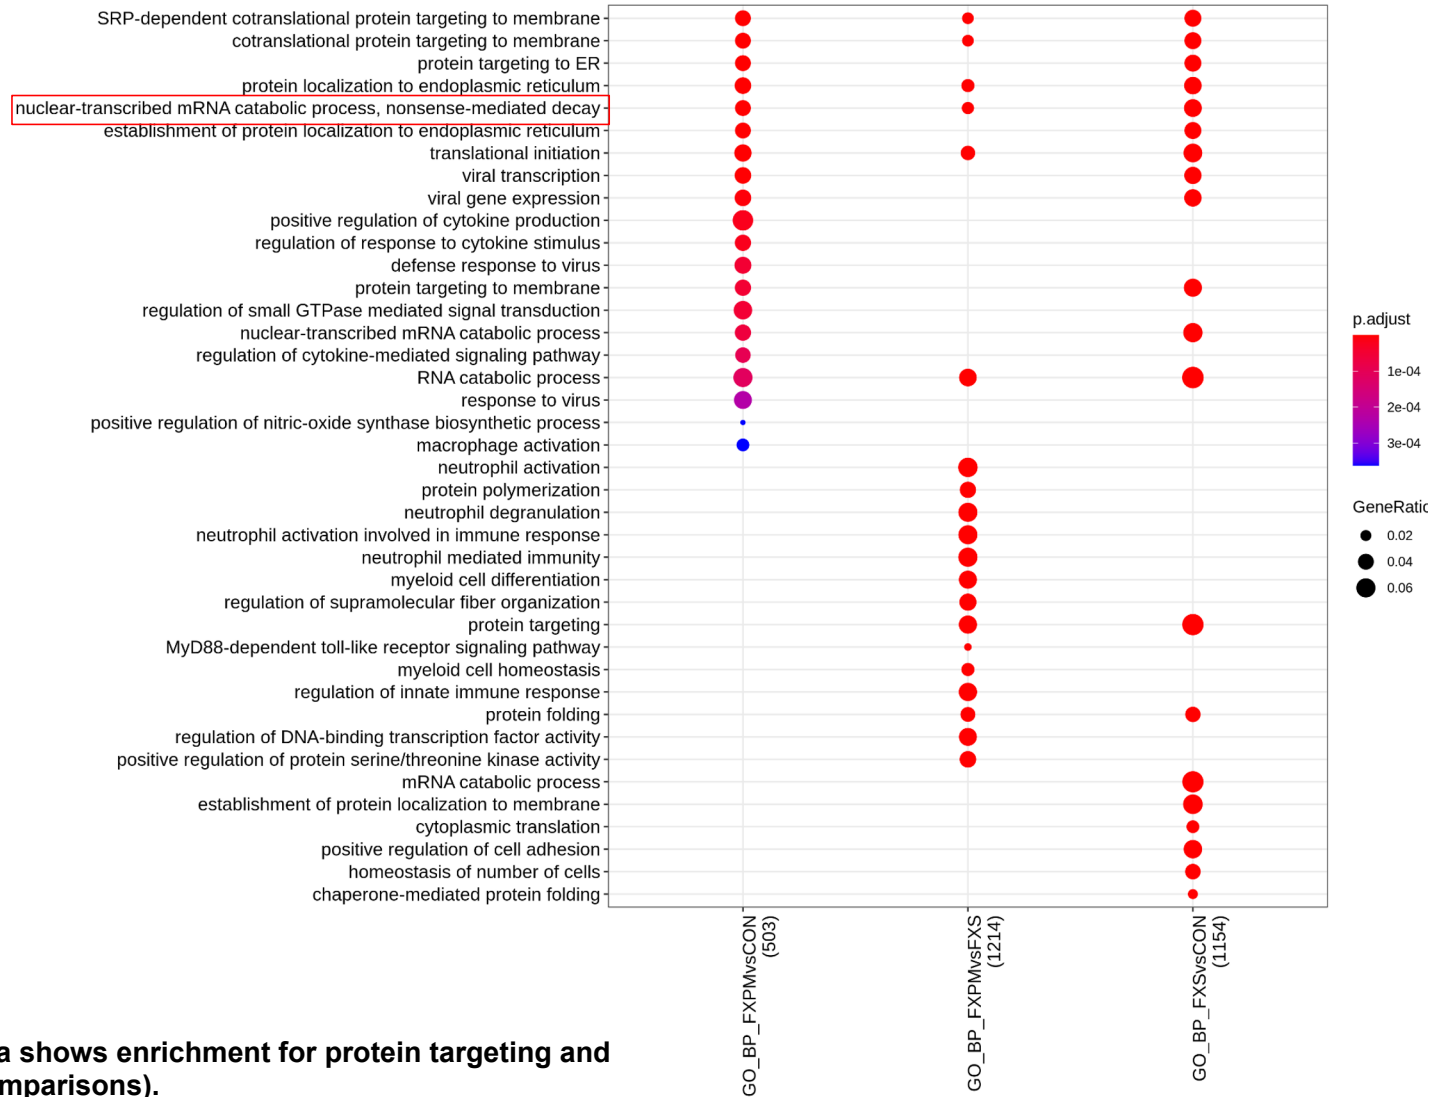

# Microglia

## KEGG

### Top 20

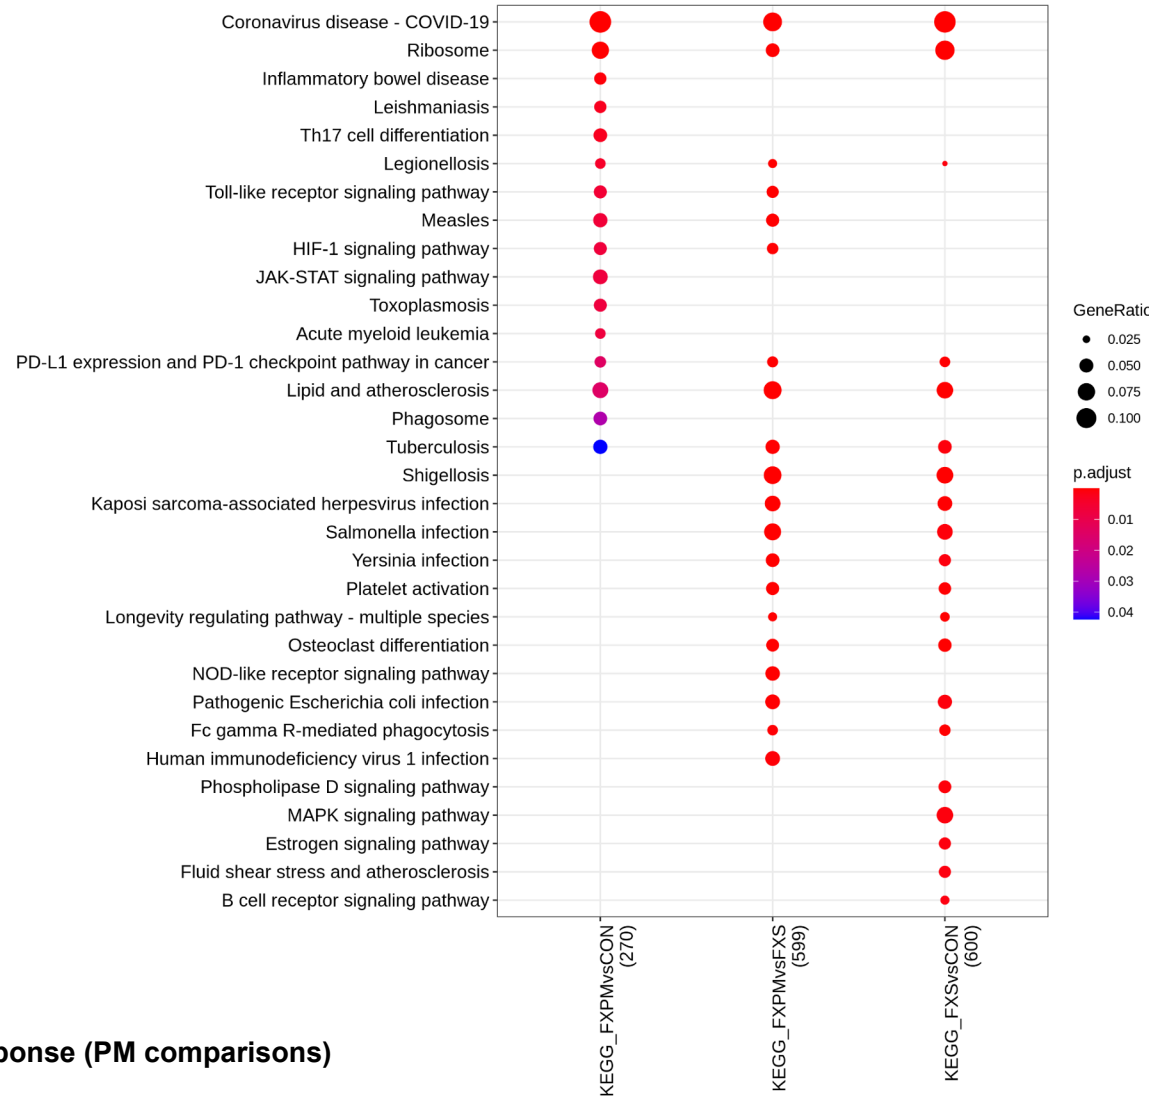

**KEGG for microglia shows enrichment for infection response (PM comparisons) and MAPK signaling (FXS comparisons).**

# MOL

# GO\_BP

# Top 20

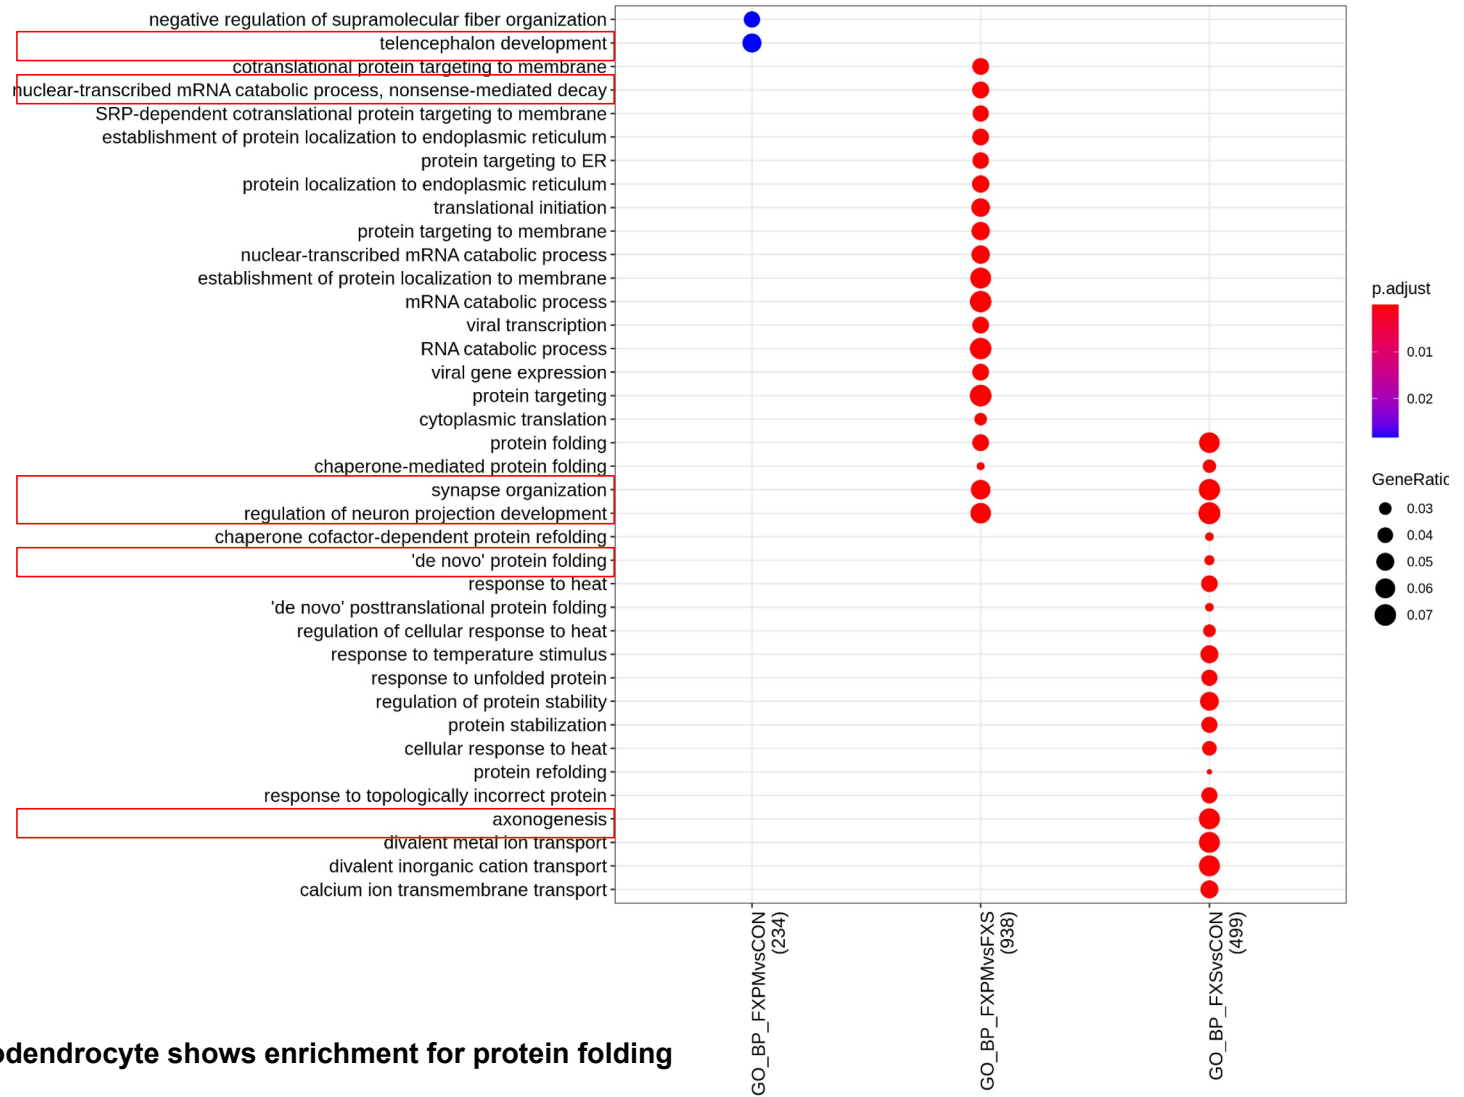

**GO Biological Processes for oligodendrocyte shows enrichment for protein folding (FXS comparisons).**

MOL

KEGG

Top 20

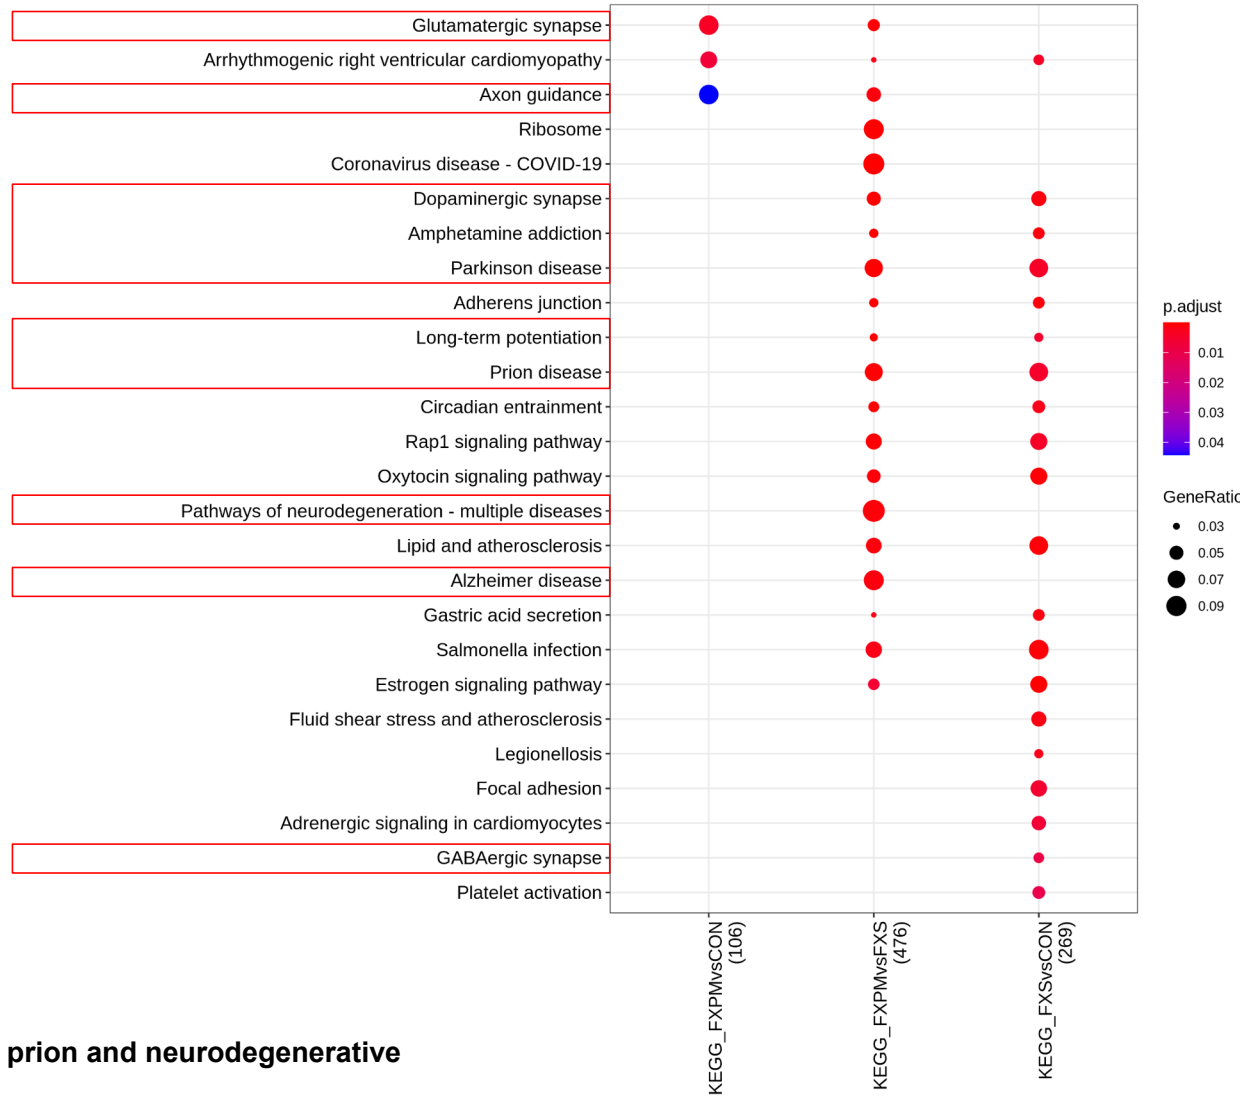

KEGG for oligodendrocyte shows enrichment for prion and neurodegenerative terms (FXS comparisons).

# Neu L4 I

## GO\_BP

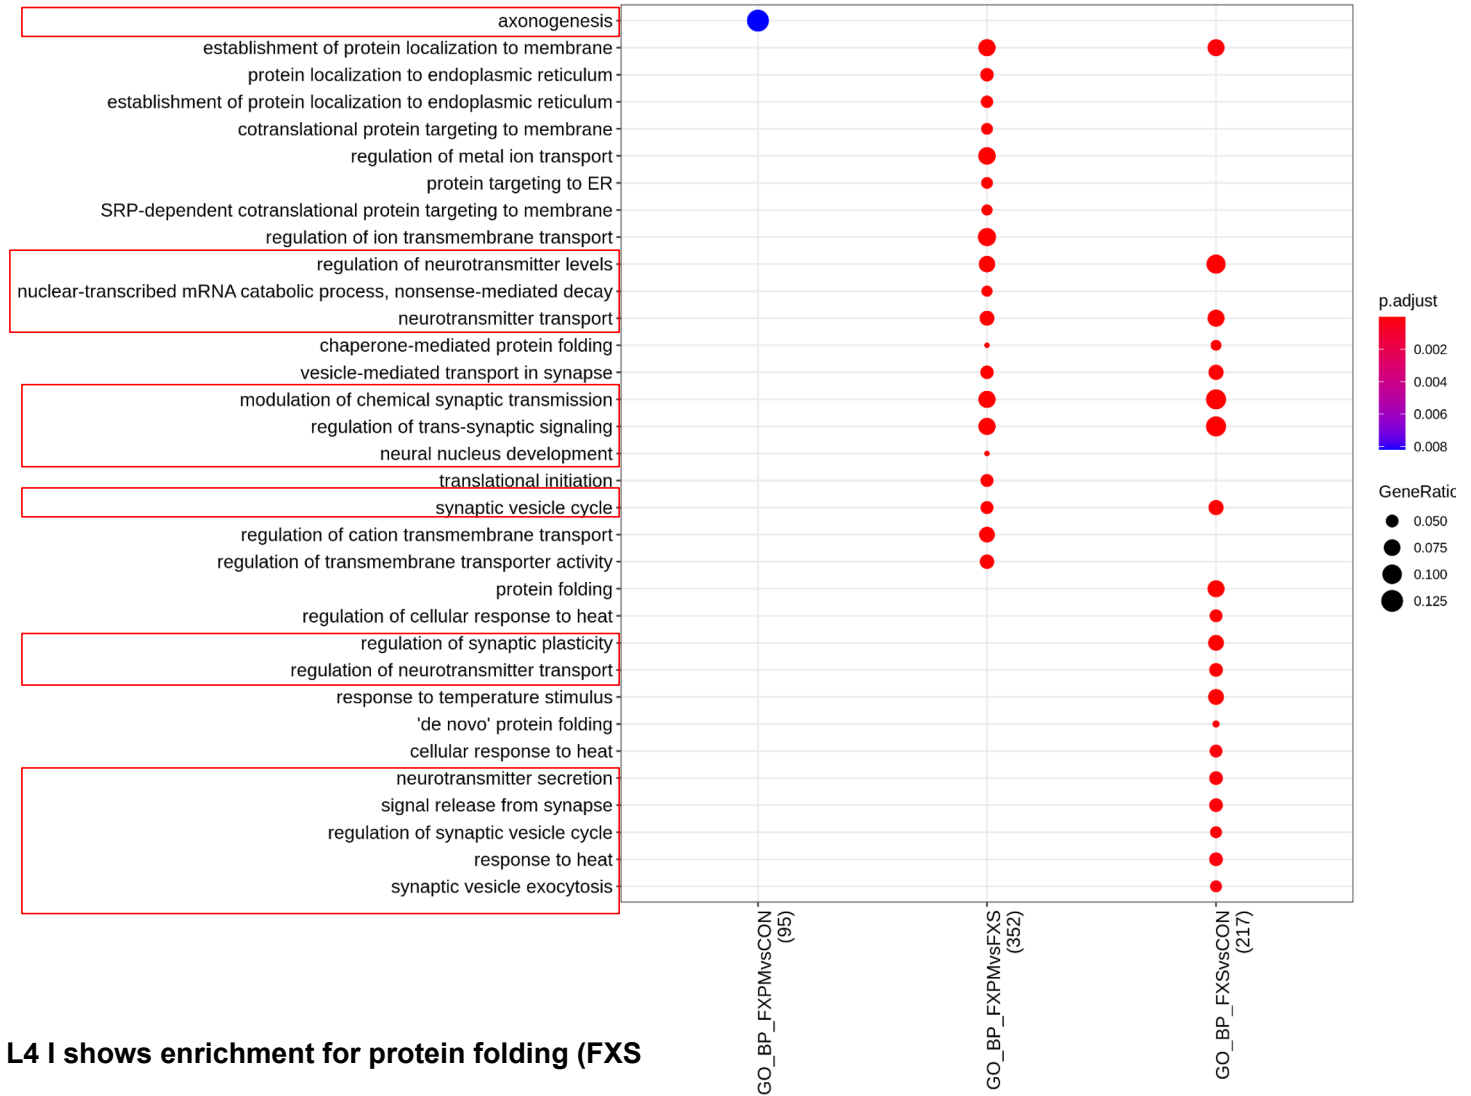

GO Biological Processes for Neu L4 I shows enrichment for protein folding (FXS comparisons).



# Neu L4 I

## KEGG

### Top 20

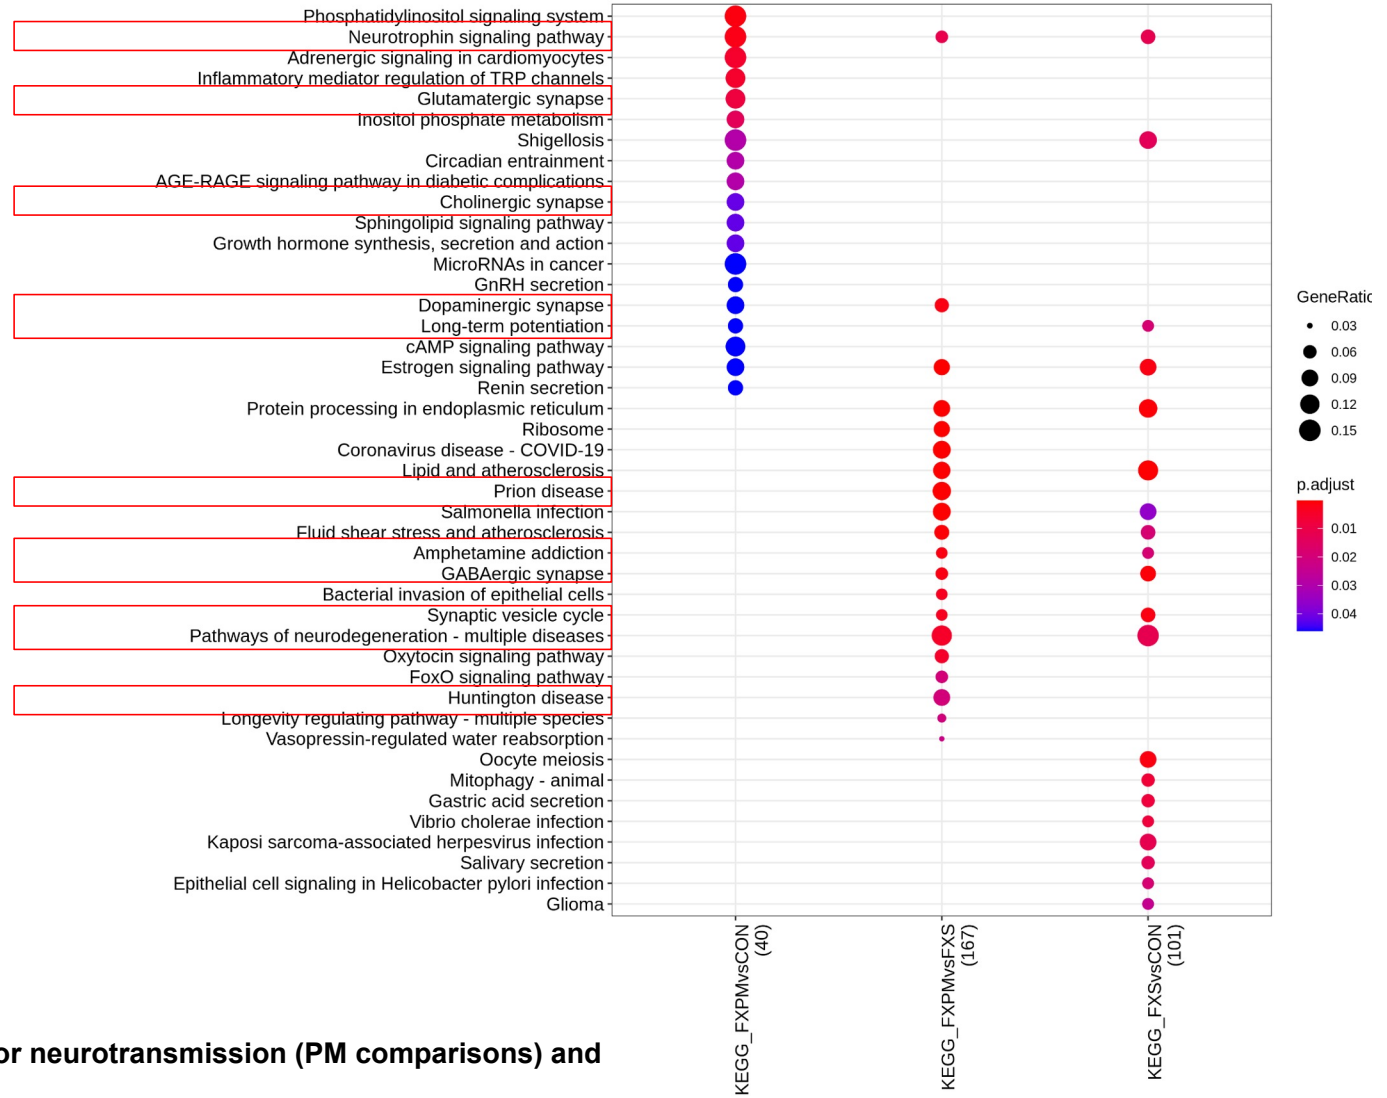

KEGG for Neu L4 I shows enrichment for neurotransmission (PM comparisons) and infection (FXS comparisons).

# Neu L4 II

## GO\_BP

## Top 20

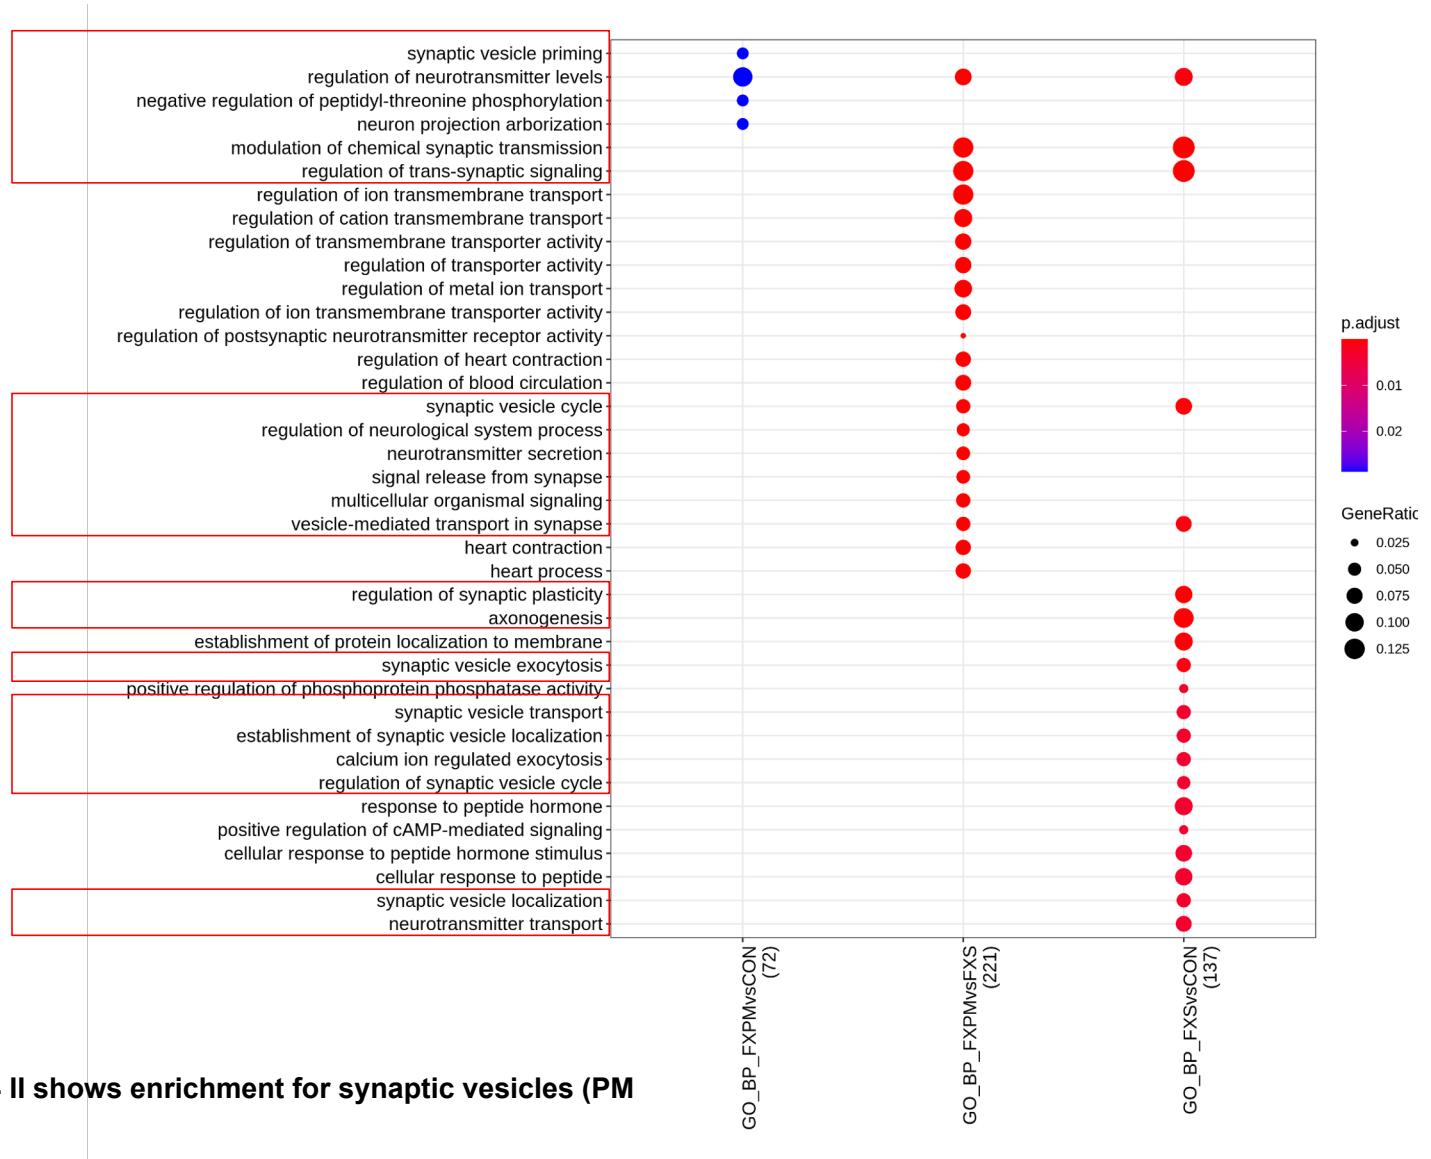

GO Biological Processes for Neu L4 II shows enrichment for synaptic vesicles (PM and FXS comparisons).

# Neu L4 II

## KEGG

### Top 20

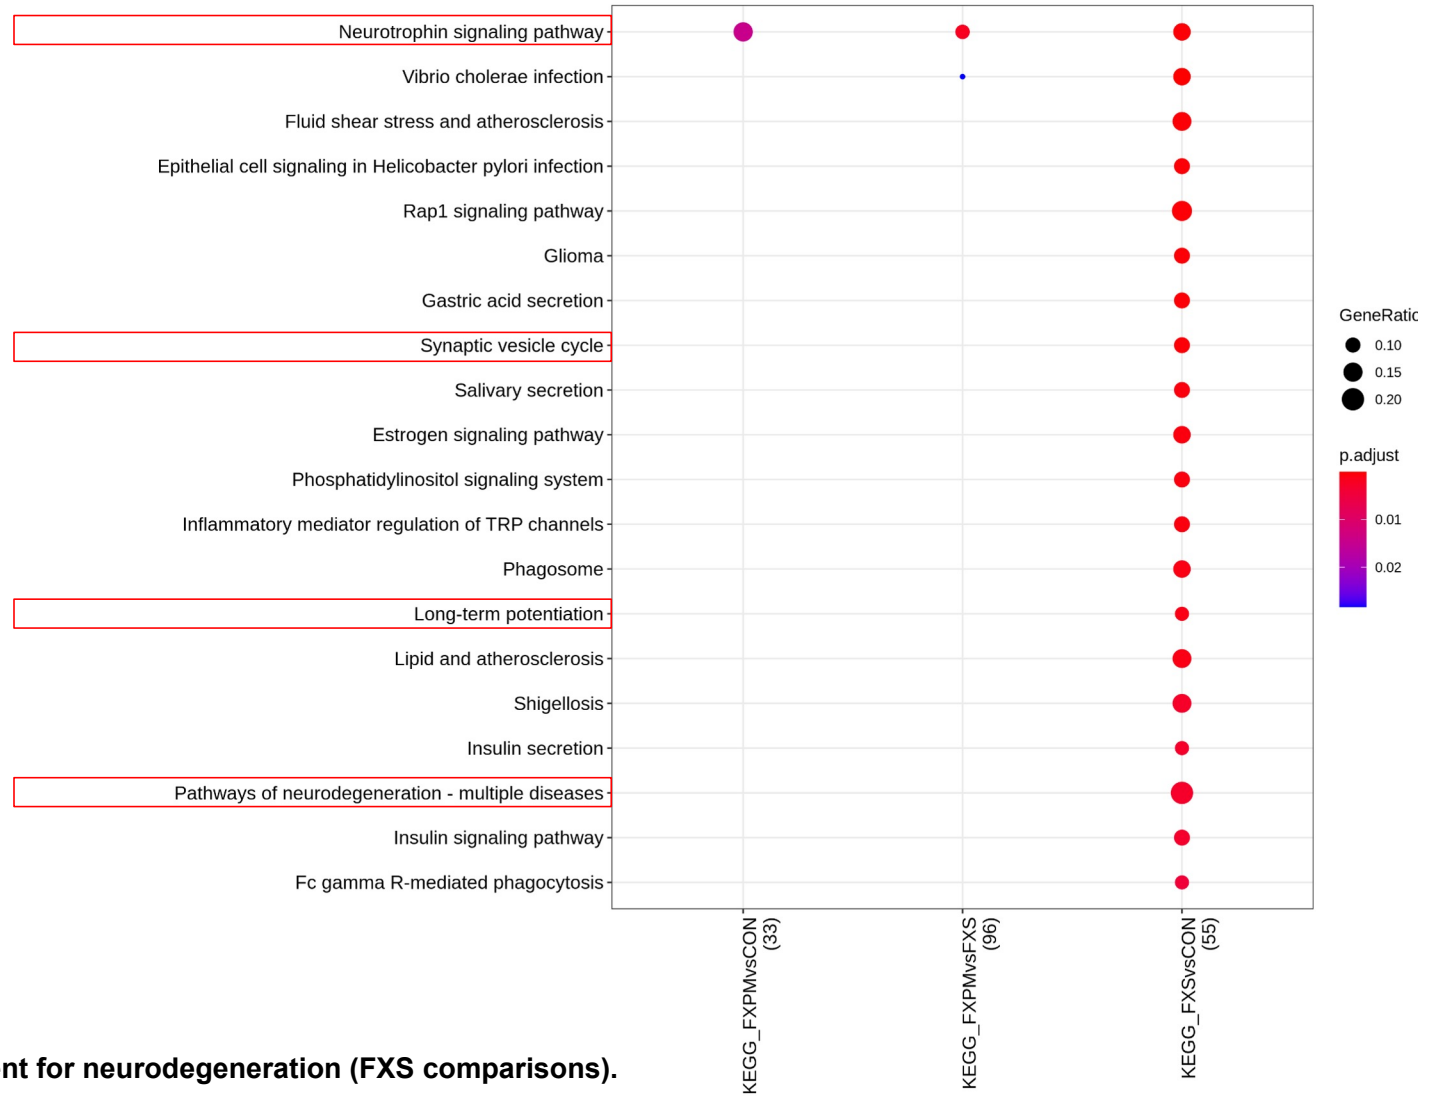

KEGG for Neu L4 II shows enrichment for neurodegeneration (FXS comparisons).

# Neu NRGN

## GO\_BP

## Top 20

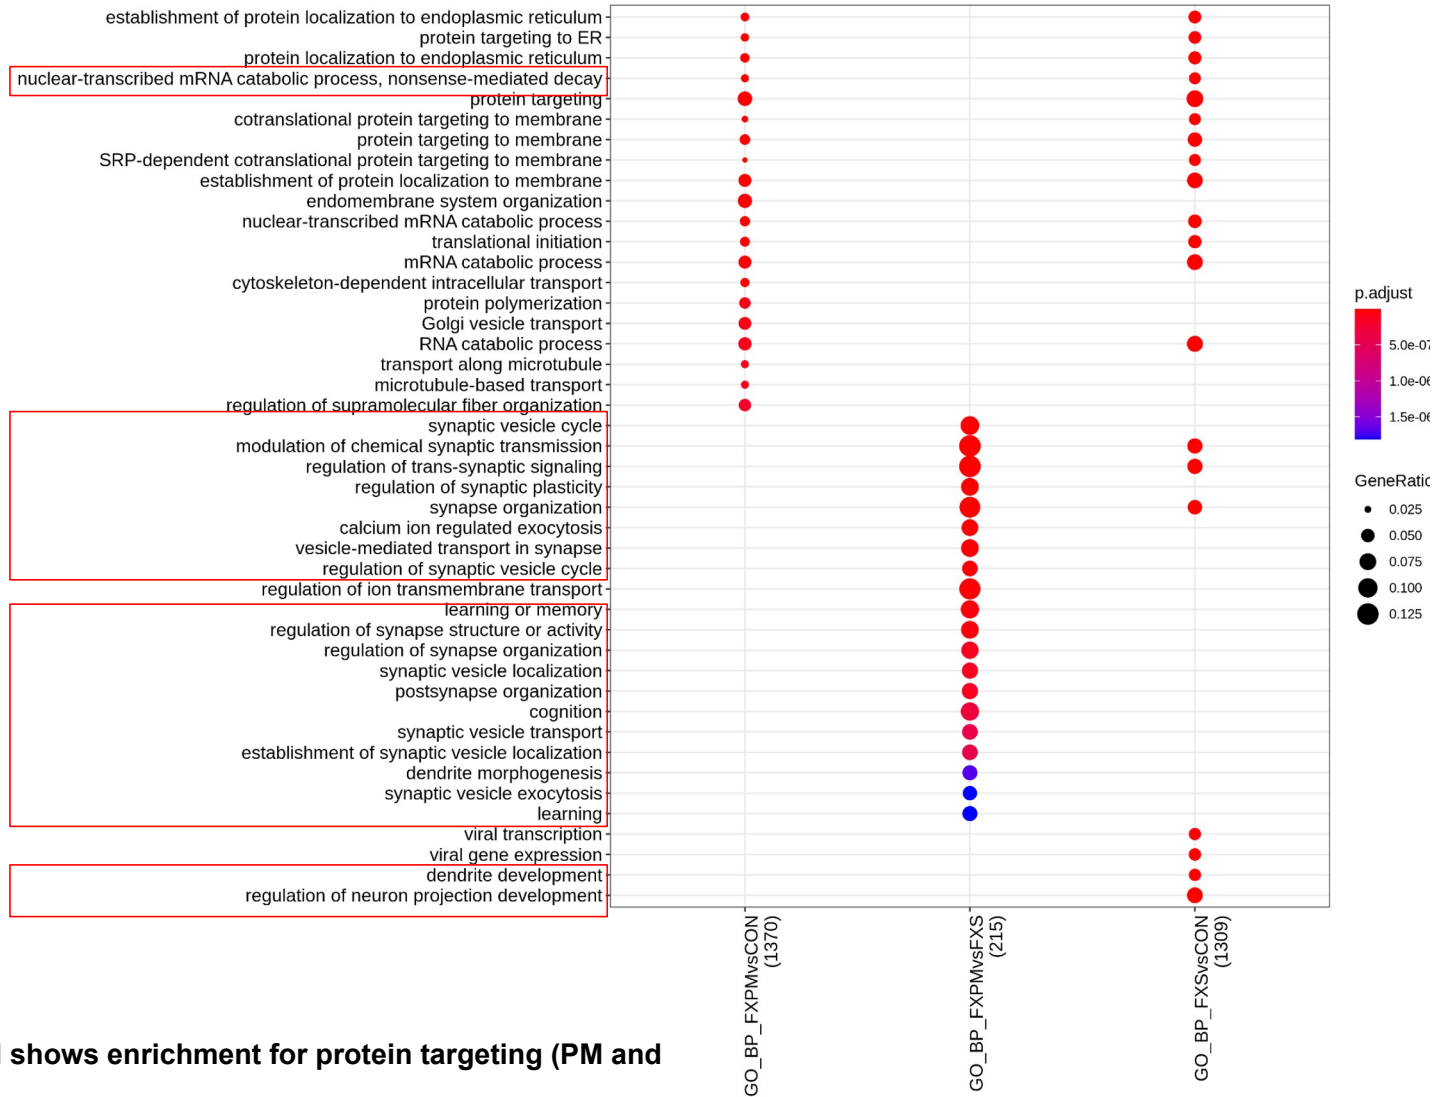

GO Biological Processes for NRGN shows enrichment for protein targeting (PM and FXS comparisons).

# Neu NRGN

## KEGG

### Top 20

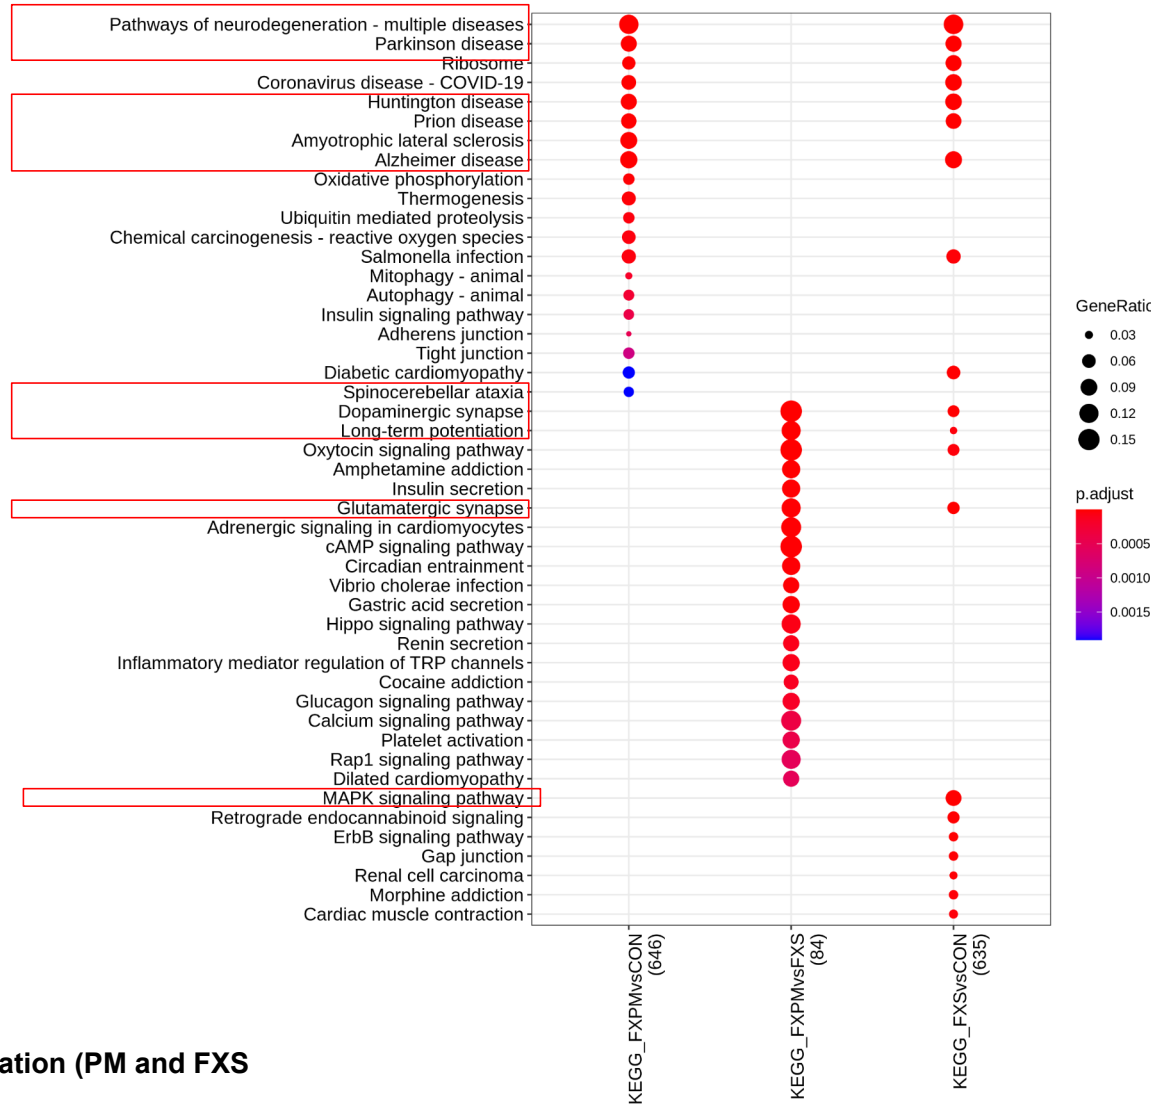

KEGG for NRGN shows enrichment for neurodegeneration (PM and FXS comparisons).

# Neu NTNG2

## GO\_BP

### Top 20

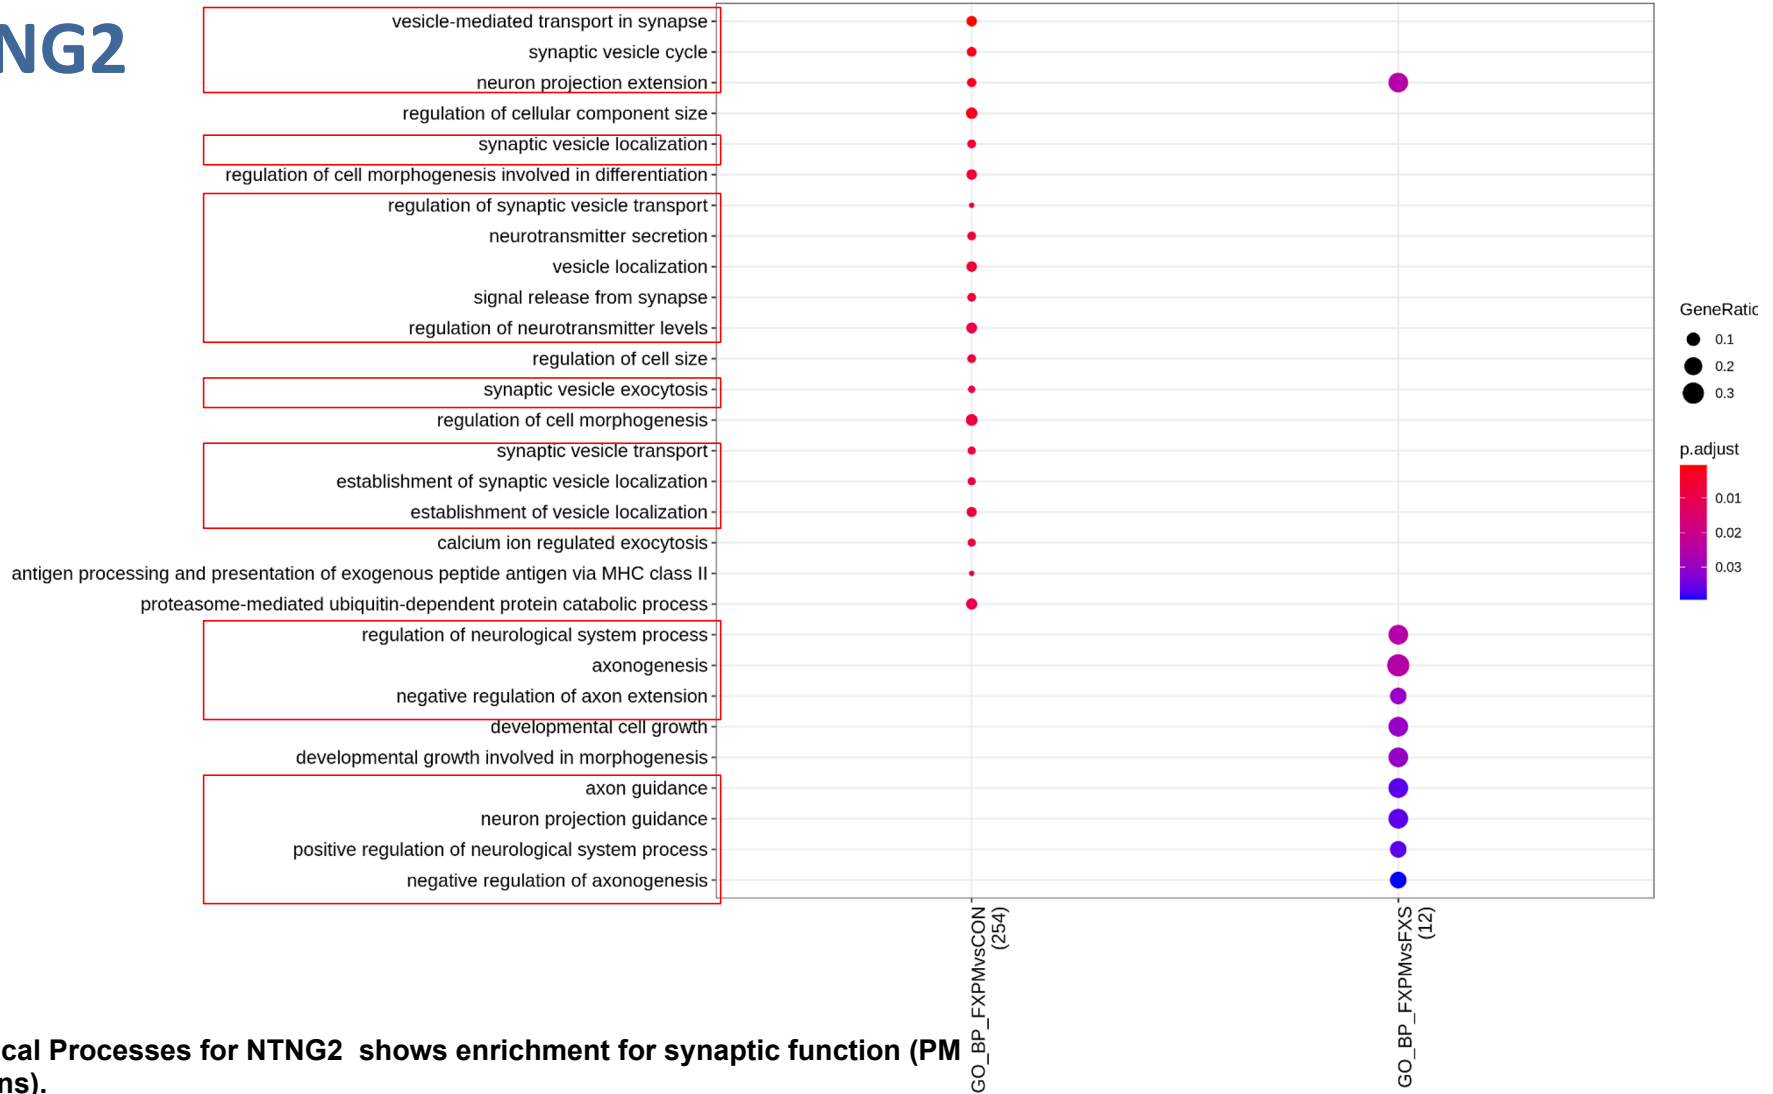

GO Biological Processes for NTNG2 shows enrichment for synaptic function (PM comparisons).

# Neu NTNG2

## KEGG

### Top 20

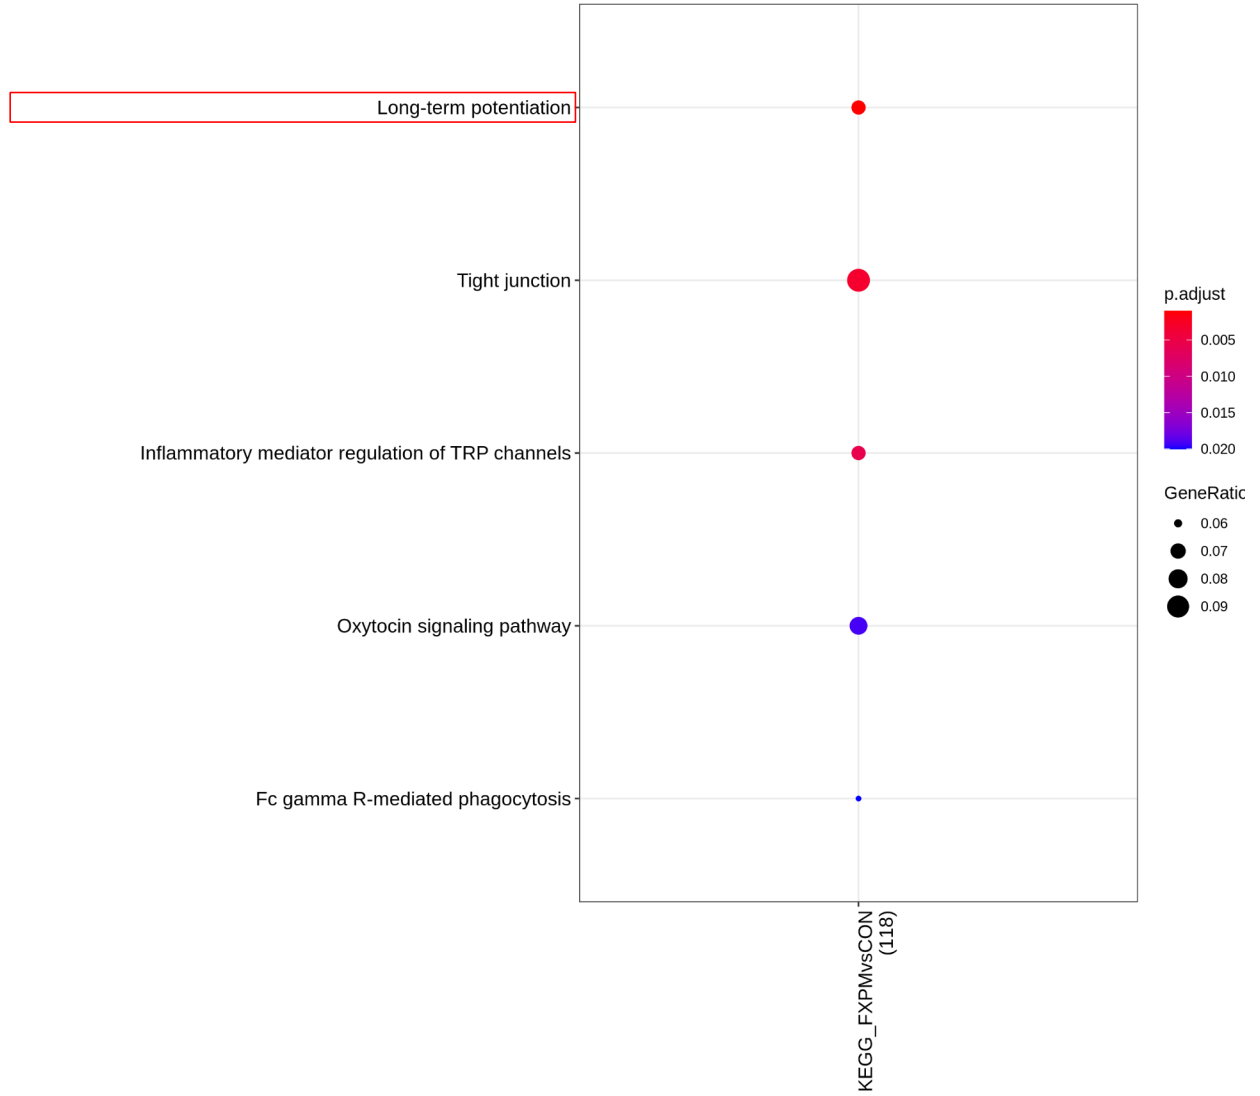

OLI

GO\_BP

Top 20

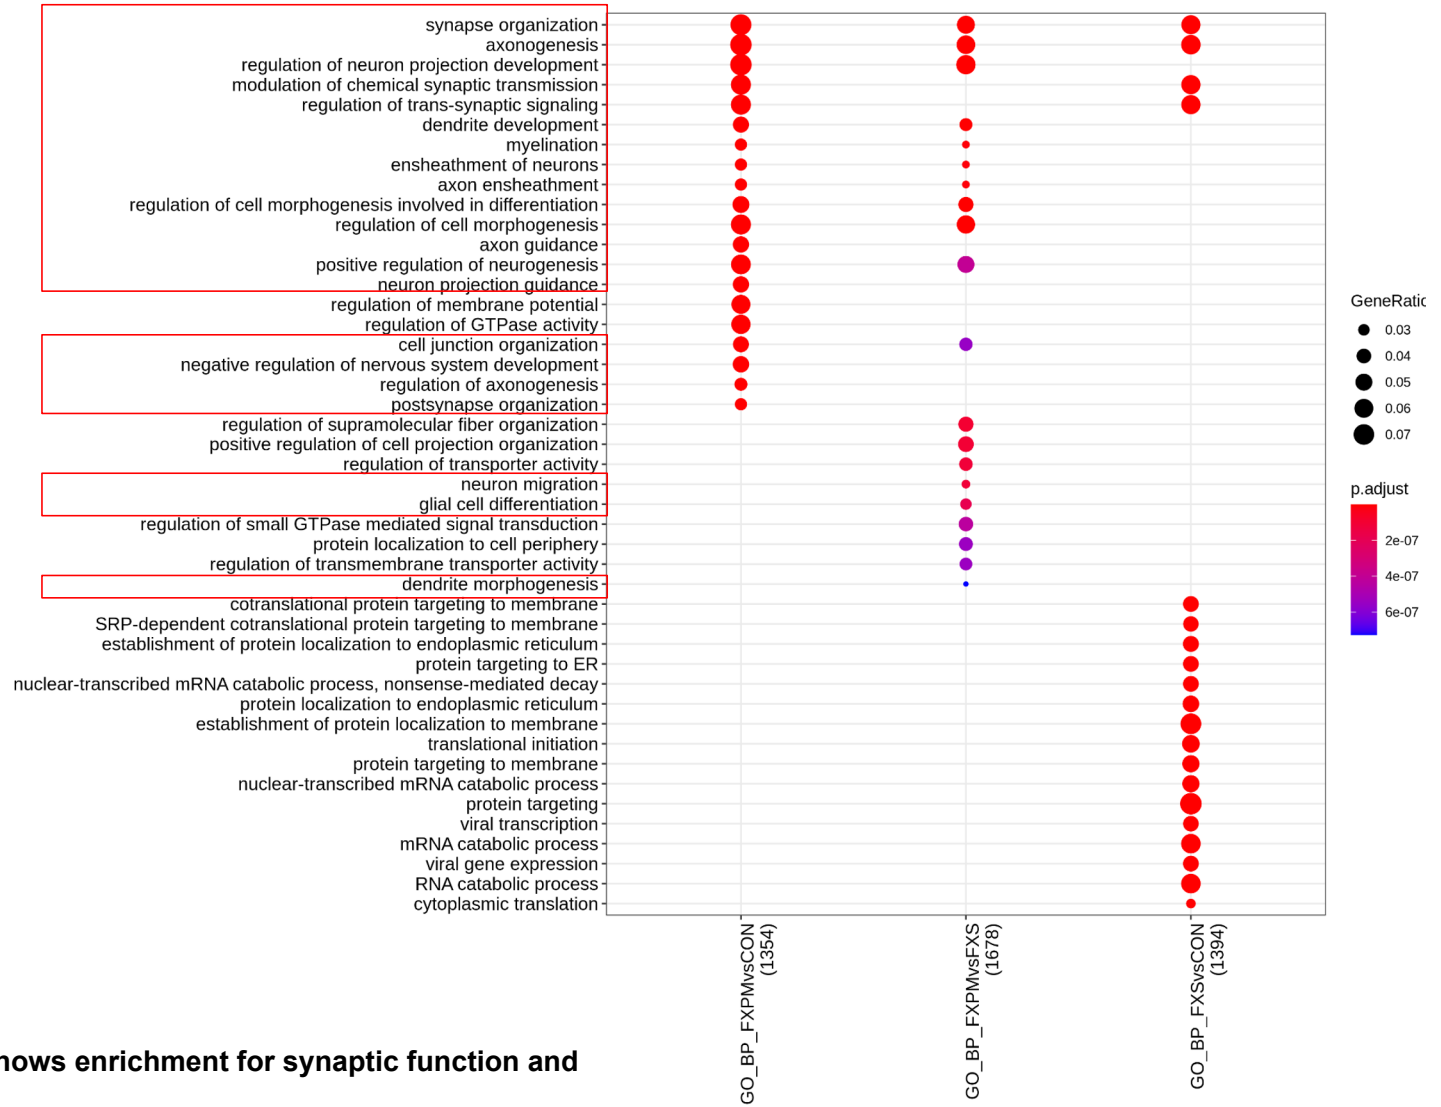

GO Biological Processes for OLI shows enrichment for synaptic function and myelination (PM comparisons).



OLI

KEGG

Top 20

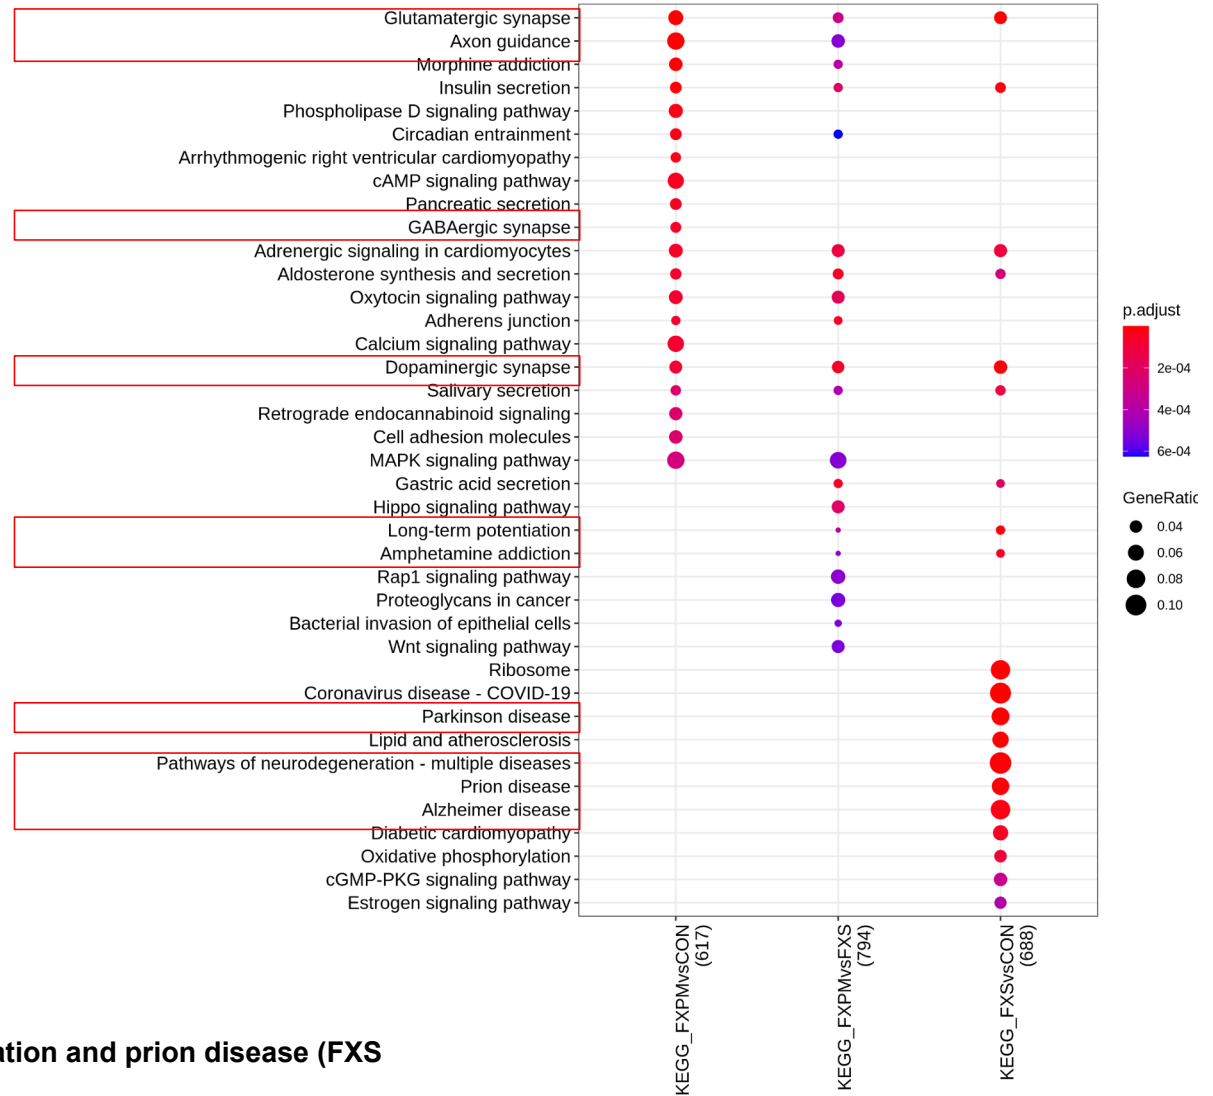

KEGG for OLI shows enrichment for neurodegeneration and prion disease (FXS comparisons).

# OL II

# GO\_BP

# Top 20

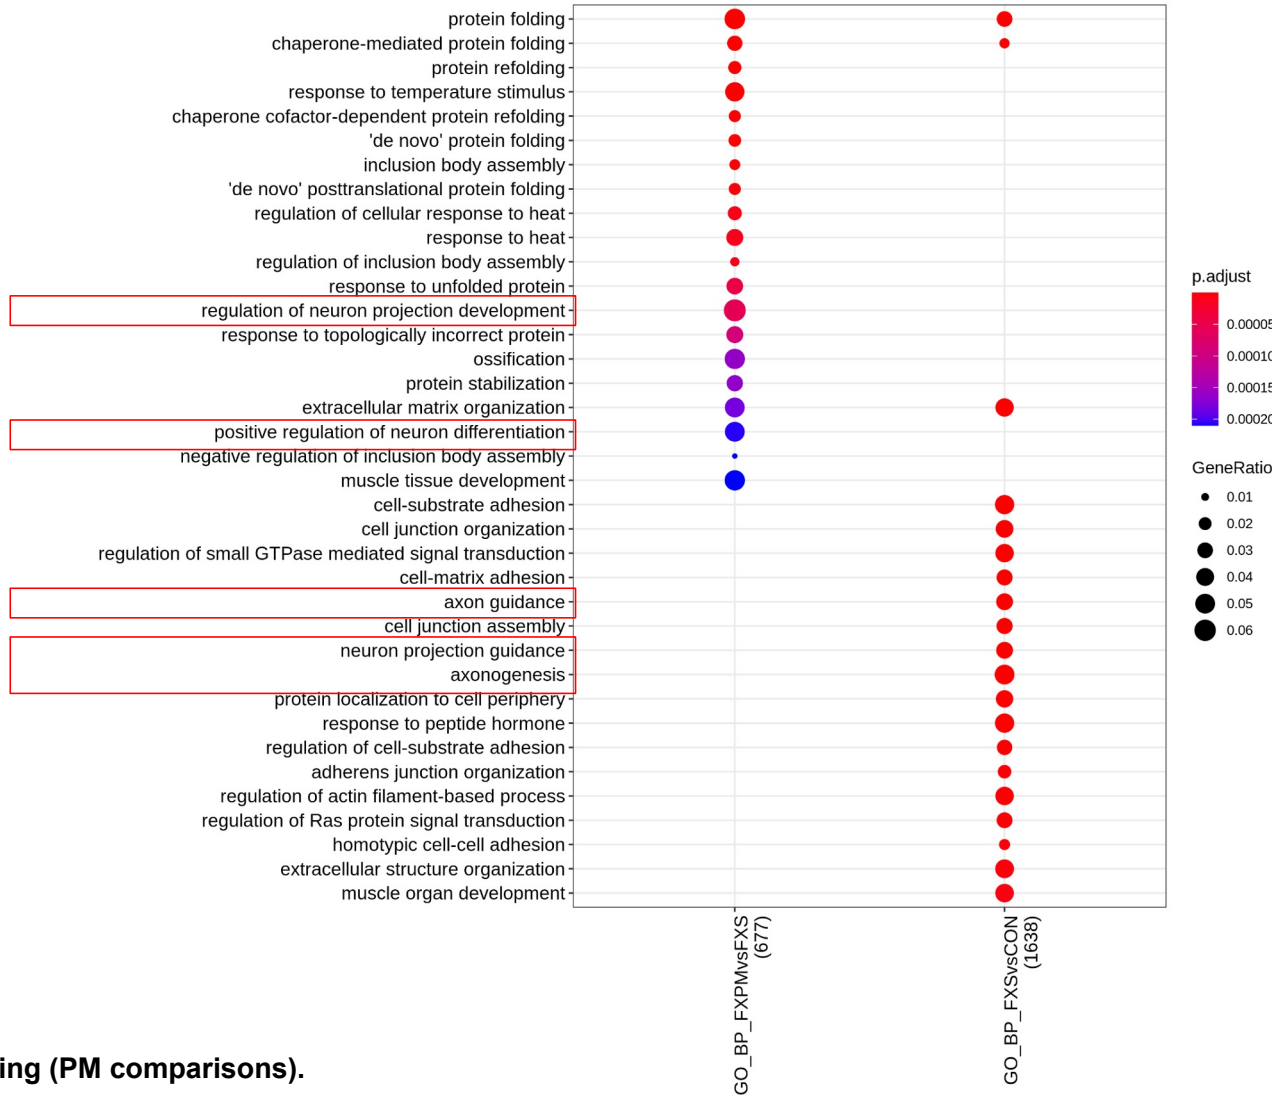

GO for OLII shows enrichment for protein folding (PM comparisons).

OL II

KEGG

Top 20

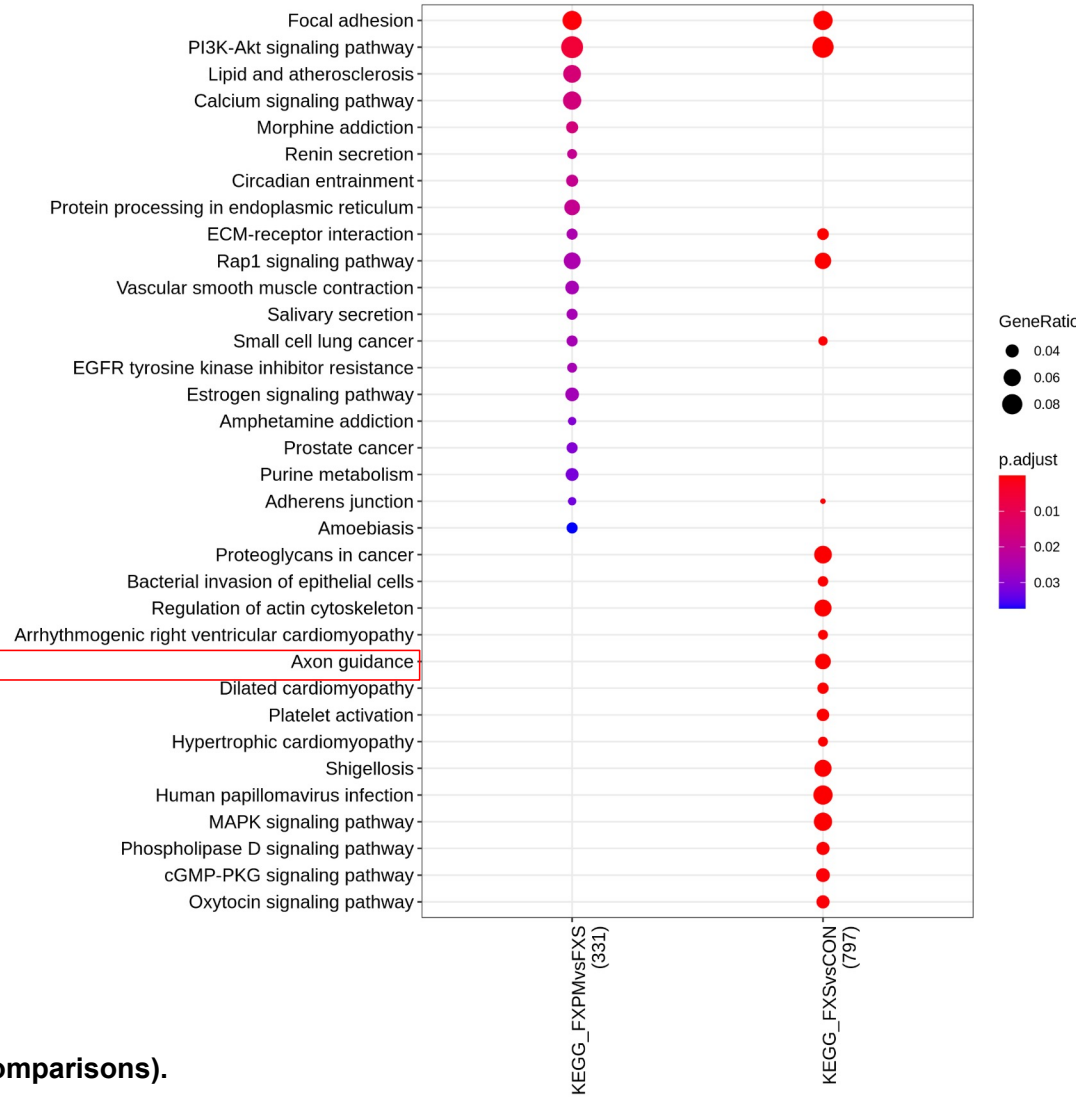

KEGG for OLII shows enrichment for axon guidance (FXS comparisons).

OPC

GO\_BP

Top 20

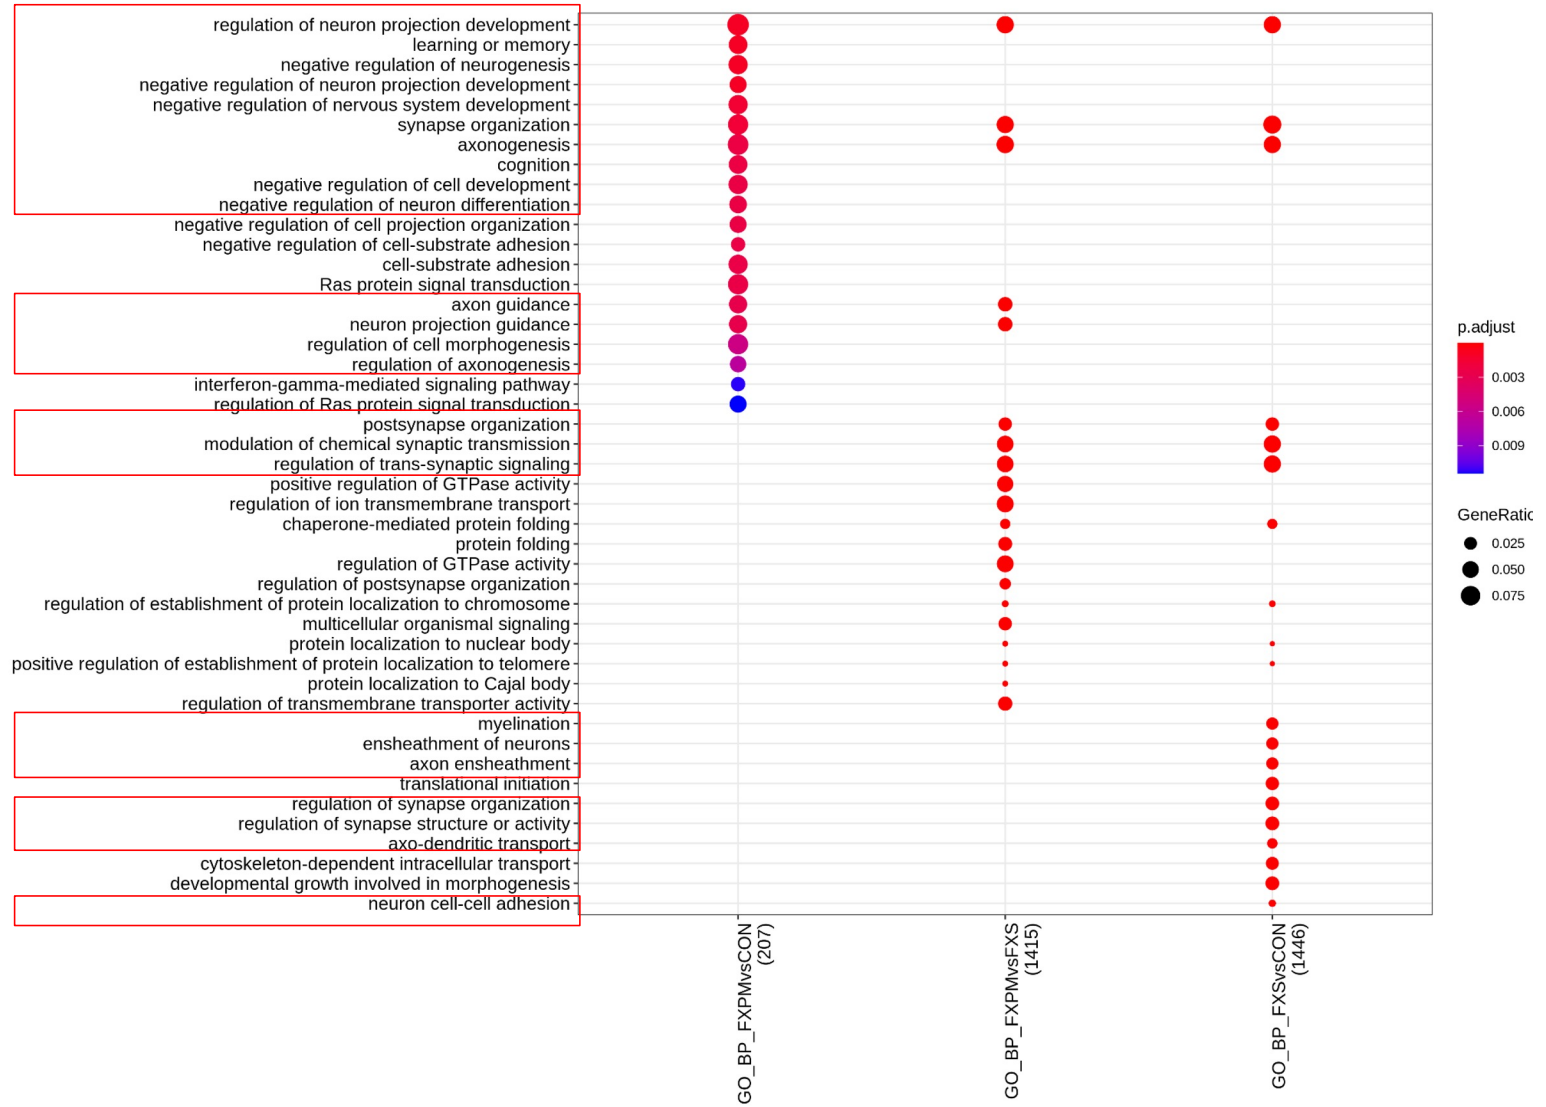

GO for OPC shows enrichment for cognition (PM comparisons) and myelination (FXS comparisons).

OPC

KEGG

Top 20

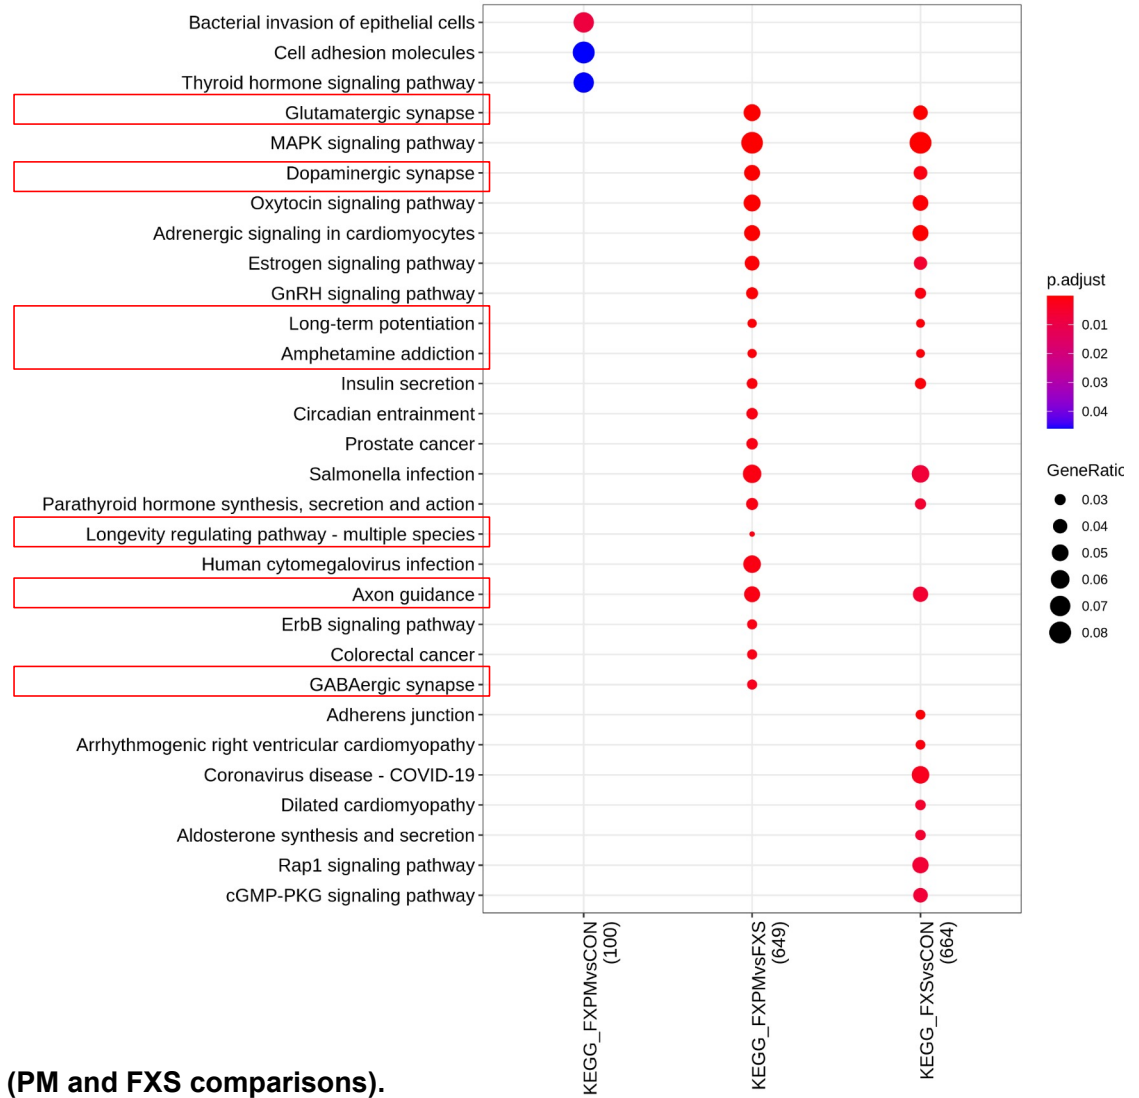

KEGG for OPC shows enrichment for MAPK signaling (PM and FXS comparisons).

L2/3-4

GO BP

Top 20

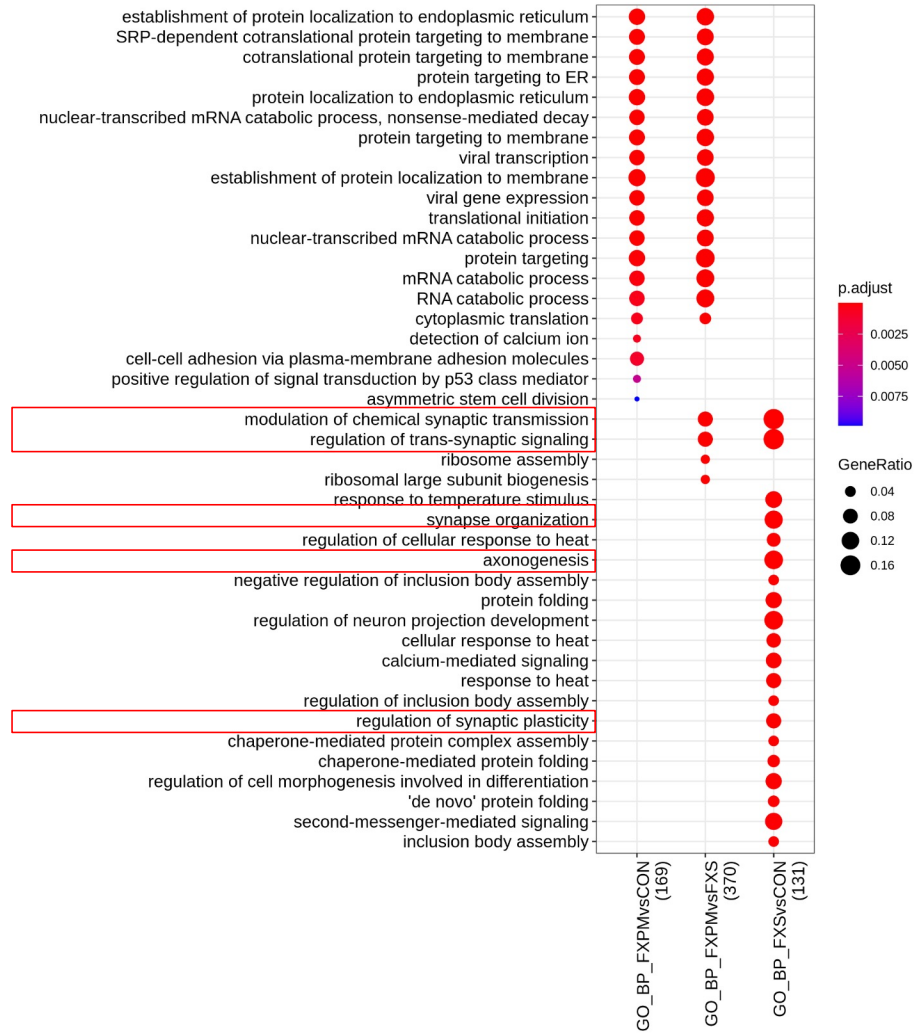

GO for L2/3-4 shows enrichment for protein targeting (PM comparisons).

# L2/3-4

# KEGG

# Top 20

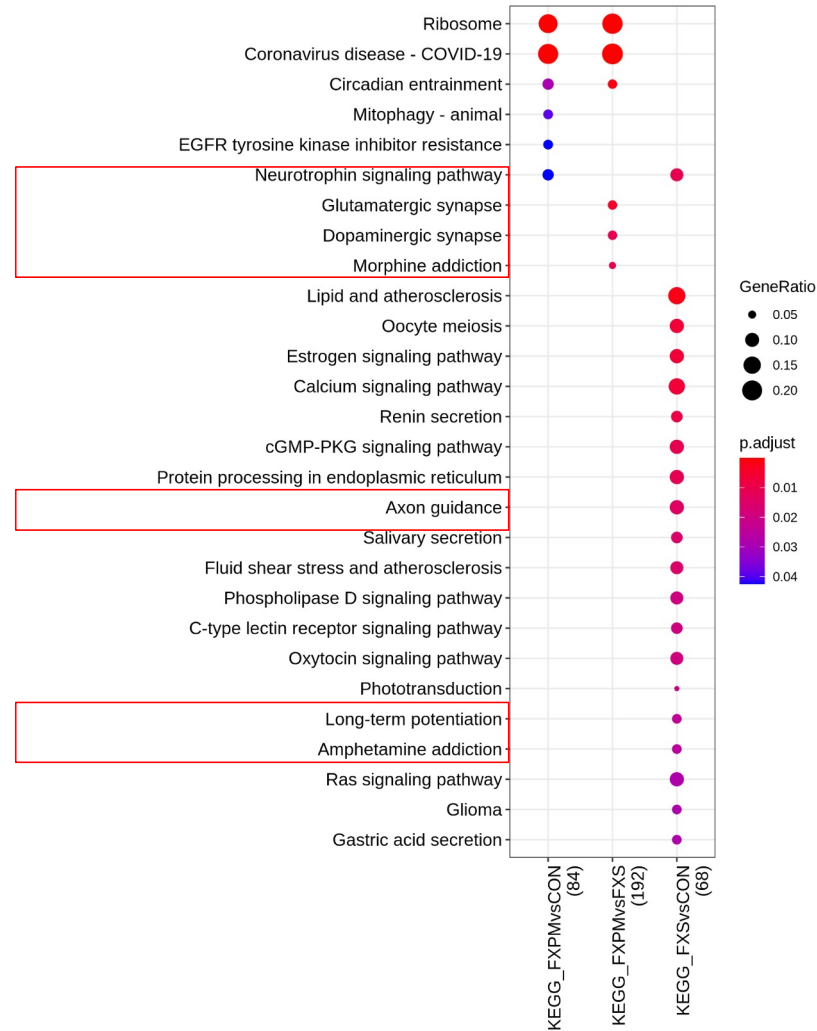

KEGG for L2/3-4 shows enrichment for axon guidance (FXS comparisons).

L5/6 I

GO BP

Top 20

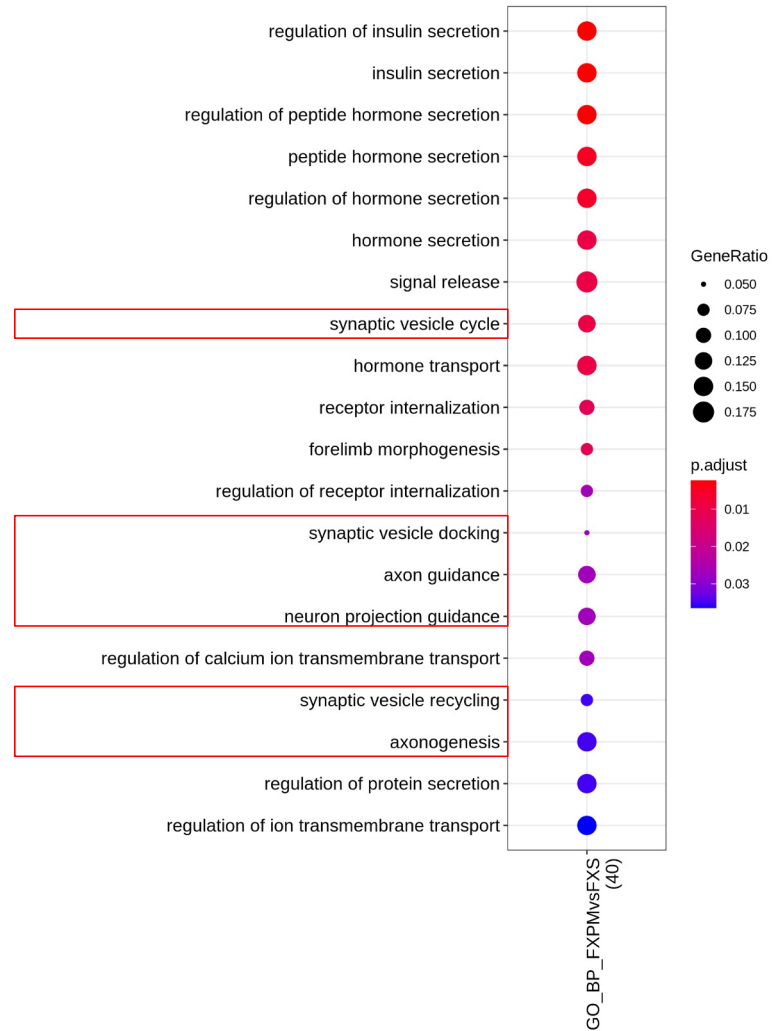



L5/6 I

KEGG

Top 20

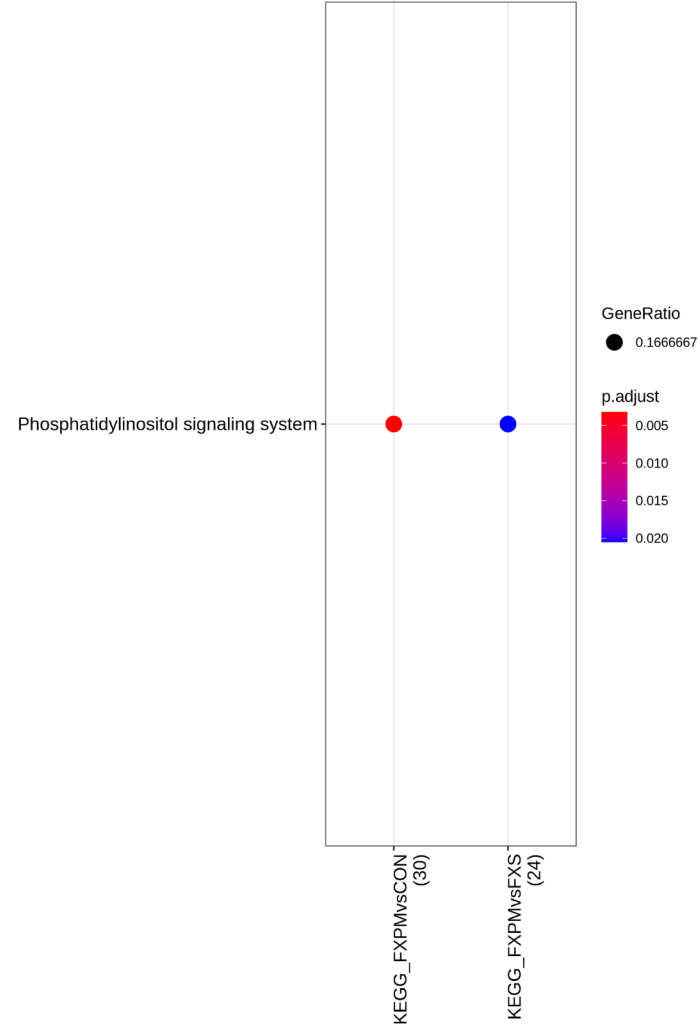

L5/6 II

GO BP

Top 20

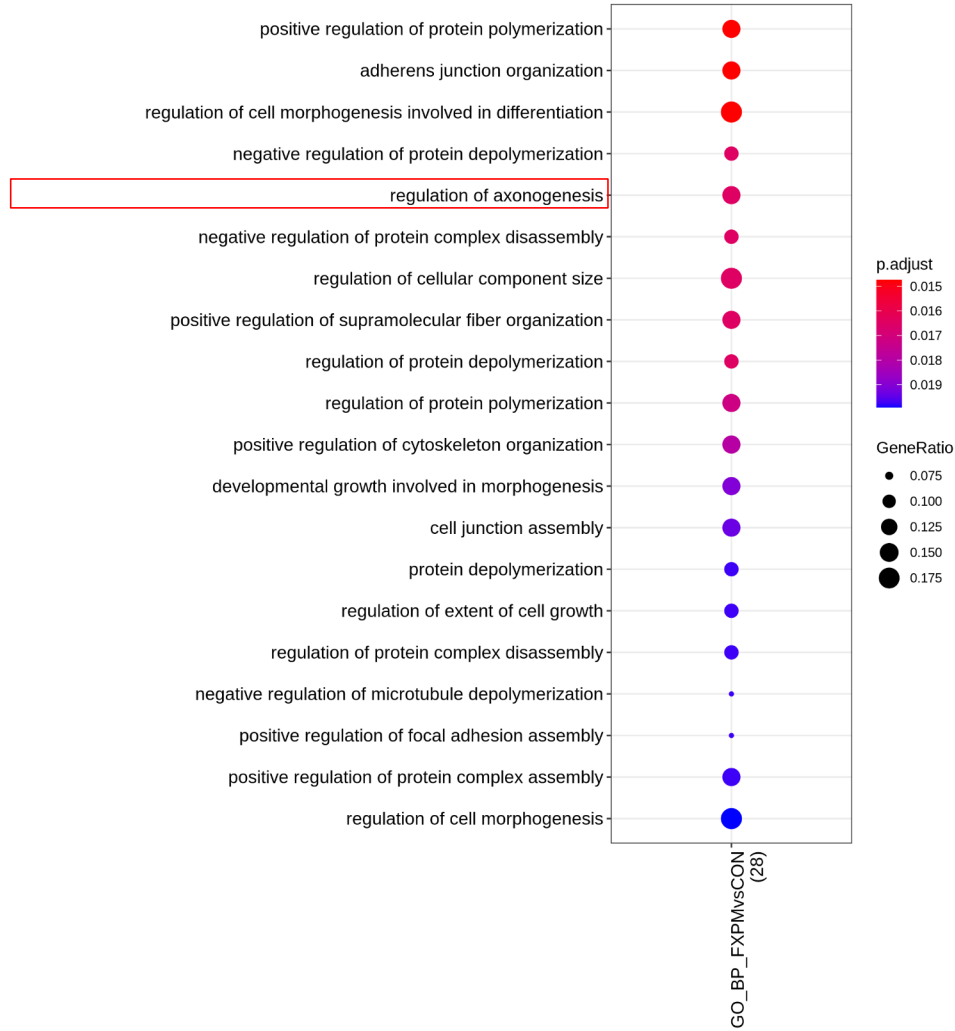



## Supplemental Methods: Analysis

For analysis of demographic data, one premutation case that was extremely aged is listed here as 89+ to ensure sample de-identification and sample points were removed from any graphs presented here to ensure de-identification. For premutation cluster proportion analysis, we used linear regression to determine the effect of both age and premutation status on cluster proportions. This approach is conservative, given our small sample size. We note that one young control sample had a high proportion of the committed progenitor OL I and one premutation sample demonstrated higher than expected OPC number. Additionally, the FXS case with the gene deletion demonstrated an unusually high presence of OLII.

Differential expression analysis was done with the FindMarkers functionality in Seurat (1) using settings of MAST test,  $\text{padj} < 0.05$ , and  $\text{logfc.threshold} = 0.25$  for all cell clusters. A priori we calculated that 400 cells/condition cluster are required to detect 80% of differentially expressed genes with a false discovery rate of 5%. Thus, we are underpowered for rare cell types such as endothelial cells and Purkinje cells in which low cell numbers will make it more difficult to detect reliable changes in gene expression. We chose to omit downsampling nuclei to preserve power. Results were compared to a subset downsampled dataset for select clusters with larger nuclei number, and results were found to be similar both in the pattern of differentially regulated genes as well as the specific genes present in the data set. To ascertain the effects of age and PMI, differential expression analysis was performed using FindMarkers function in Seurat (MAST test,  $\text{padj} < 0.05$ ,  $\text{logfc.threshold} = 0.25$ ,  $\text{latent.vars} = \text{"age" or "PMI"}$ ). We used covariate "age" and "PMI" in MAST separately. To generate a set of FMRP target genes in humans, FMRP targets that were functionally validated in human cell types were combined (2-4), and DiVenn (<https://divenn.tch.harvard.edu>) was used to visualize expression of this FMRP network in cellular subsets (5). Gene ontology/ enrichment analysis was conducted with clusterProfiler (6, 7) with statistical significance testing using  $\text{padj}$  (Benjamin Hochberg)  $< 0.05$ . Transcriptional regulators were identified using the RCisTarget R package (8) that utilizes the cisTarget database of gene regulators and identifies enriched transcription factor binding sites +/- 10kb for all genes. Input gene lists were taken from differential expression analysis results as described above from the premutation vs control cortical microglia and cerebellar Bergmann glia lists. A normalized enrichment score cutoff greater than 3 was used to identify significantly enriched motifs.

For pseudotime analysis, Monocle3 (9, 10) was used to recluster oligodendrocyte clusters, rescaling integrated data and regressing out the top 9 most differentially expressed genes. Spatial autocorrelation for gene expression changes across pseudotime were detected with Moran's I test (full and single branches separately). Genes were selected with  $q\text{-value} < 0.05$  and Moran's statistic  $> 0.1$ . To fit NB-GAM models and fitting smoothers in a condition-specific manner (tradeSeq), all genes were used for normalization but the model fitting is done only to the genes selected and the genes of interest (oligodendrocyte markers). Differential gene expression across

pseudotime between conditions (fold change greater than 2) was conducted with the Wald test, testing whether conditions are the significant variable in a model of expression along the trajectory (pseudotime). Mitochondrial genes were omitted from visualization of results given potential confounding effects.

## Supplemental References

1. R. Satija, J. A. Farrell, D. Gennert, A. F. Schier, A. Regev (2015) Spatial reconstruction of single-cell gene expression data. in *Nature Biotechnology*.
2. S. S. Tran *et al.*, Widespread RNA editing dysregulation in brains from autistic individuals. *Nat Neurosci* **22**, 25-36 (2019).
3. M. Ascano, Jr. *et al.*, FMRP targets distinct mRNA sequence elements to regulate protein expression. *Nature* **492**, 382-386 (2012).
4. M. Li *et al.*, Identification of FMR1-regulated molecular networks in human neurodevelopment. *Genome Res* **30**, 361-374 (2020).
5. L. Sun *et al.*, DiVenn: An Interactive and Integrated Web-Based Visualization Tool for Comparing Gene Lists. *Front Genet* **10**, 421 (2019).
6. T. Wu *et al.*, clusterProfiler 4.0: A universal enrichment tool for interpreting omics data. *Innovation (Camb)* **2**, 100141 (2021).
7. G. Yu, L. G. Wang, Y. Han, Q. Y. He, clusterProfiler: an R package for comparing biological themes among gene clusters. *OMICS* **16**, 284-287 (2012).
8. S. Aibar *et al.*, SCENIC: single-cell regulatory network inference and clustering. *Nat Methods* **14**, 1083-1086 (2017).
9. C. Trapnell *et al.*, The dynamics and regulators of cell fate decisions are revealed by pseudotemporal ordering of single cells. *Nat Biotechnol* **32**, 381-386 (2014).
10. X. Qiu *et al.*, Reversed graph embedding resolves complex single-cell trajectories. *Nat Methods* **14**, 979-982 (2017).
